# Supplementary material
Source: publisher figshare collection journal article supplement (https://tandf.figshare.com/ndownloader/files/14768969)

## SUPPLEMENTARY MATERIAL

### Semi-synthesis of A Novel Hybrid Isoxazolidino Withaferin via Chemoselective and Diastereoselective 1,3-Dipolar Nitronc Cycloaddition Reaction

Ramkrishna Mandal<sup>†</sup>, Meenakshi Singh<sup>†</sup>, Amrutha Krishnan A.V., Yogita H. Dahat, Yogesh P. Bharitkar\*, V. Ravichandiran and Abhijit Hazra\*

*National Institute of Pharmaceutical Education and Research (NIPER), Chunilal Bhawan, 168, Maniktala Main Road, Kolkata - 700054, India*

**Abstract:** A facile, atom-economic synthesis of isoxazolidino withaferin, a novel hybrid of withaferin A, has been accomplished via two-step reaction of nitronc synthesis followed by nitronc 1,3-dipolar cycloaddition. The reaction is highly chemoselective (preferential reaction only on one of the two double bonds present on withaferin A) and diastereoselective affording exclusively the cis-fused products. The structure was determined by detailed analysis of 1D, 2D NMR and mass spectral data.

**Keywords:** Withaferin A; Nitronc-cycloaddition; Semi-synthesis; Isoxazolidine; 2D NMR (HSQC, HMBC, COSY, NOESY);

Figure S1:  $^1\text{H}$  NMR of Withaferin A

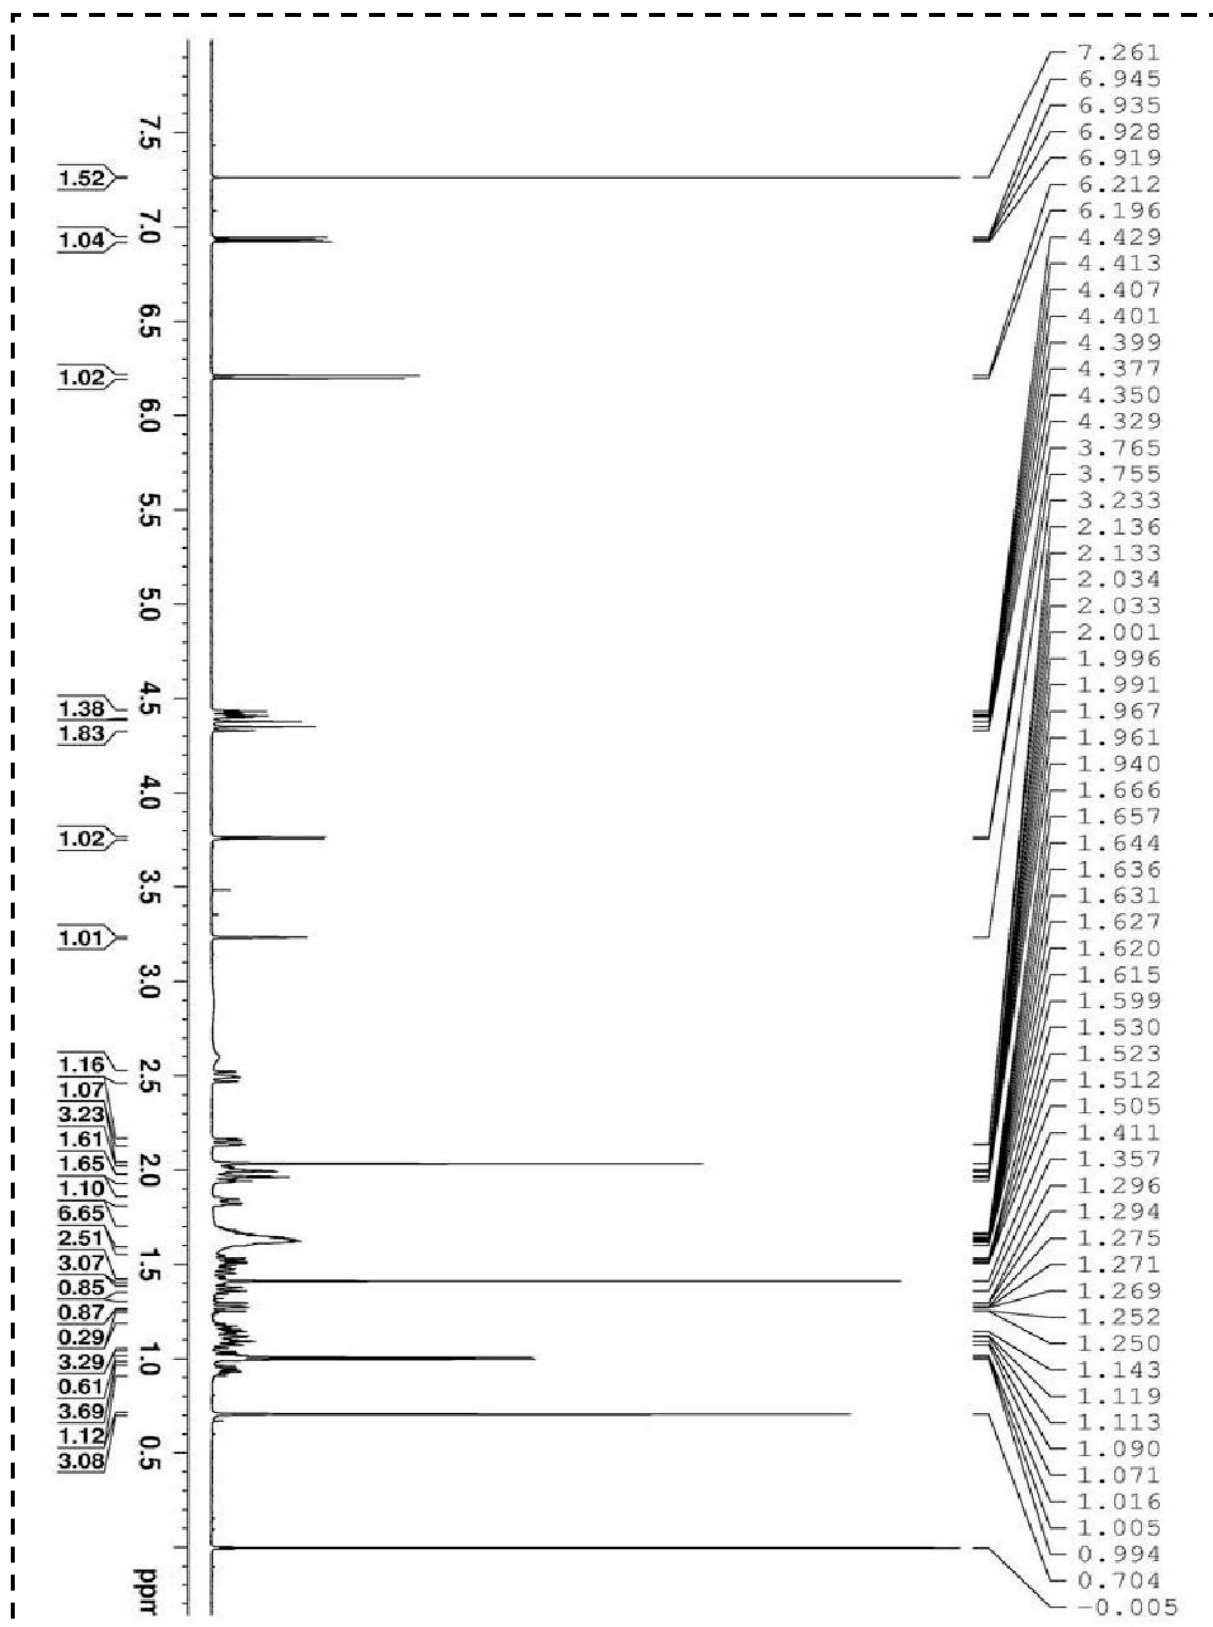

Figure S2:  $^1\text{H}$  NMR of Withaferin A

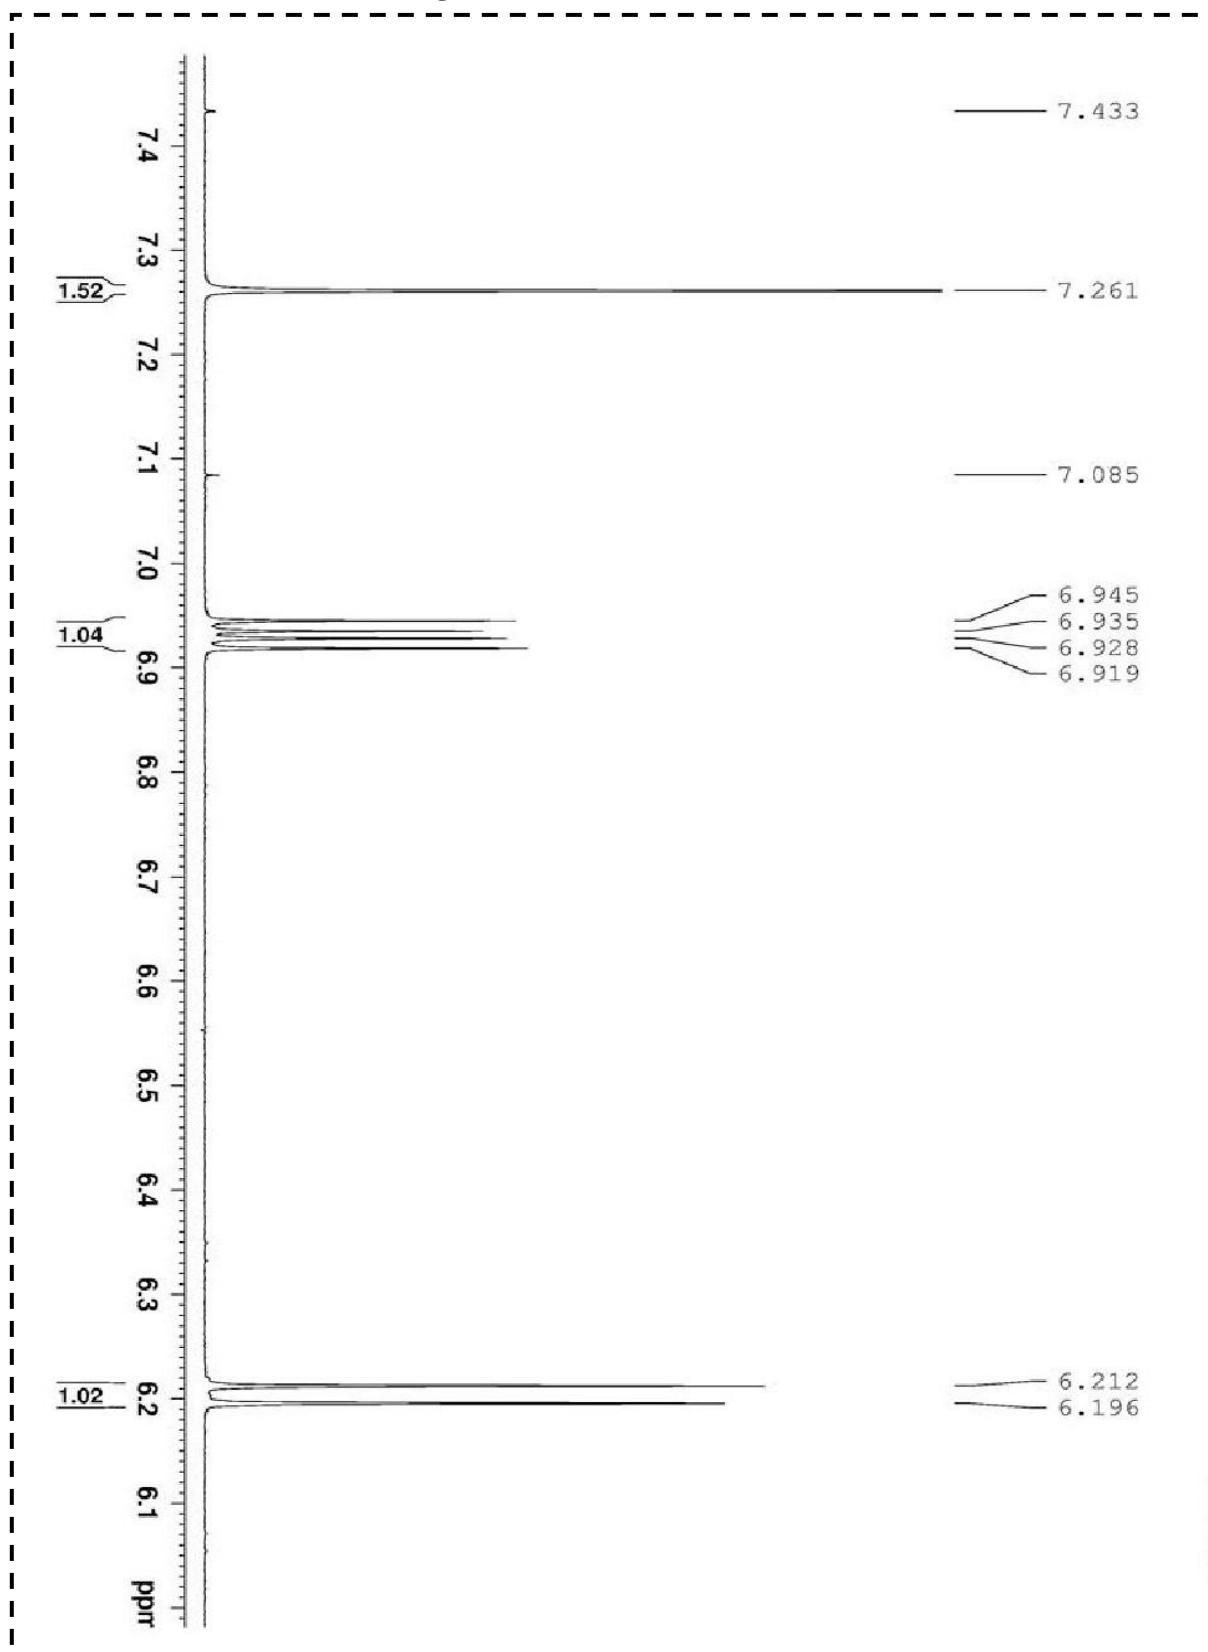

Figure S3:  $^1\text{H}$  NMR of Withaferin A

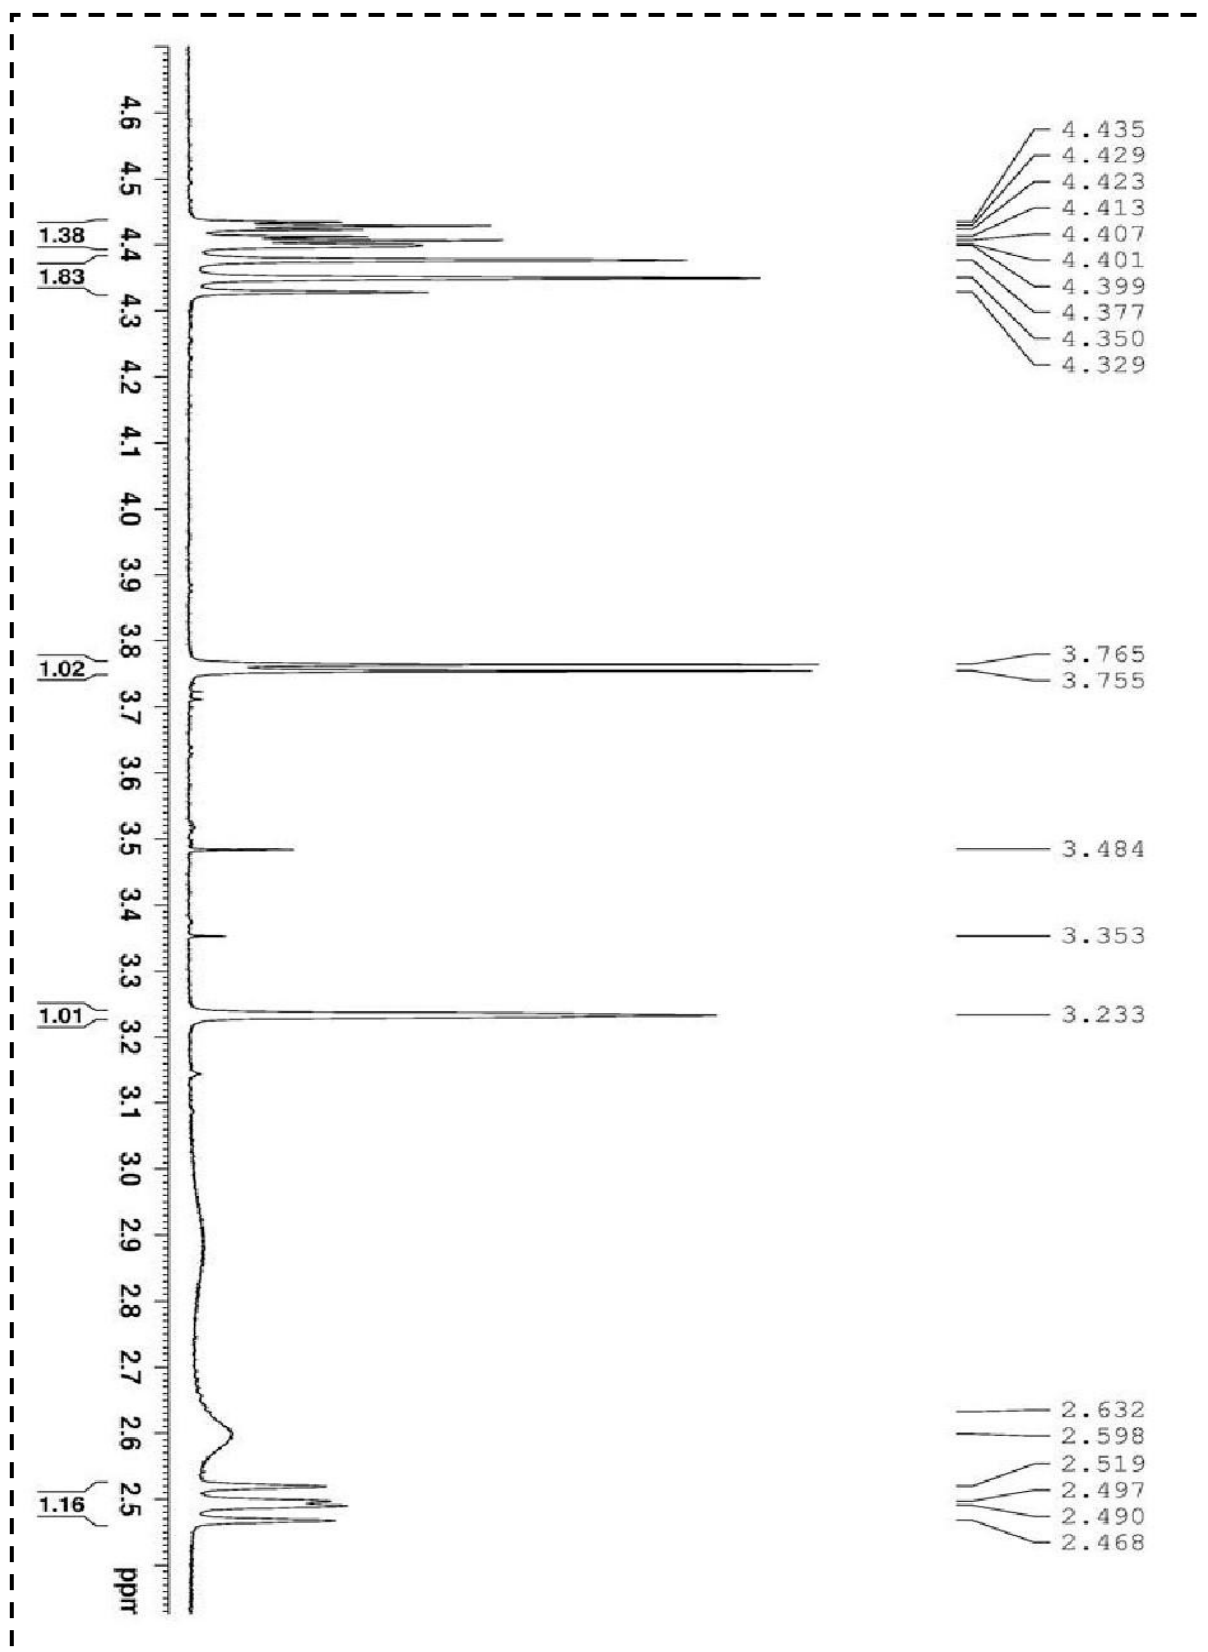

Figure S4:  $^1\text{H}$  NMR of Withaferin A

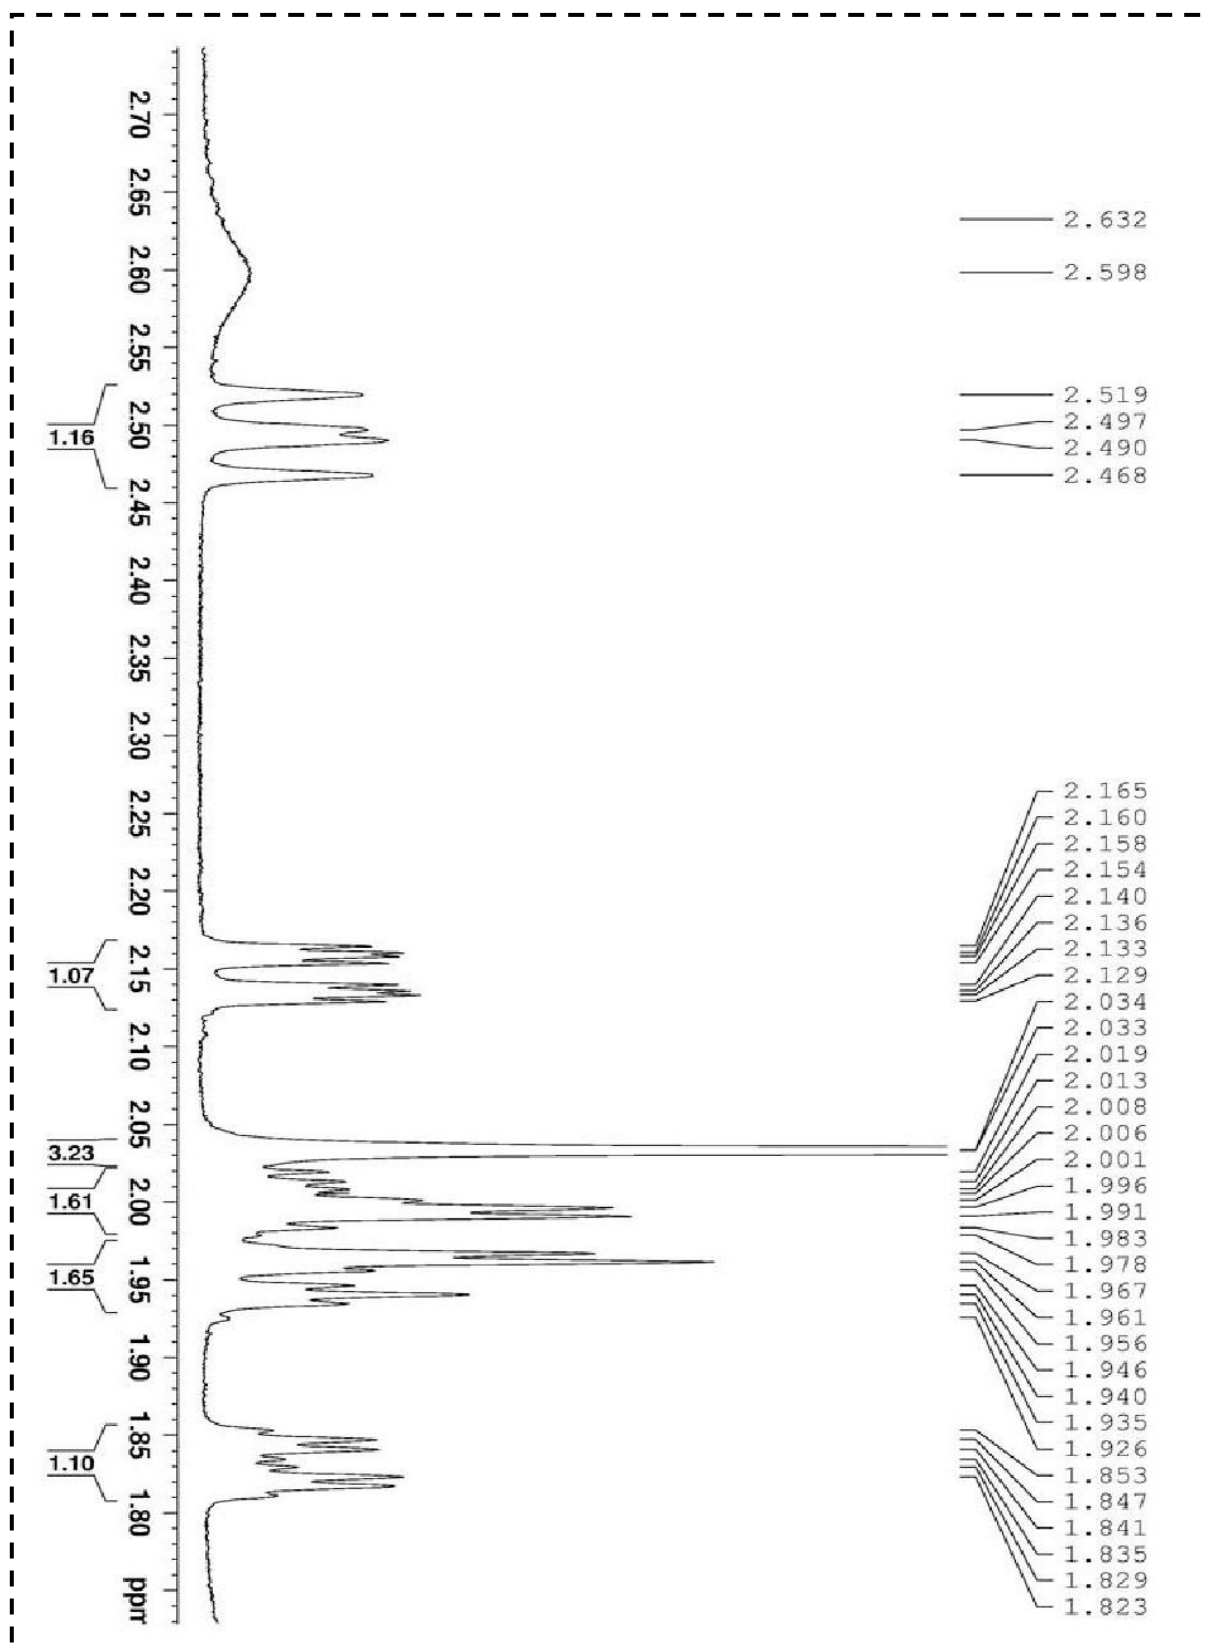

Figure S5:  $^1\text{H}$  NMR of Withaferin A

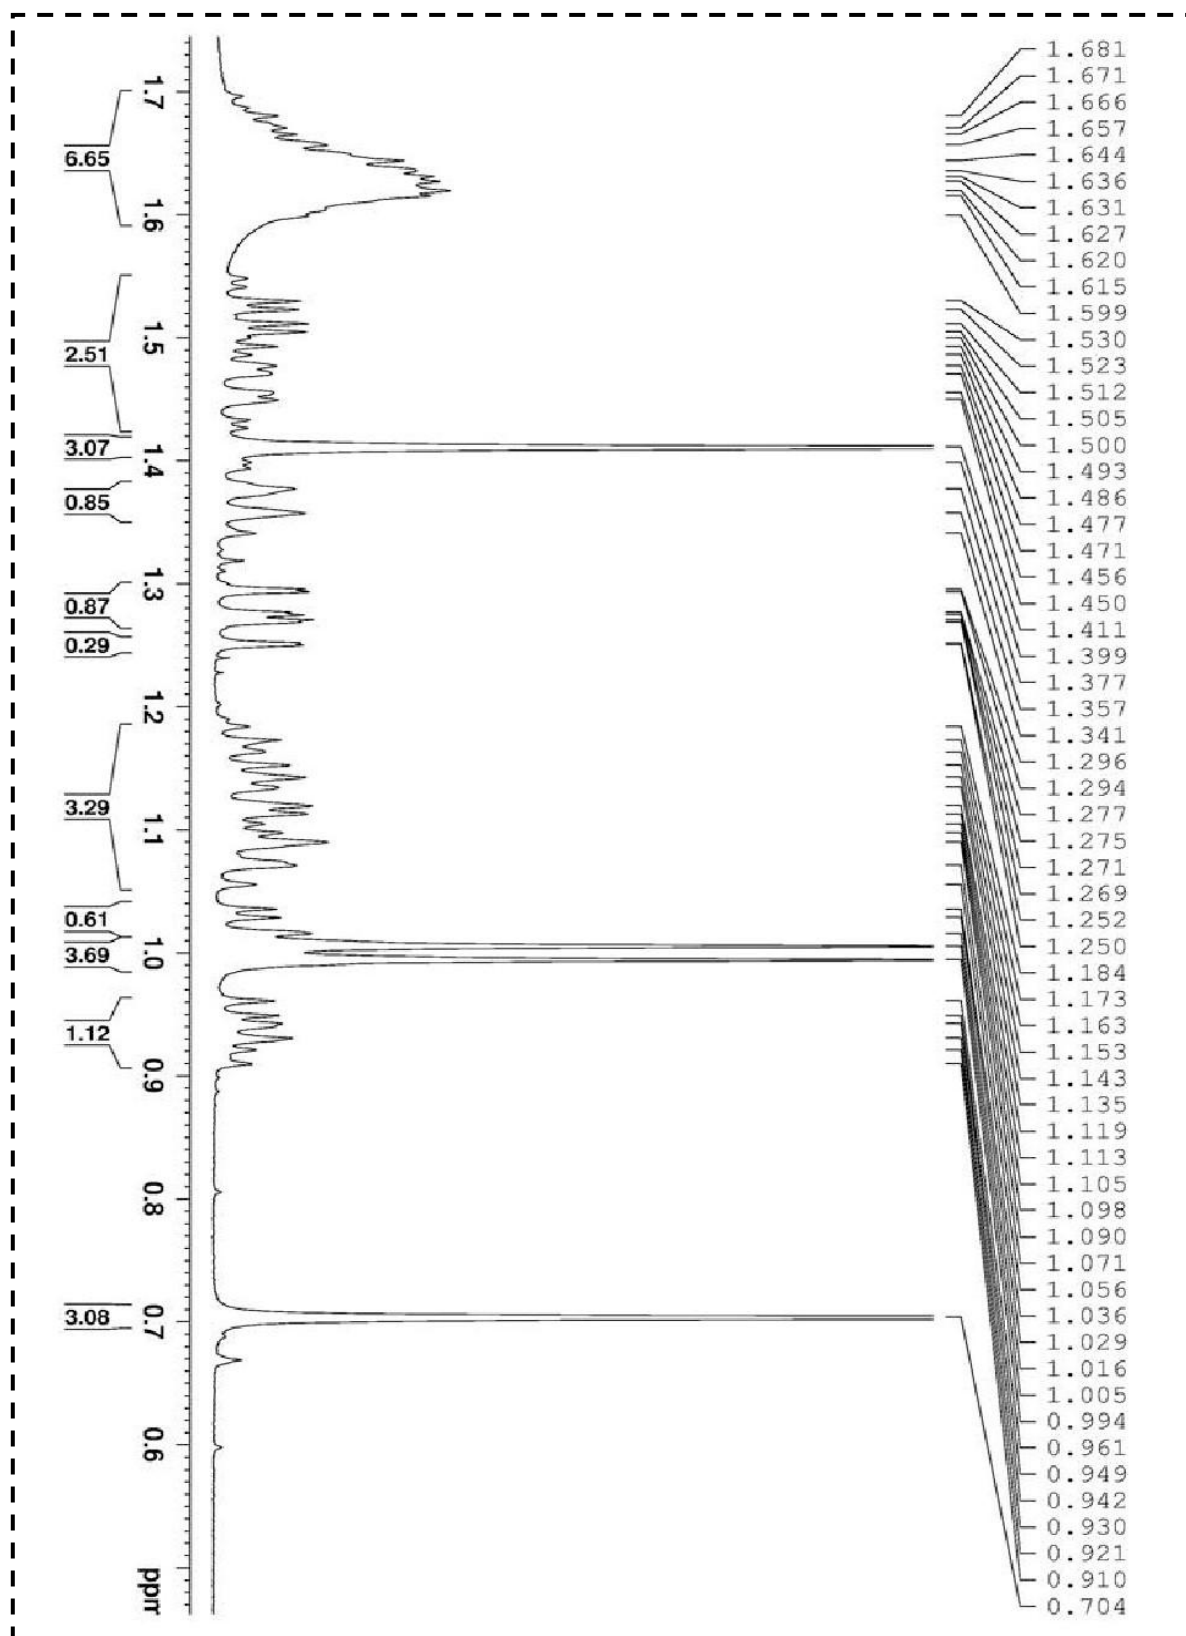

Figure S6:  $^{13}\text{C}$  NMR of Withaferin A

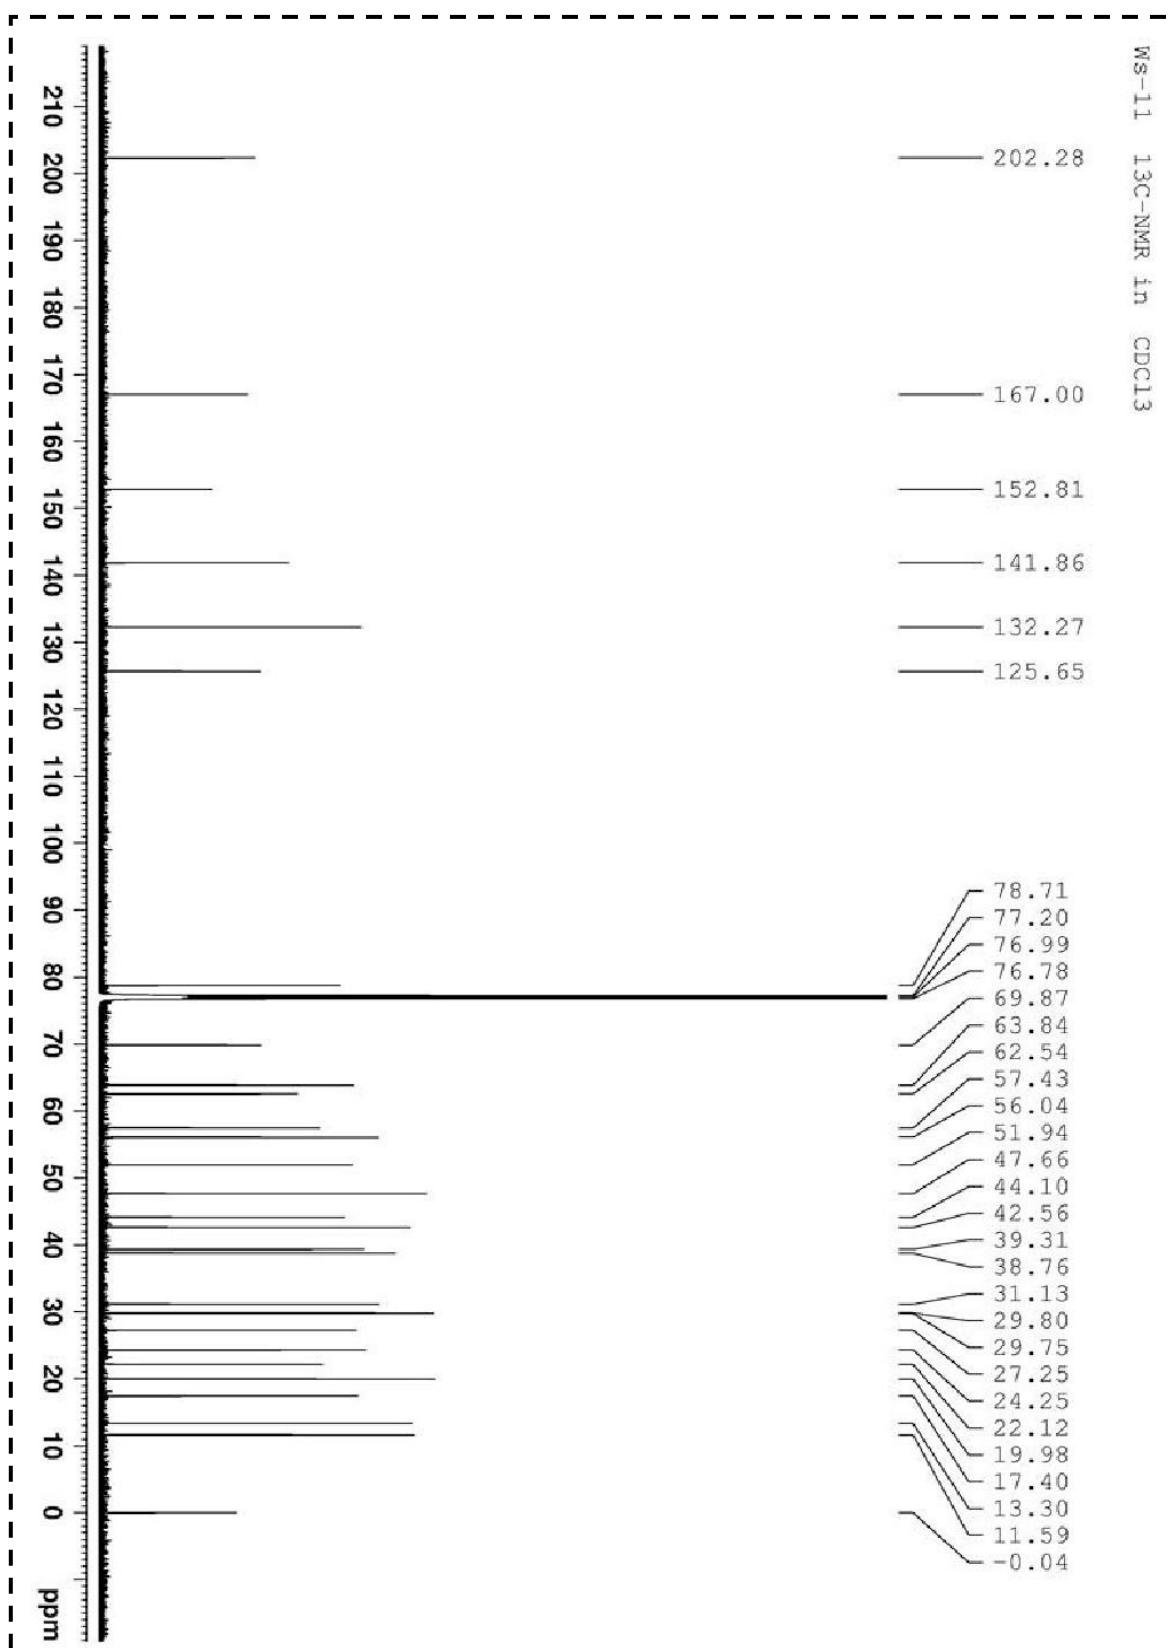

Figure S7:  $^{13}\text{C}$  NMR, DEPT 90, 135 of Withaferin A

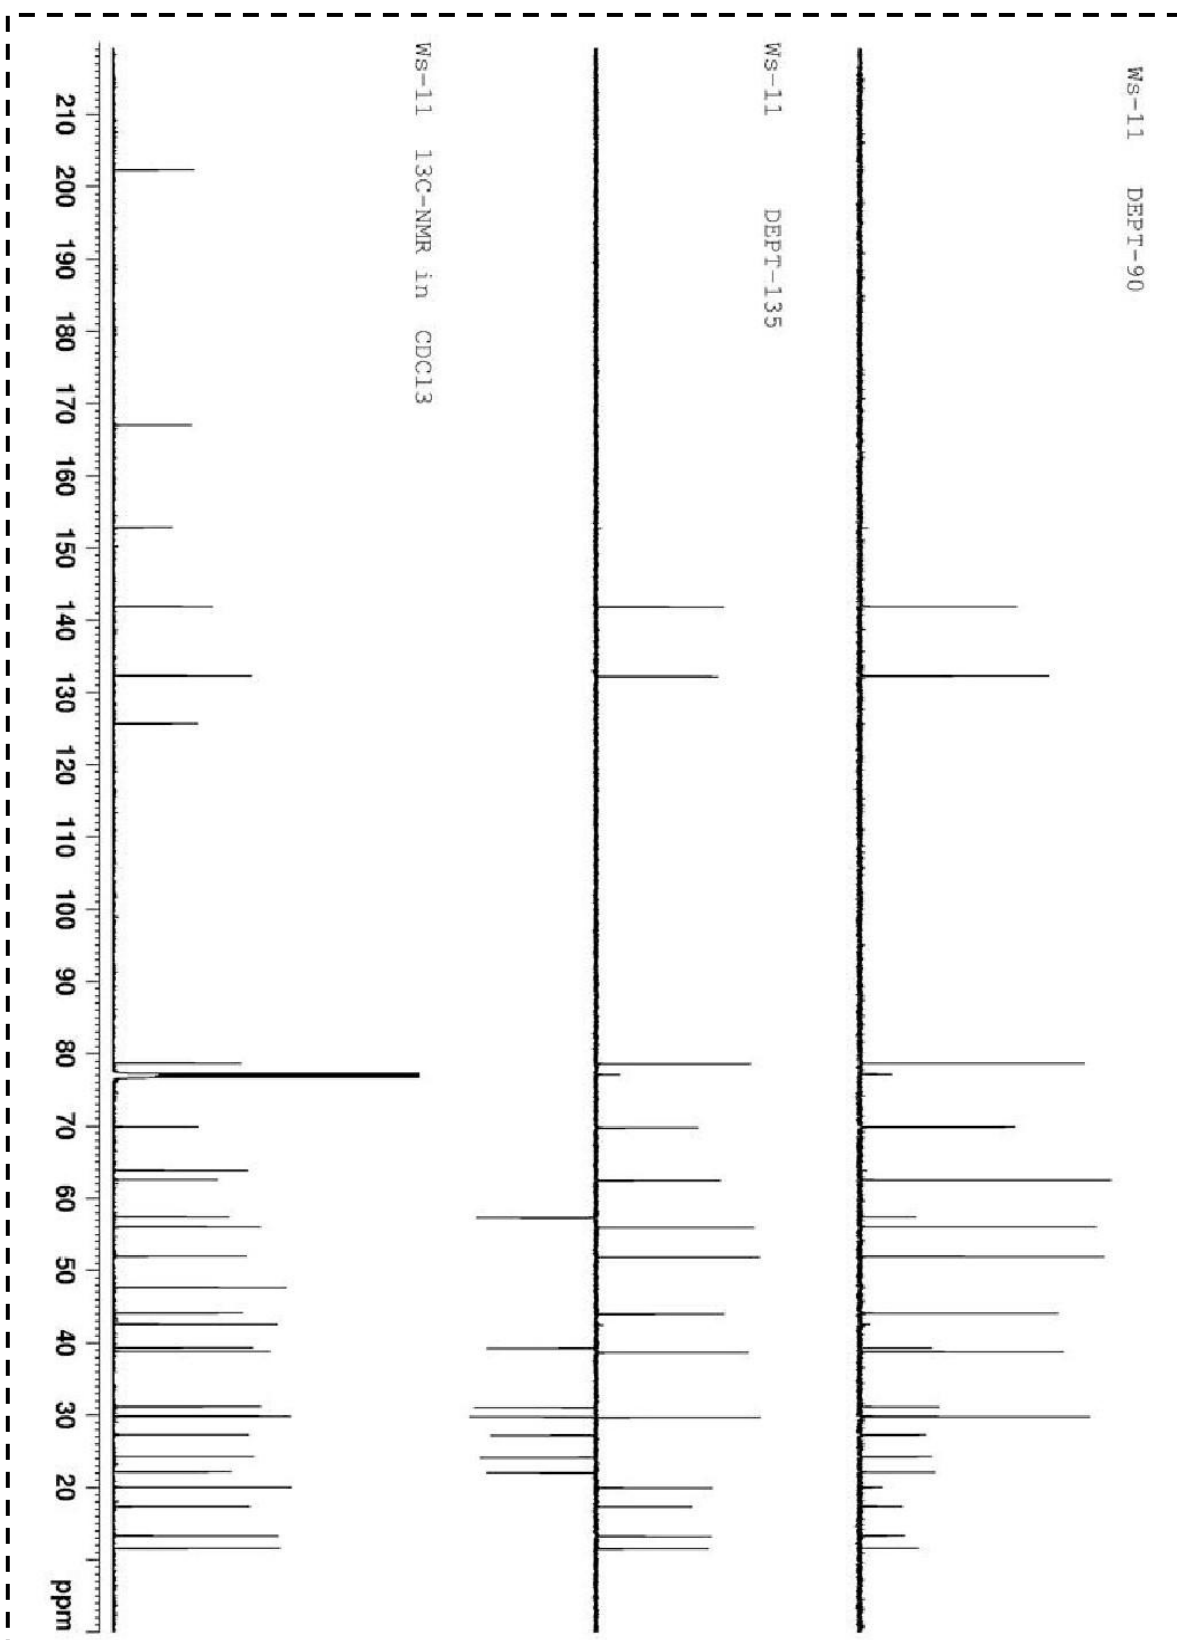



**Figure S8: HPLC Profile of Compound 3A**

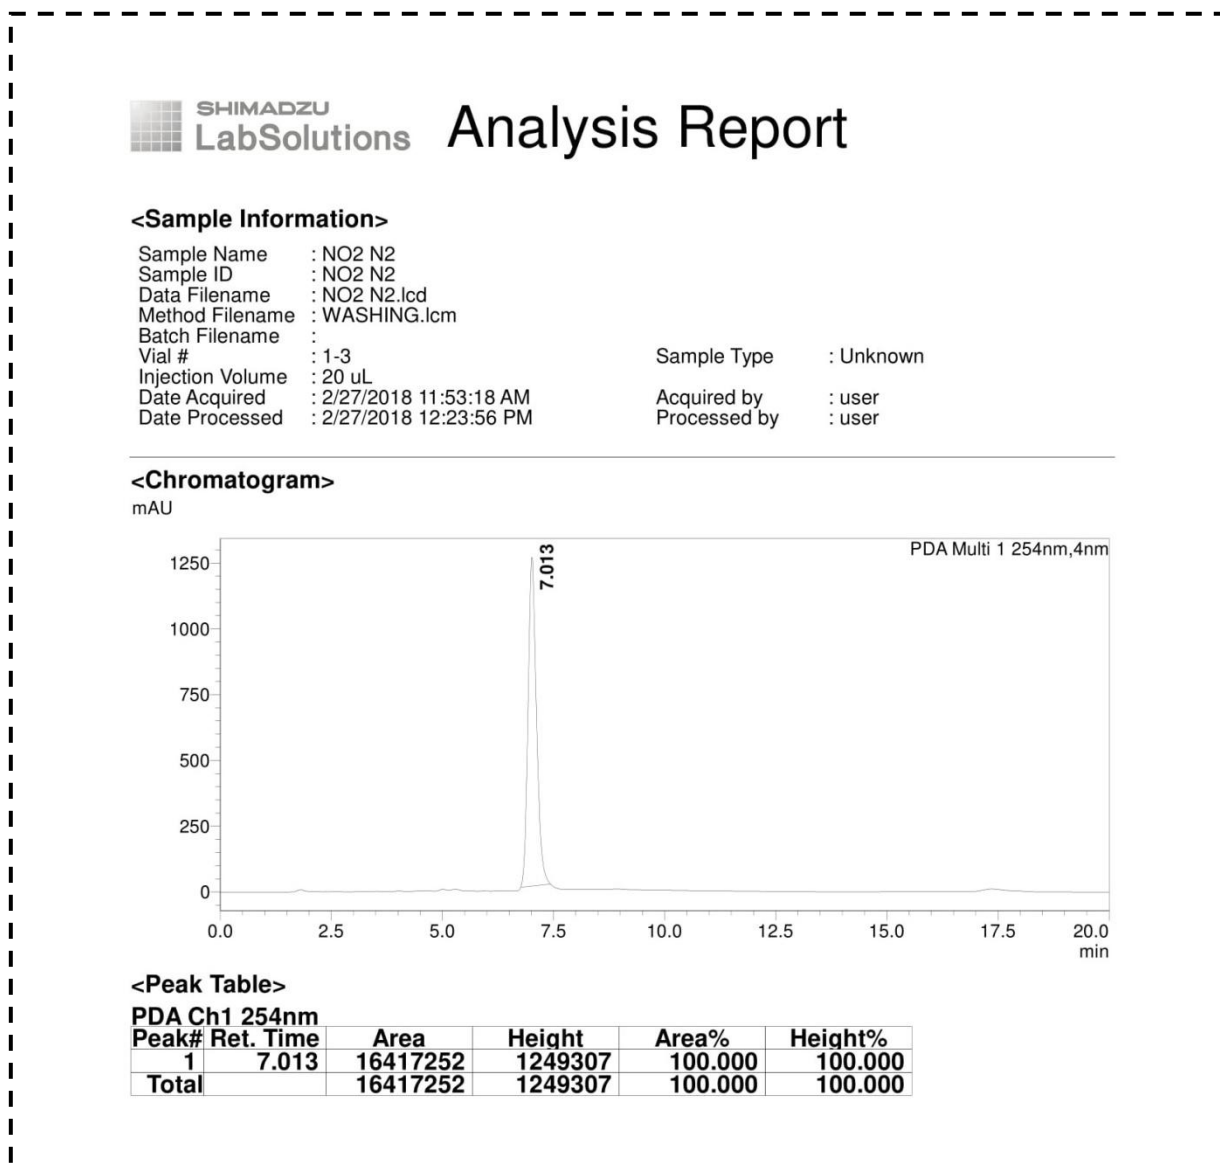

**Figure S9: Mass Spectra of Compound 3A**

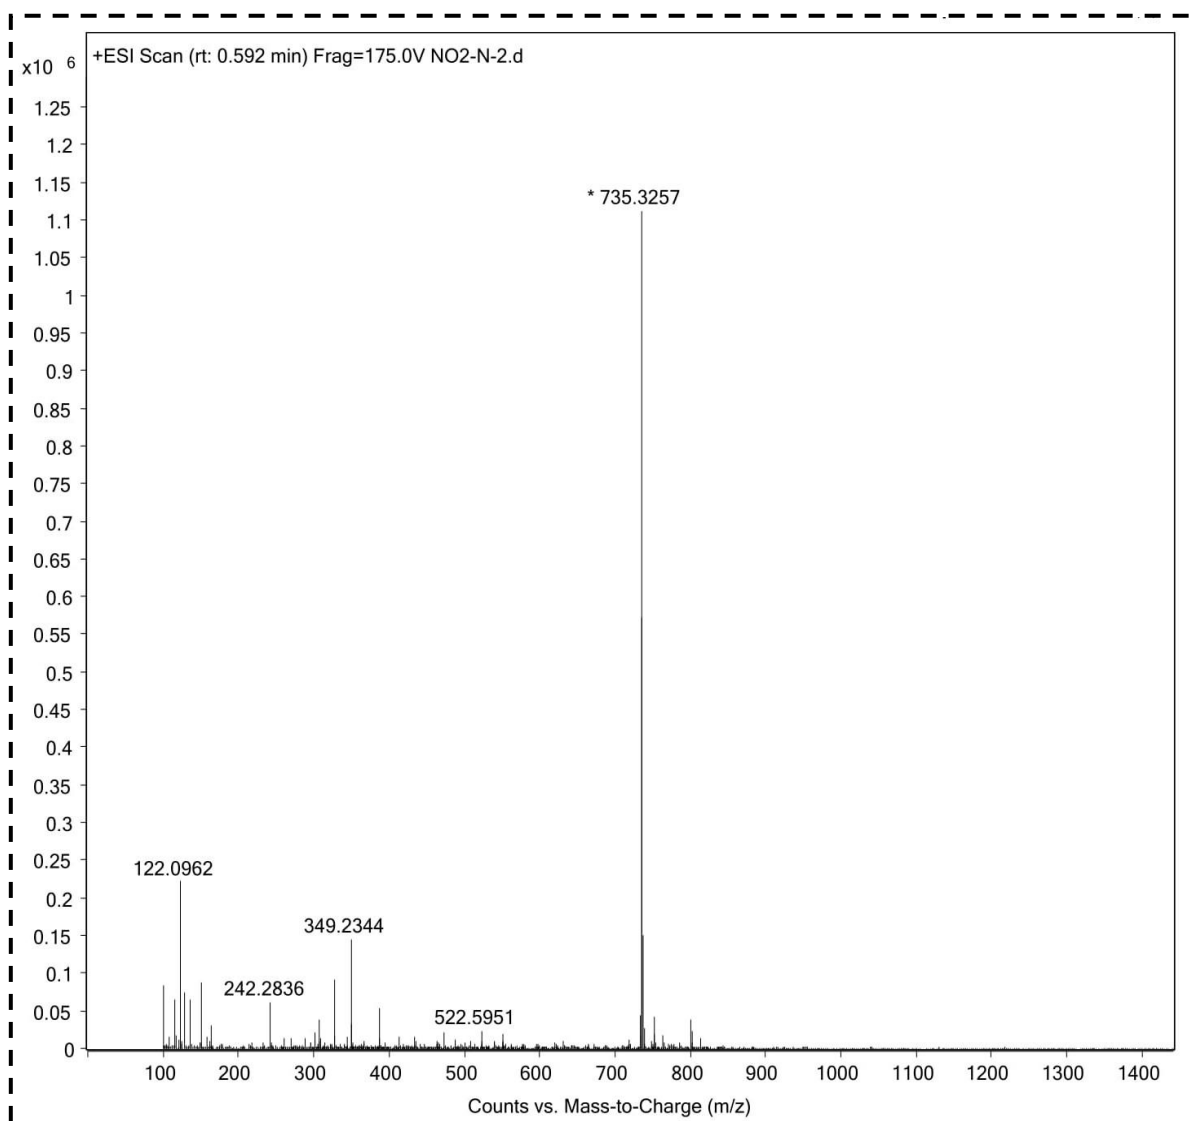

Figure S10:  $^1\text{H}$  NMR of Compound 3A

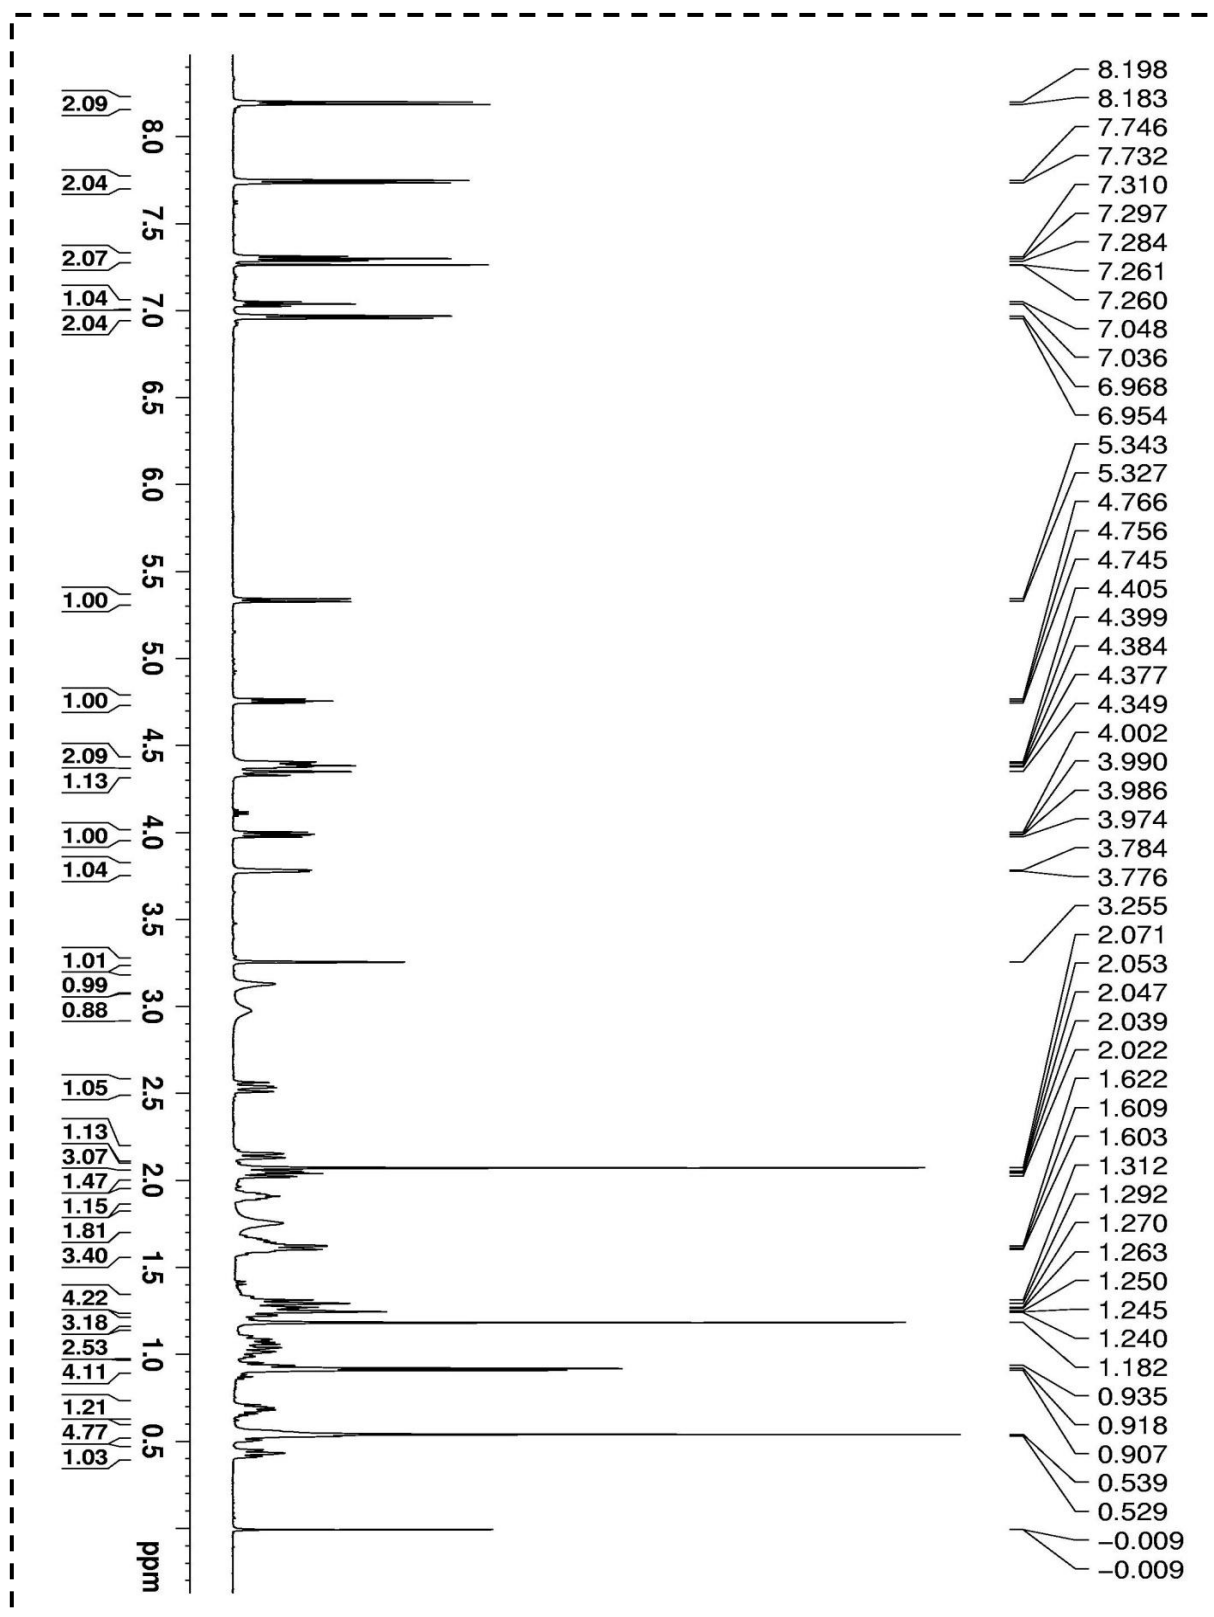

Figure S11:  $^1\text{H}$  NMR of Compound 3A

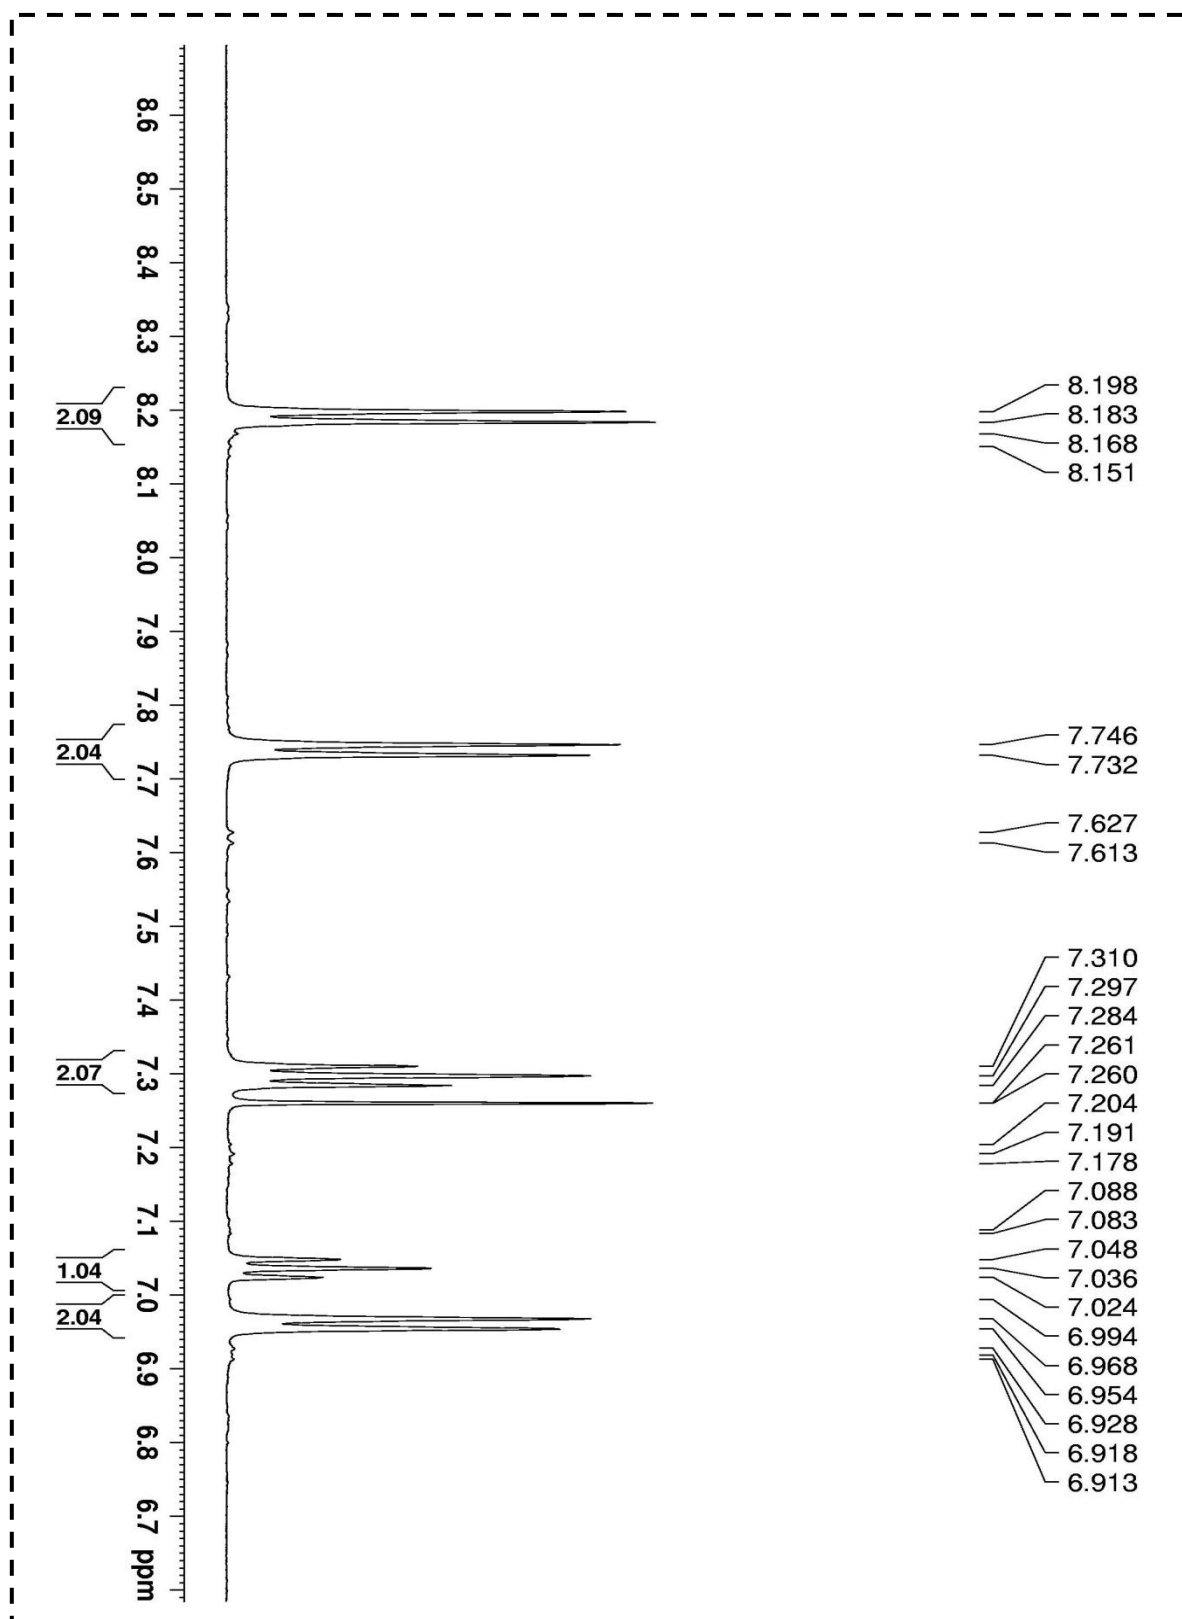

Figure S12:  $^1\text{H}$  NMR of Compound 3A

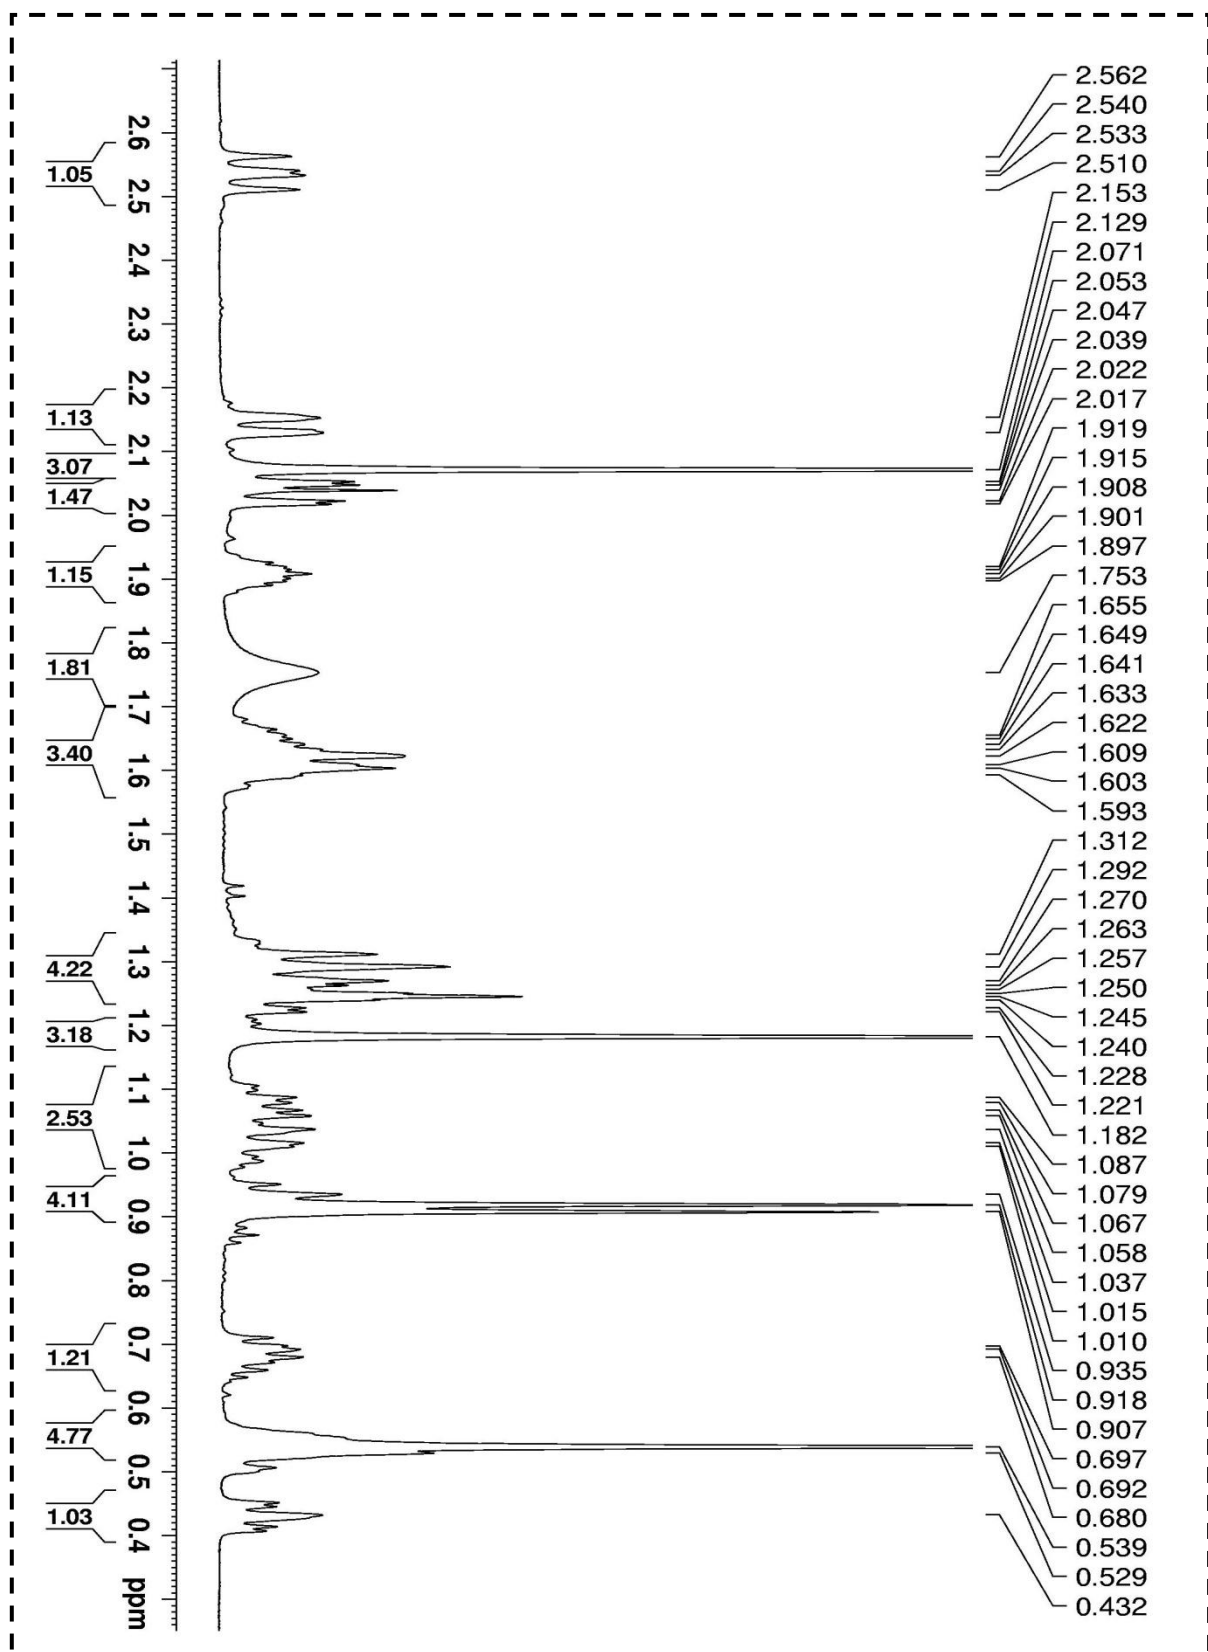

Figure S13:  $^{13}\text{C}$  NMR of Compound 3A

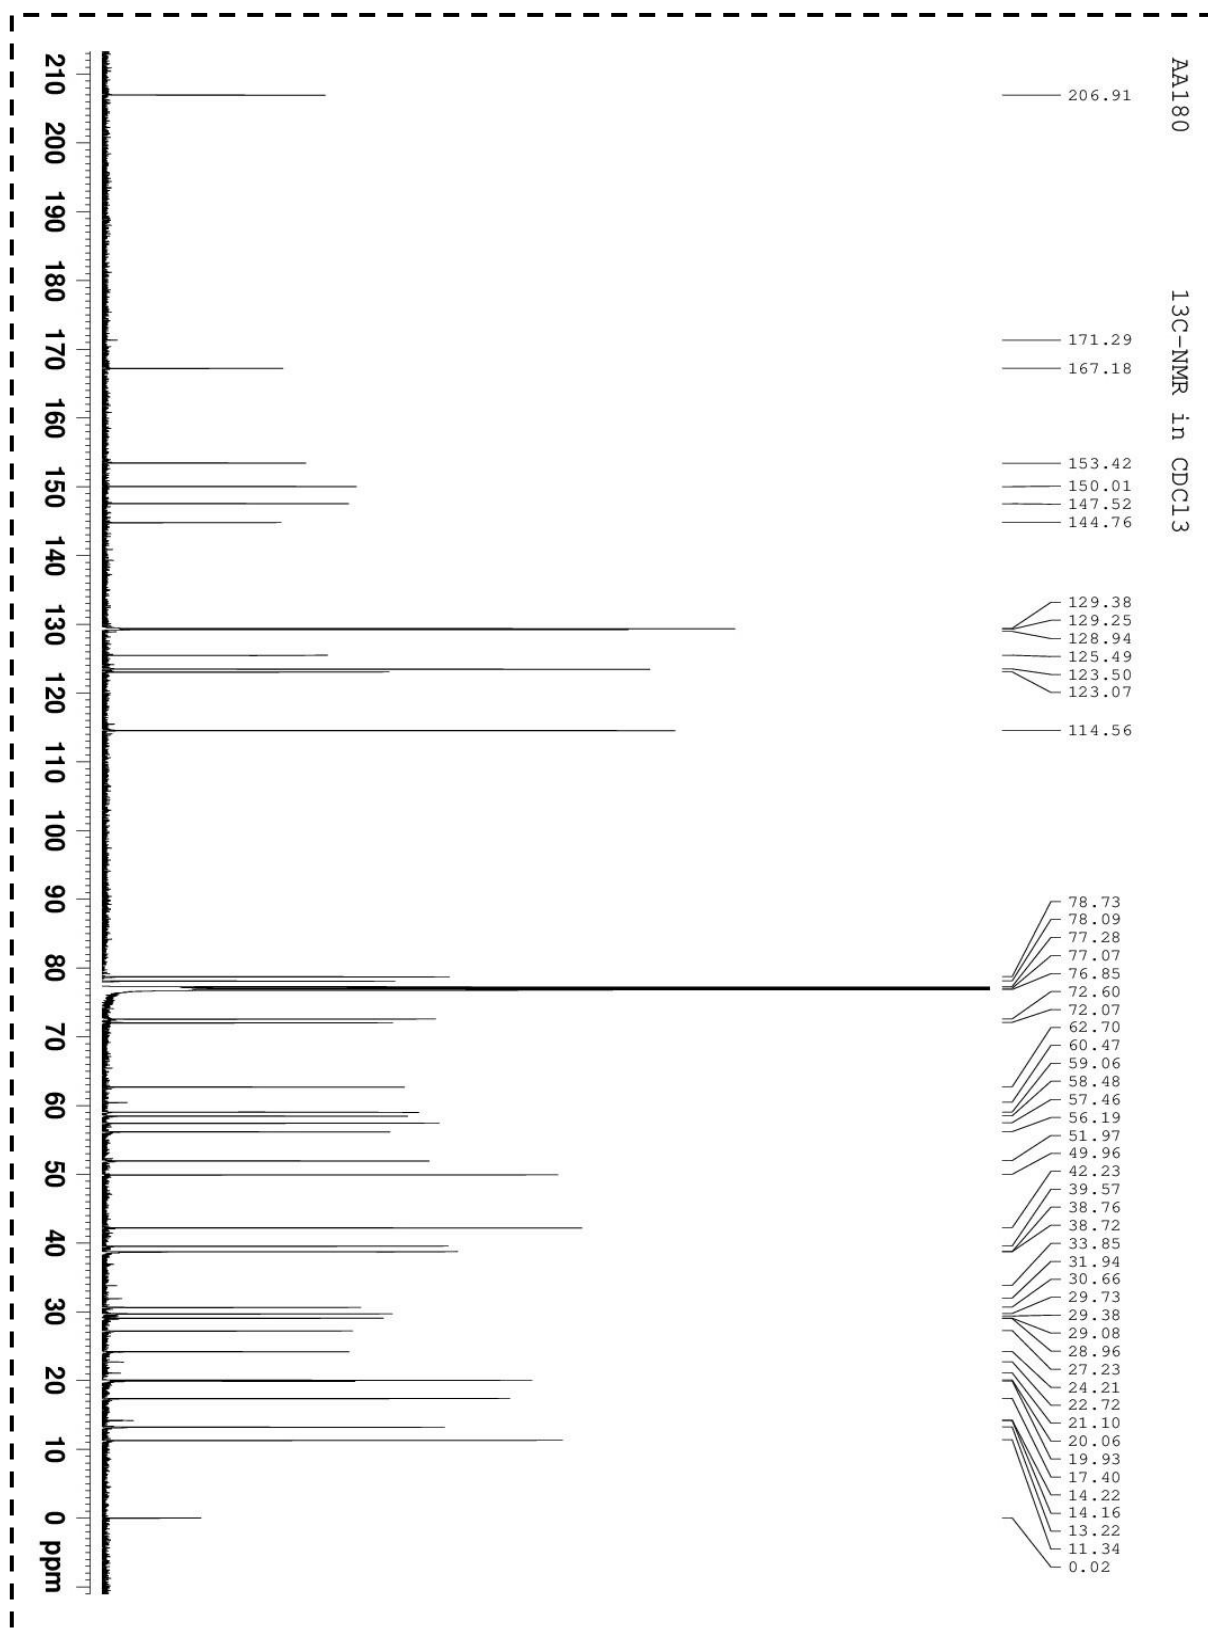

Figure S14:  $^{13}\text{C}$  NMR of Compound 3A

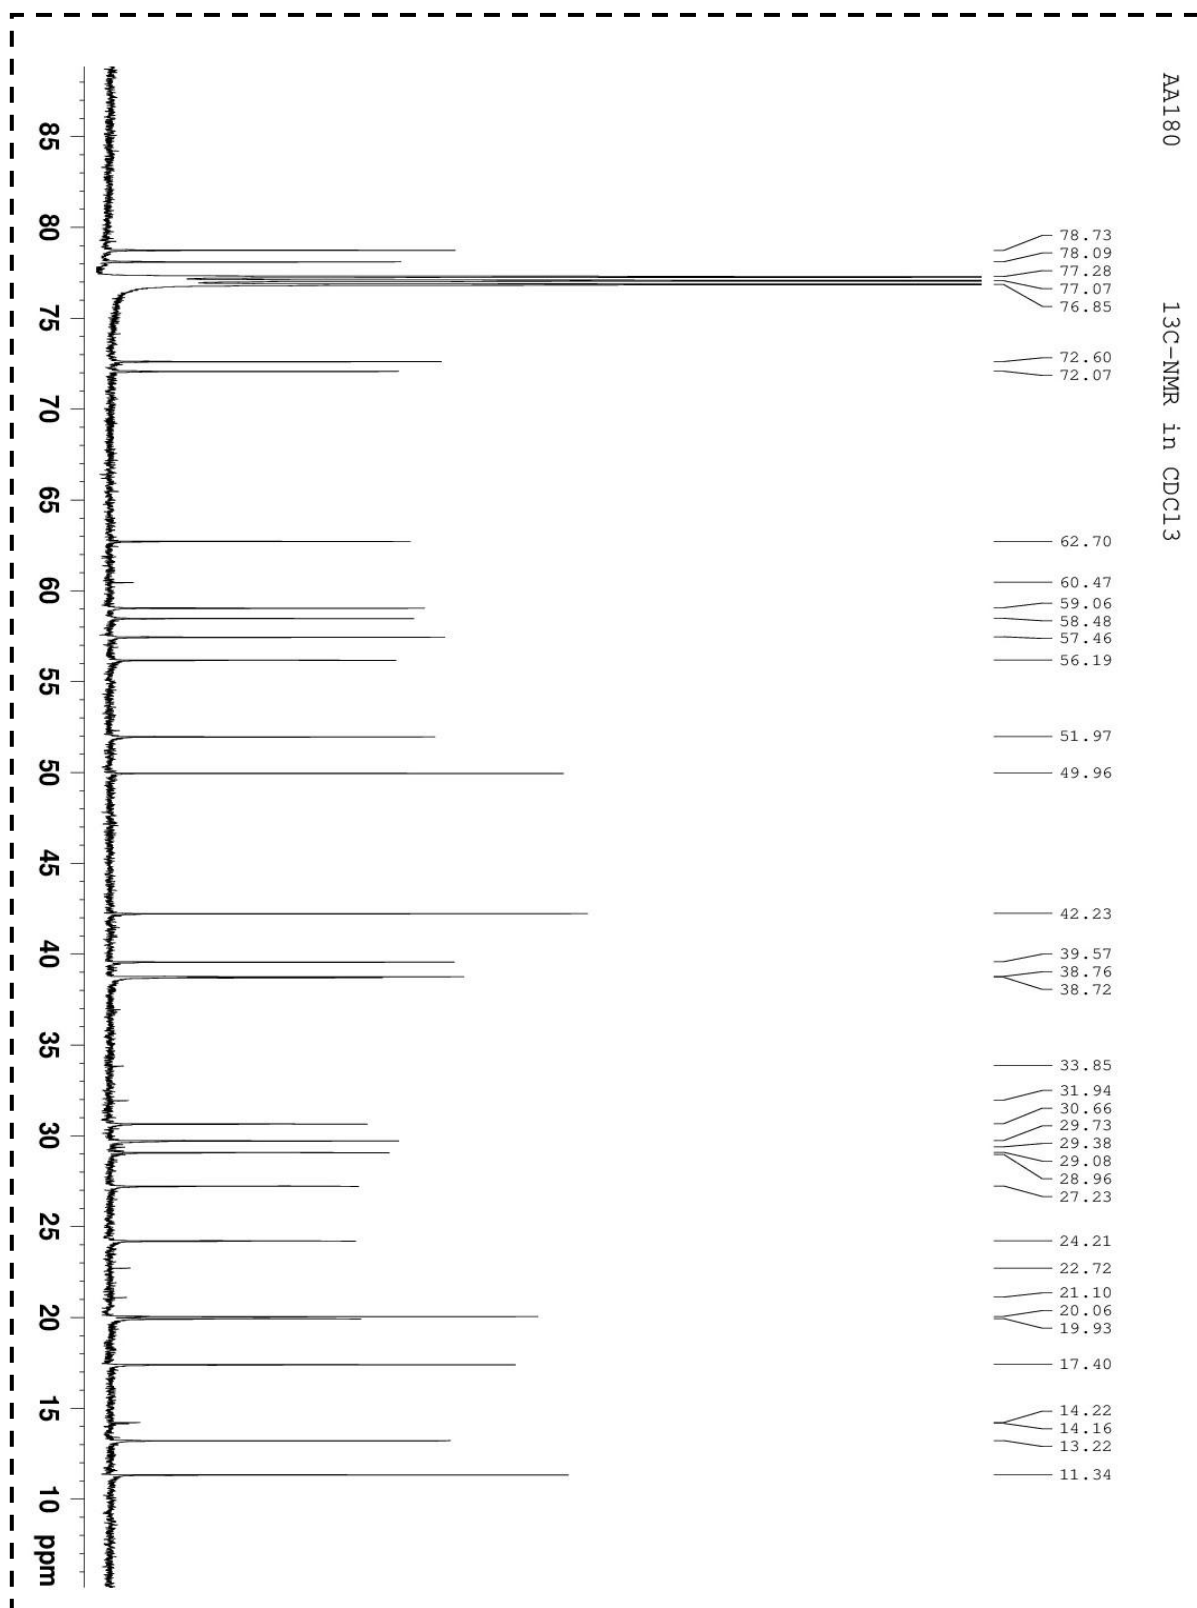

Figure S15: DEPT 135 of Compound 3A

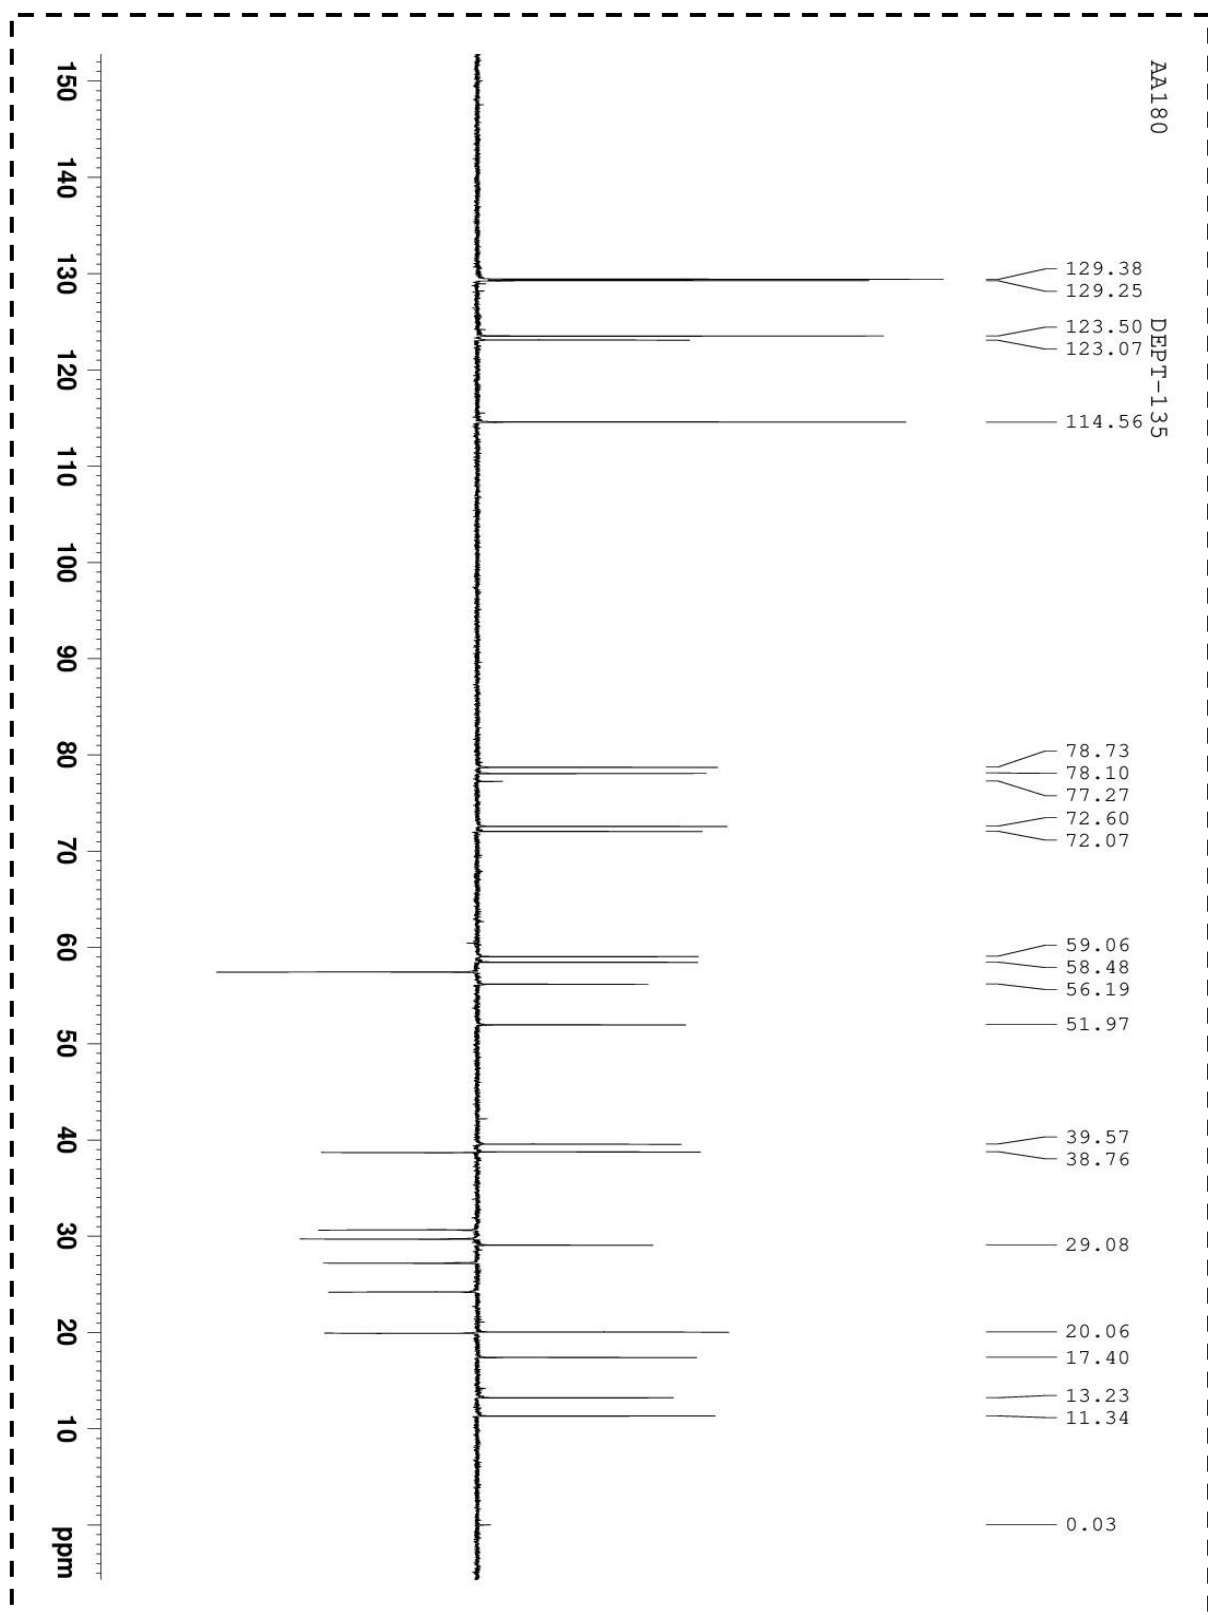



Figure S16: COSY of Compound 3A

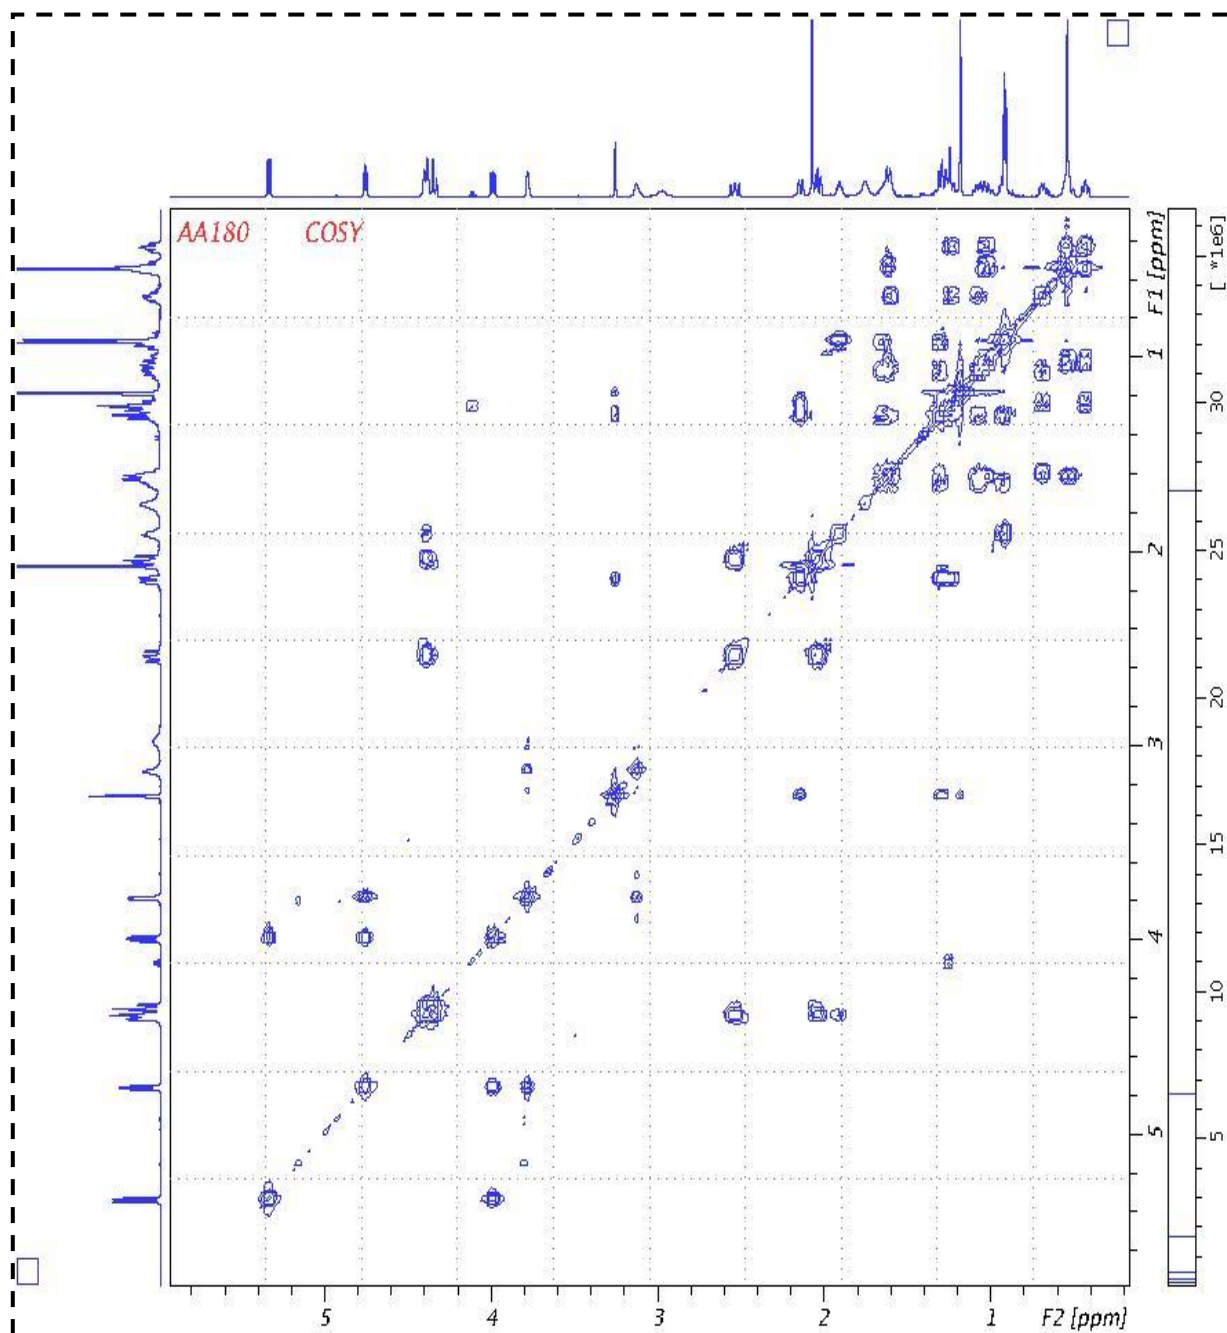

Figure S17: NOESY of Compound 3A

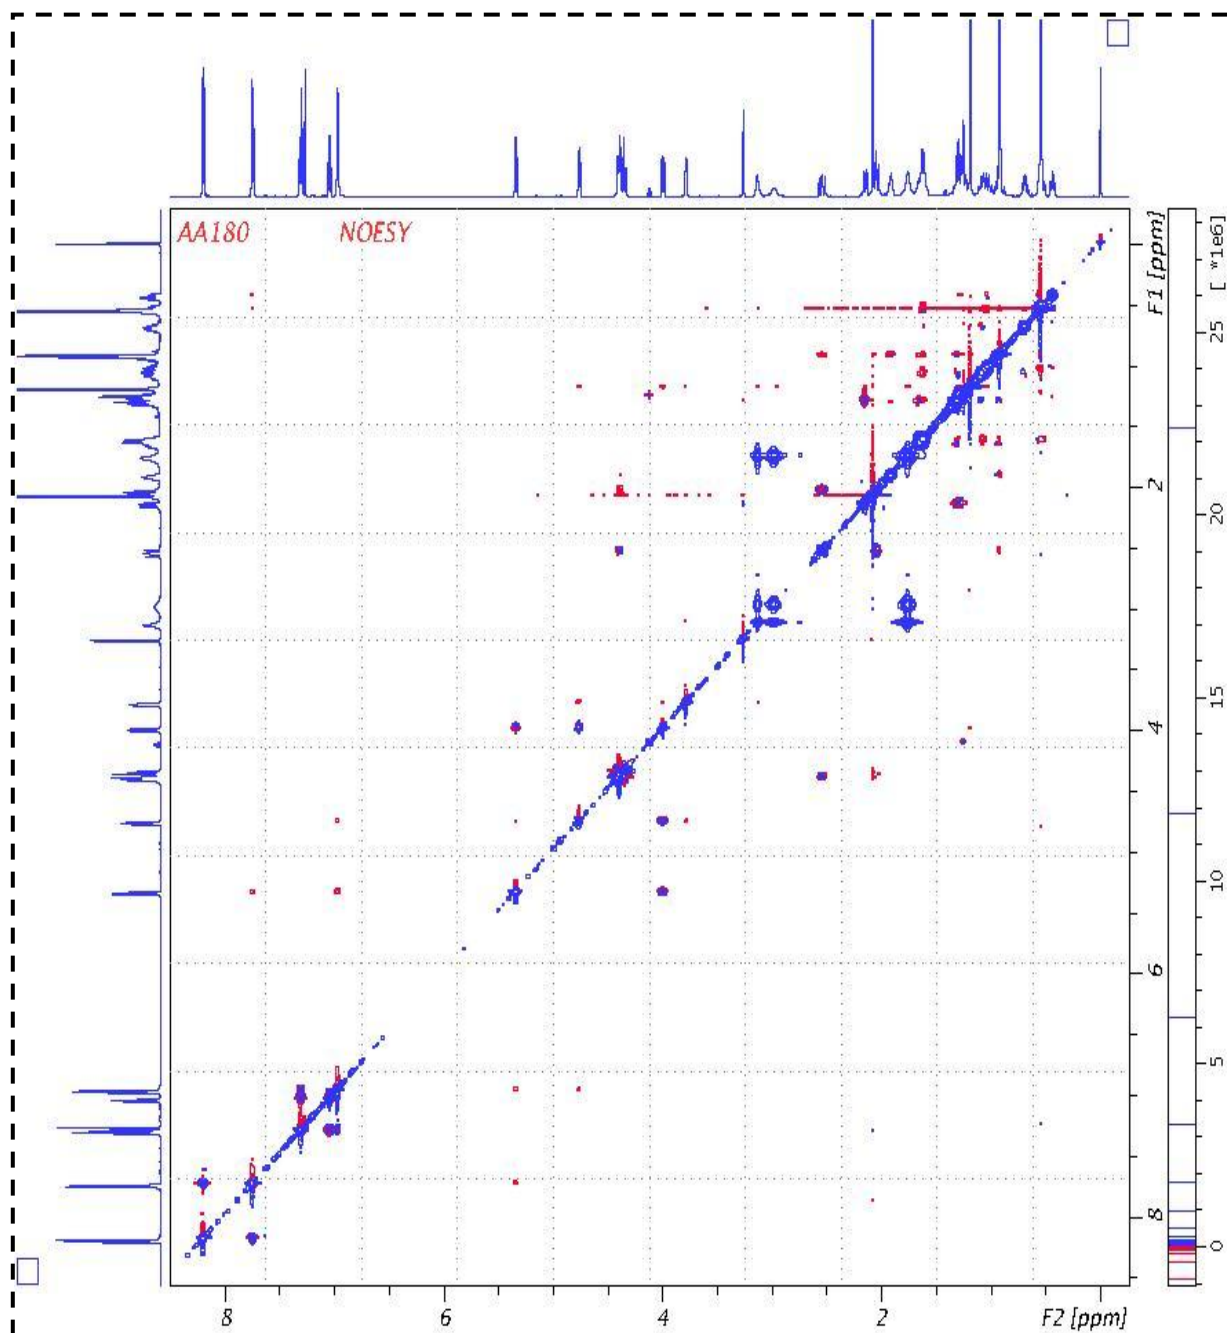

Figure S18: HMBC of Compound 3A

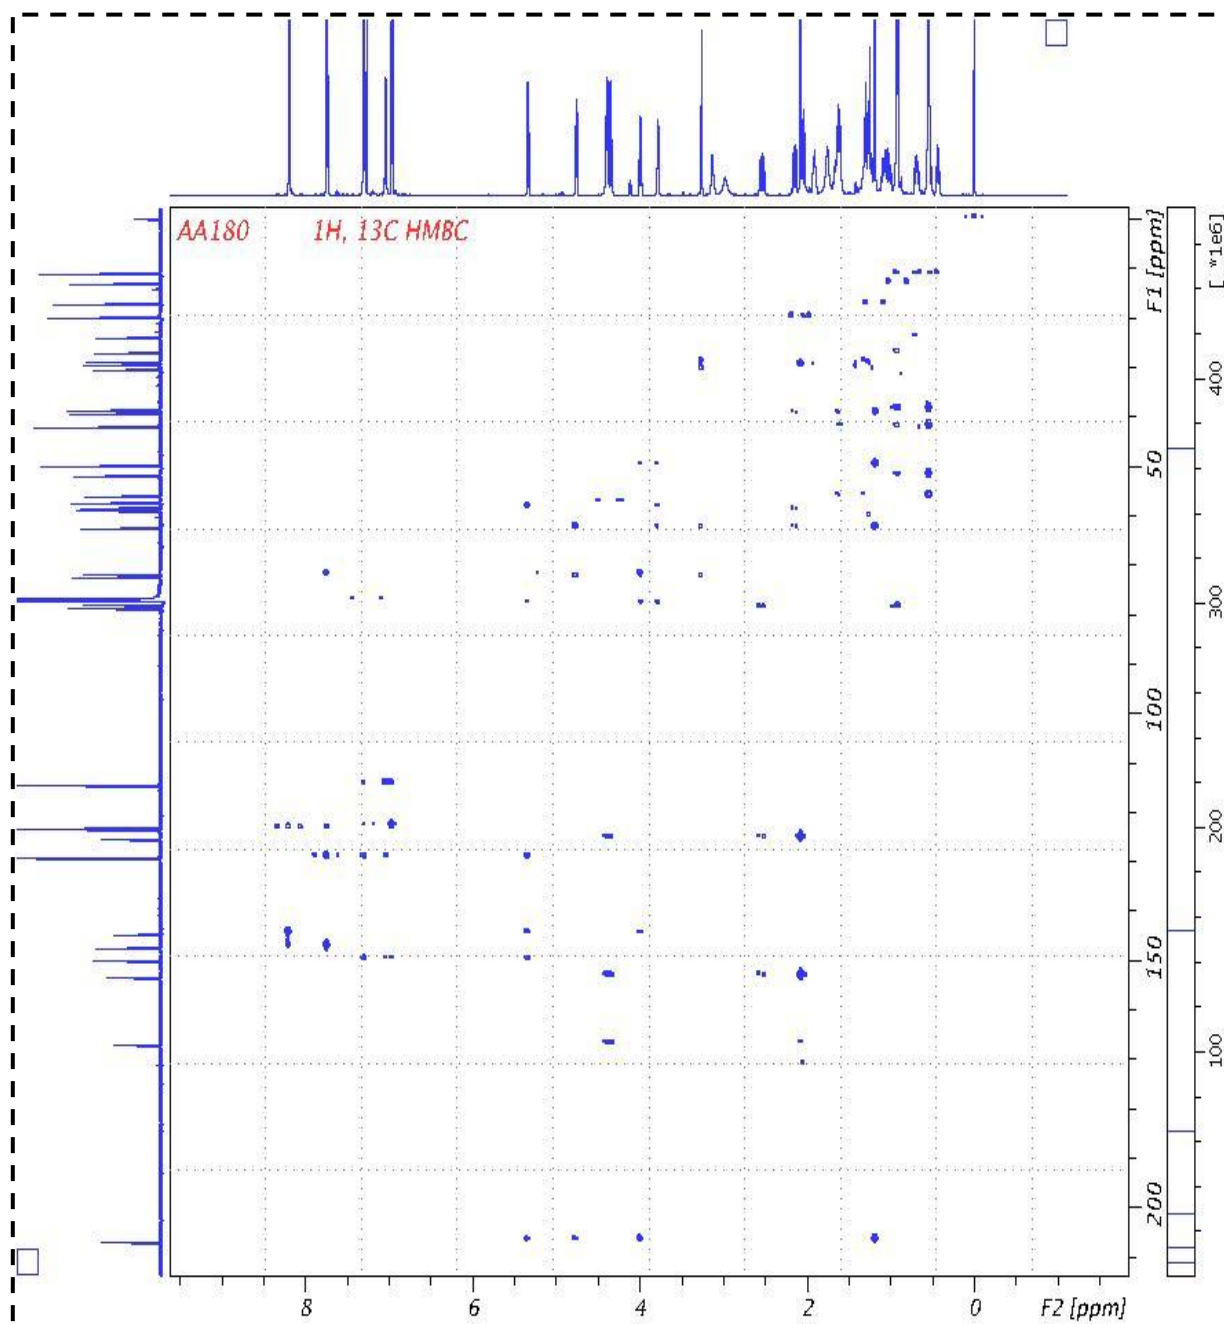

Figure S19: HMBC of Compound 3A

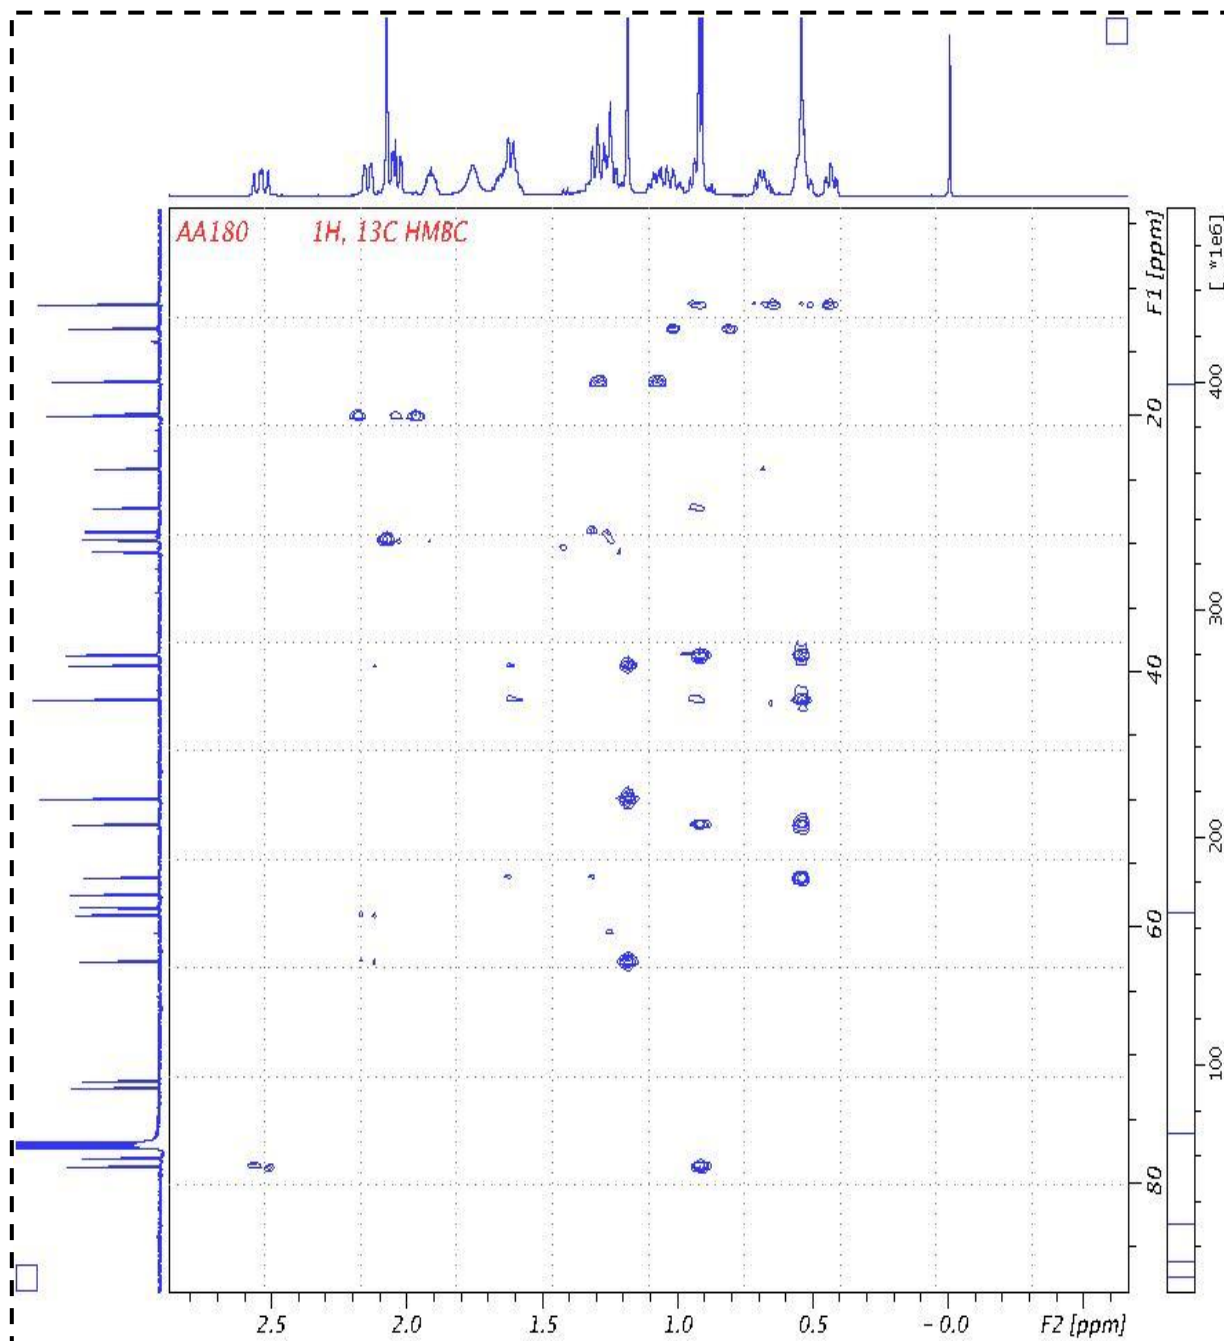

Figure S20: HSQC of Compound 3A

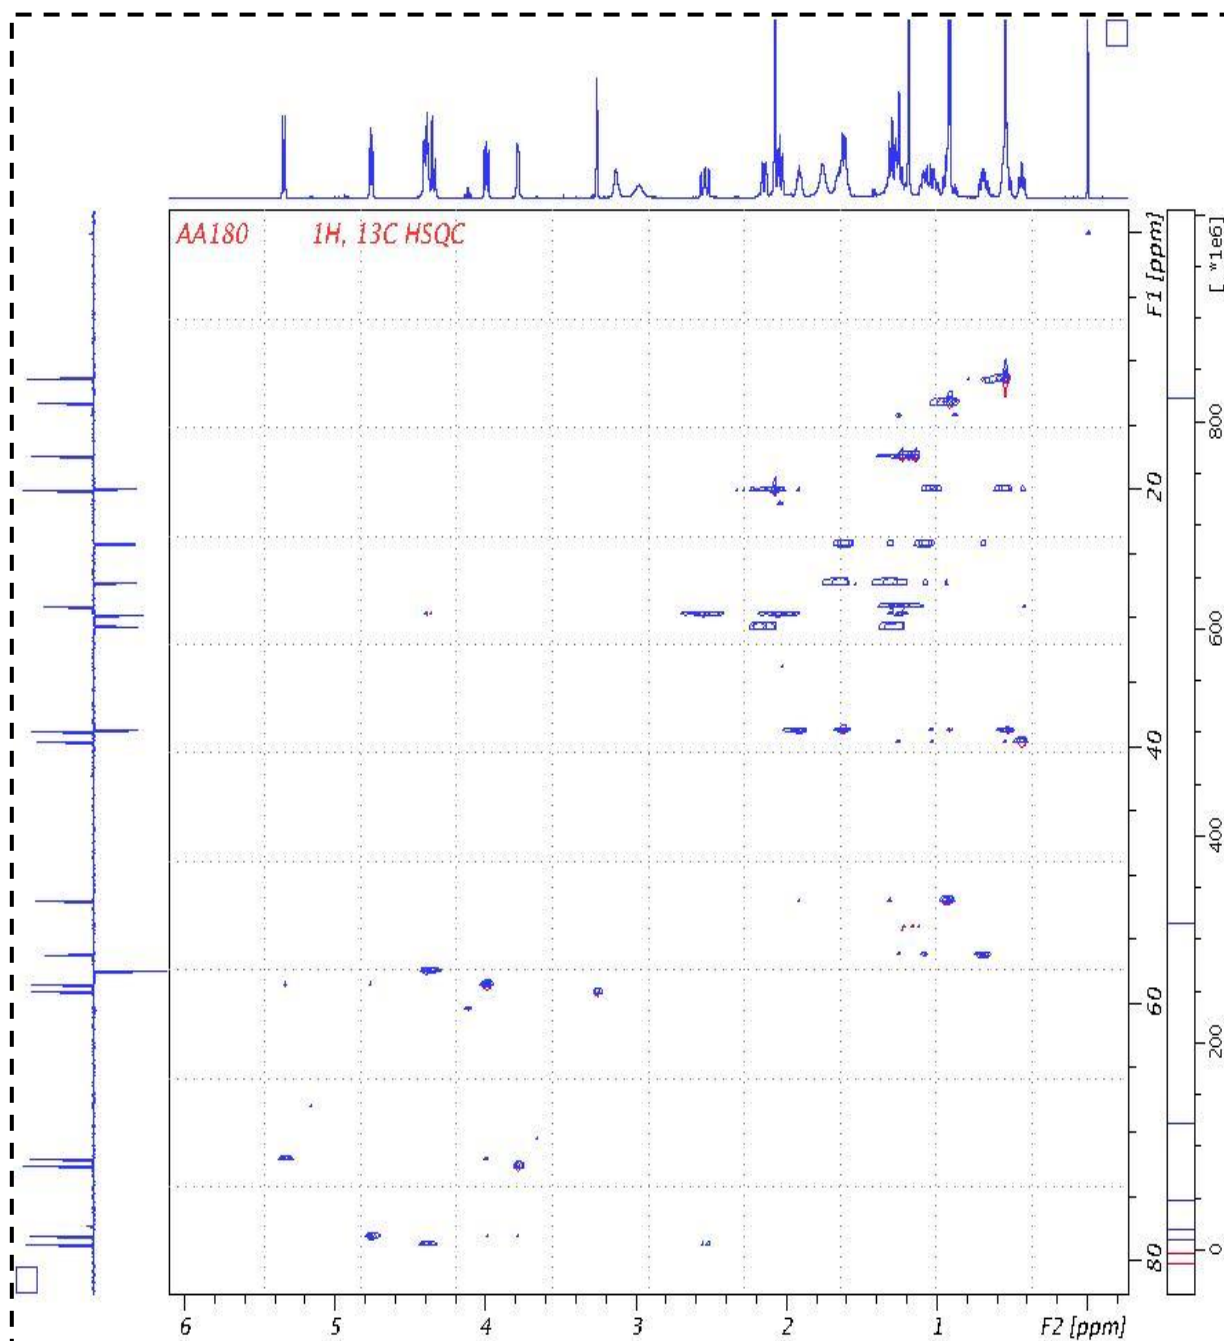

Figure S21: HPLC Profile of Compound 3B

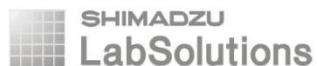

# Analysis Report

## <Sample Information>

Sample Name : BRN  
 Sample ID : BRN  
 Data Filename : BRN1.lcd  
 Method Filename : BASELINE.lcm  
 Batch Filename :  
 Vial # : 1-2  
 Injection Volume : 10 µL  
 Date Acquired : 2/6/2018 3:33:06 PM  
 Date Processed : 2/6/2018 3:53:09 PM

Sample Type : Unknown  
 Acquired by : user  
 Processed by : user

## <Chromatogram>

mAU

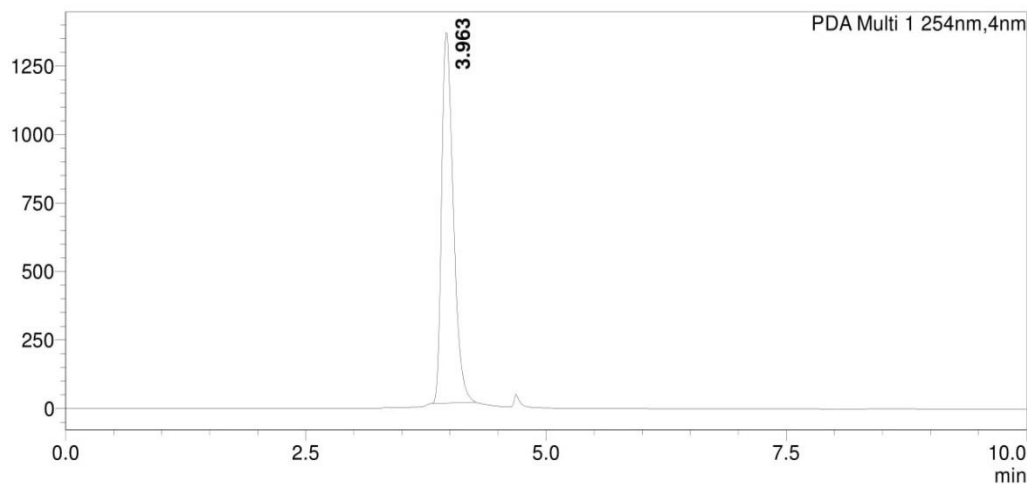

## <Peak Table>

PDA Ch1 254nm

| Peak# | Ret. Time | Area     | Height  | Area%   | Height% |
|-------|-----------|----------|---------|---------|---------|
| 1     | 3.963     | 11436622 | 1351555 | 100.000 | 100.000 |
| Total |           | 11436622 | 1351555 | 100.000 | 100.000 |

**Figure S22: Mass Spectra of Compound 3B**

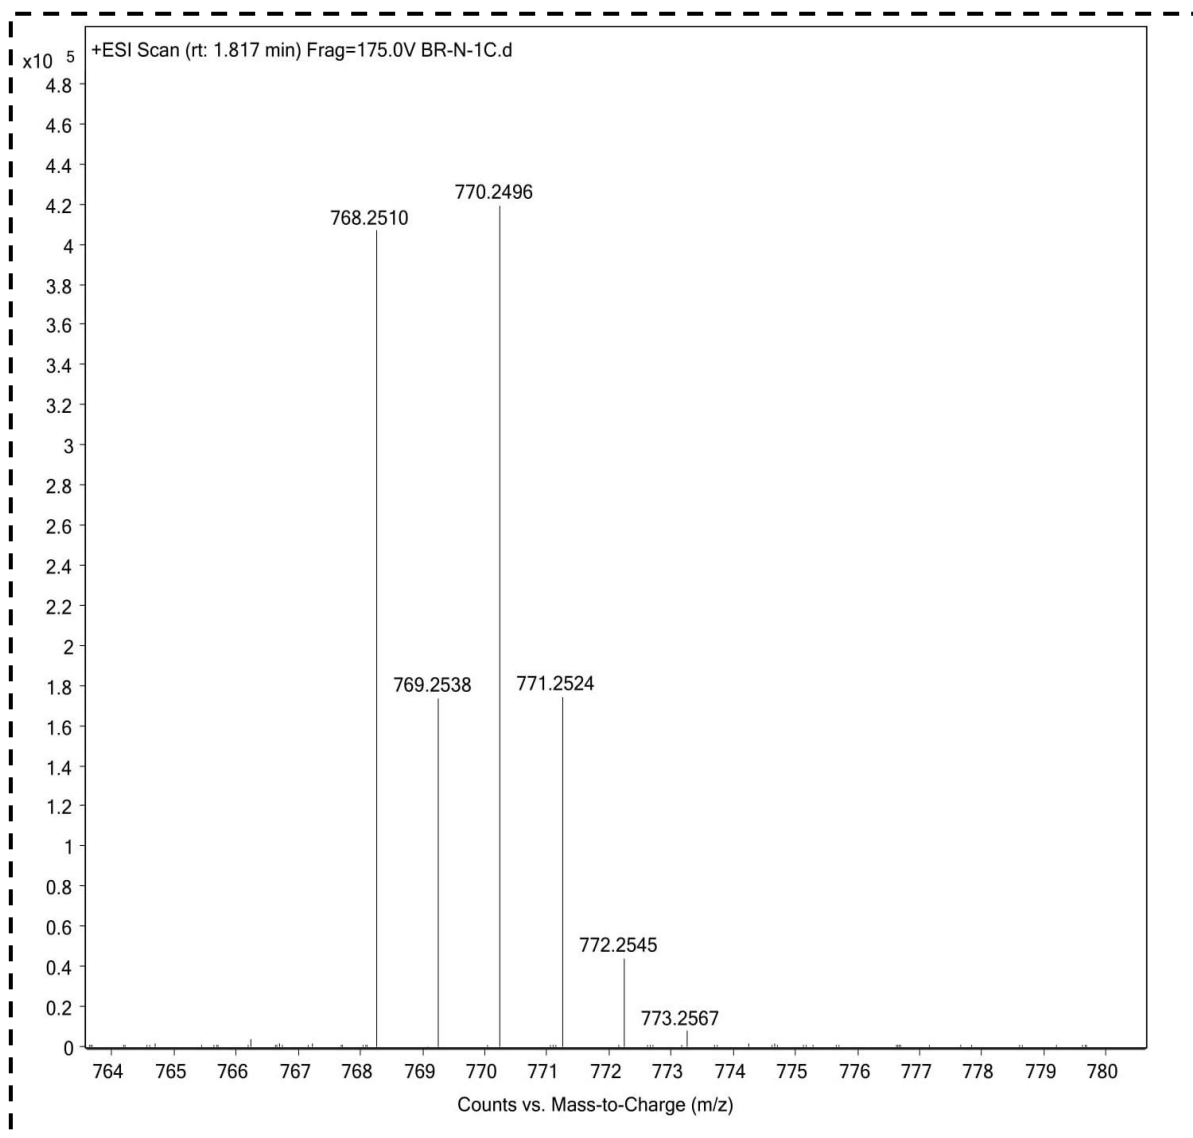

Figure S23:  $^1\text{H}$  NMR of Compound 3B

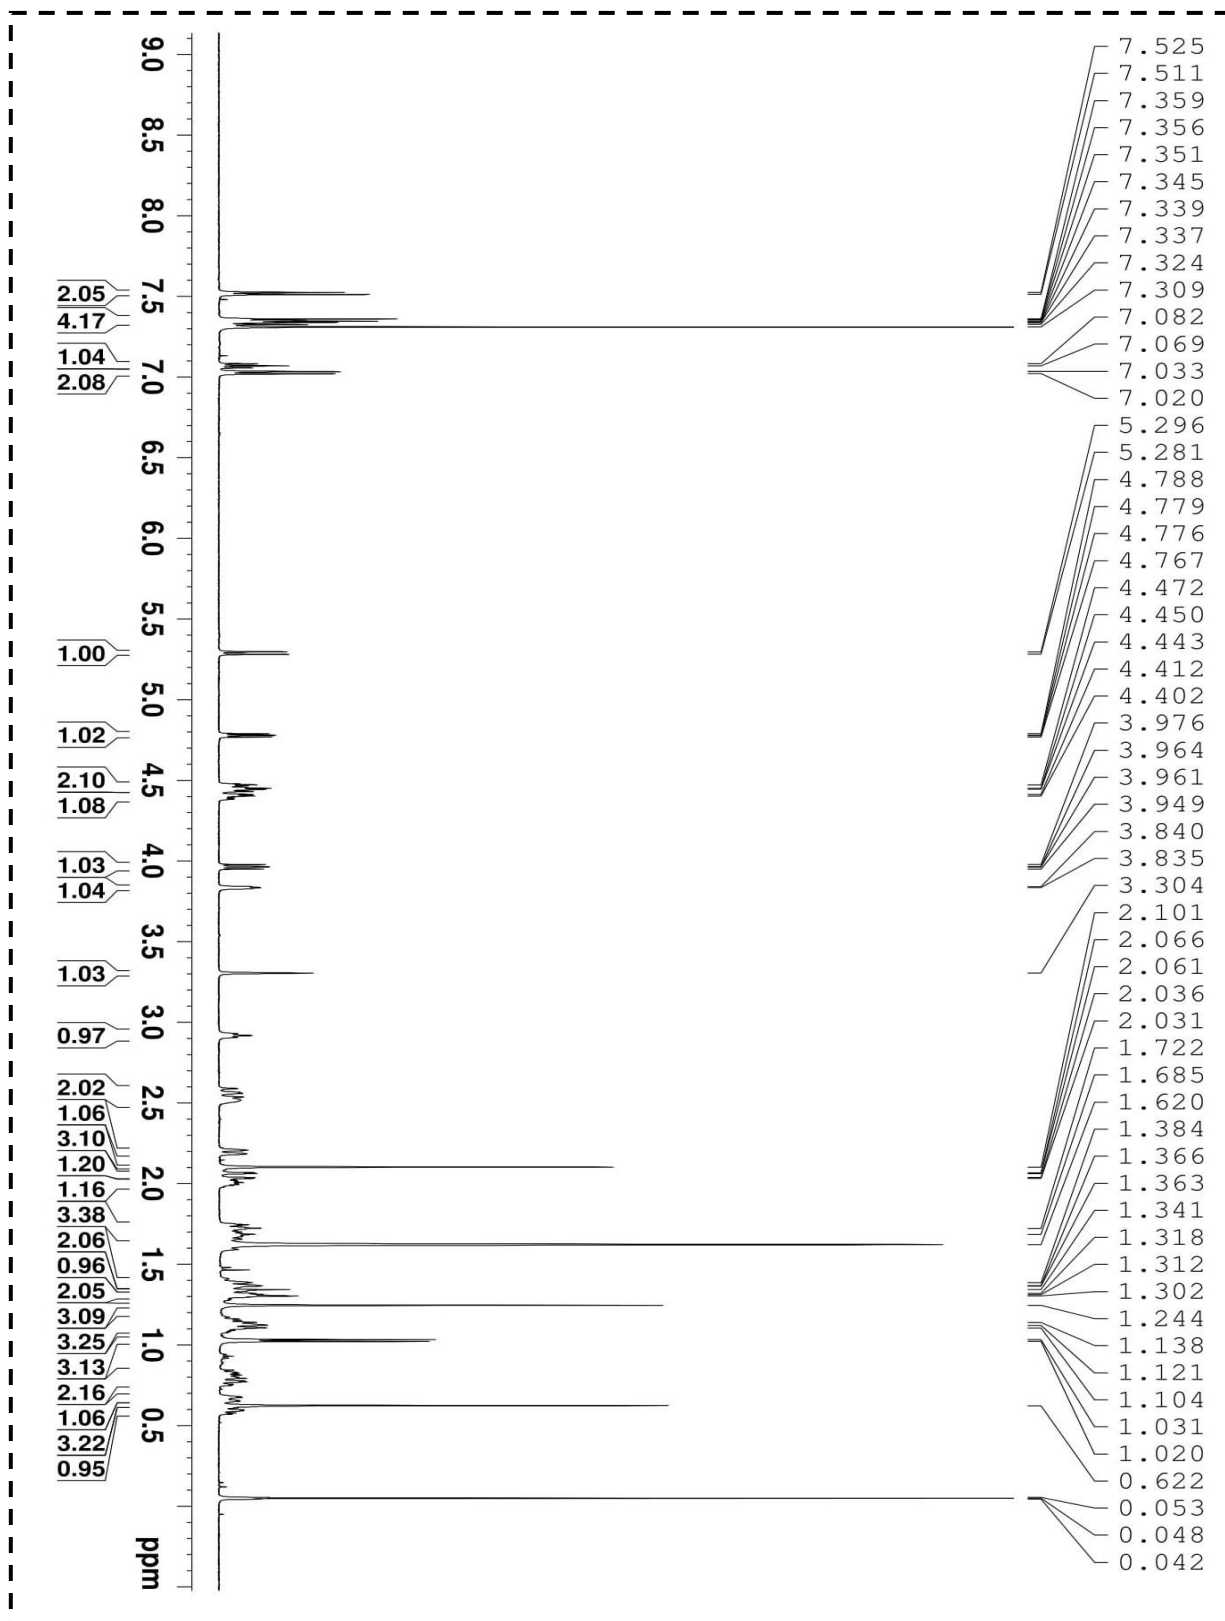



Figure S24:  $^1\text{H}$  NMR of Compound 3B

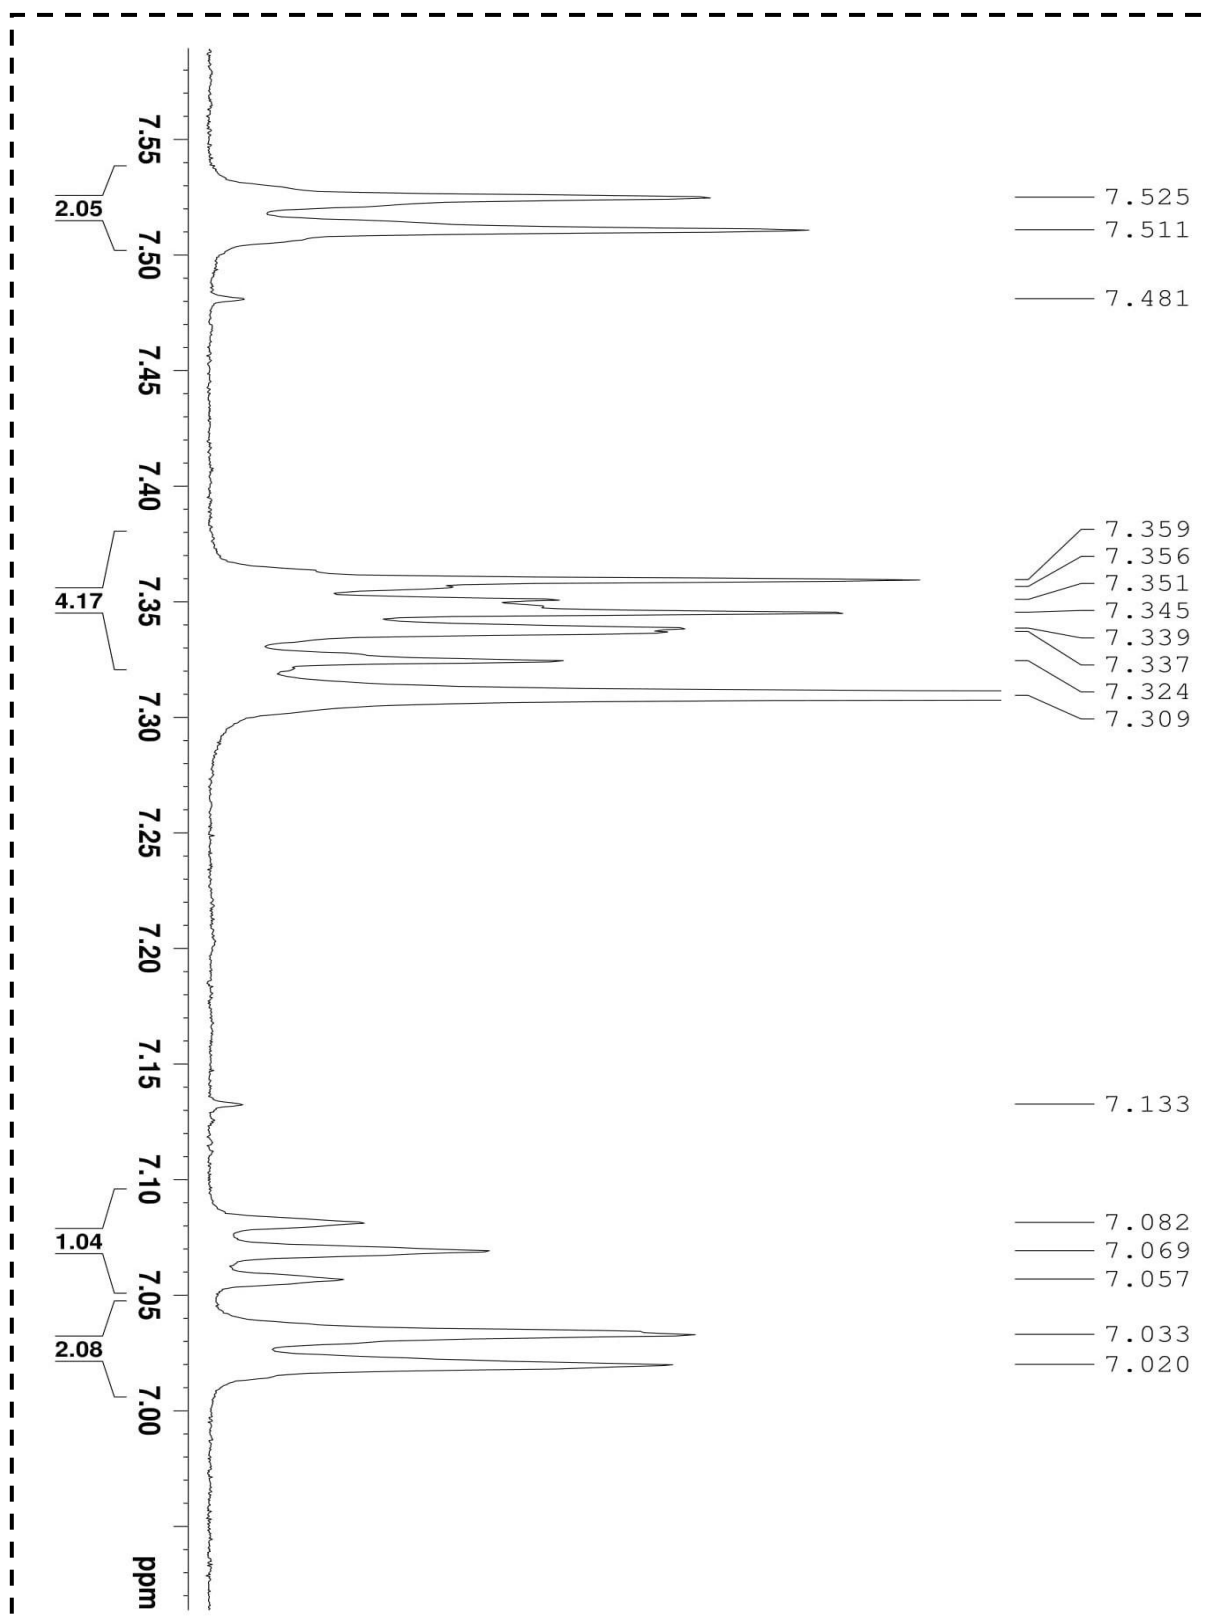

Figure S25:  $^1\text{H}$  NMR of Compound 3B

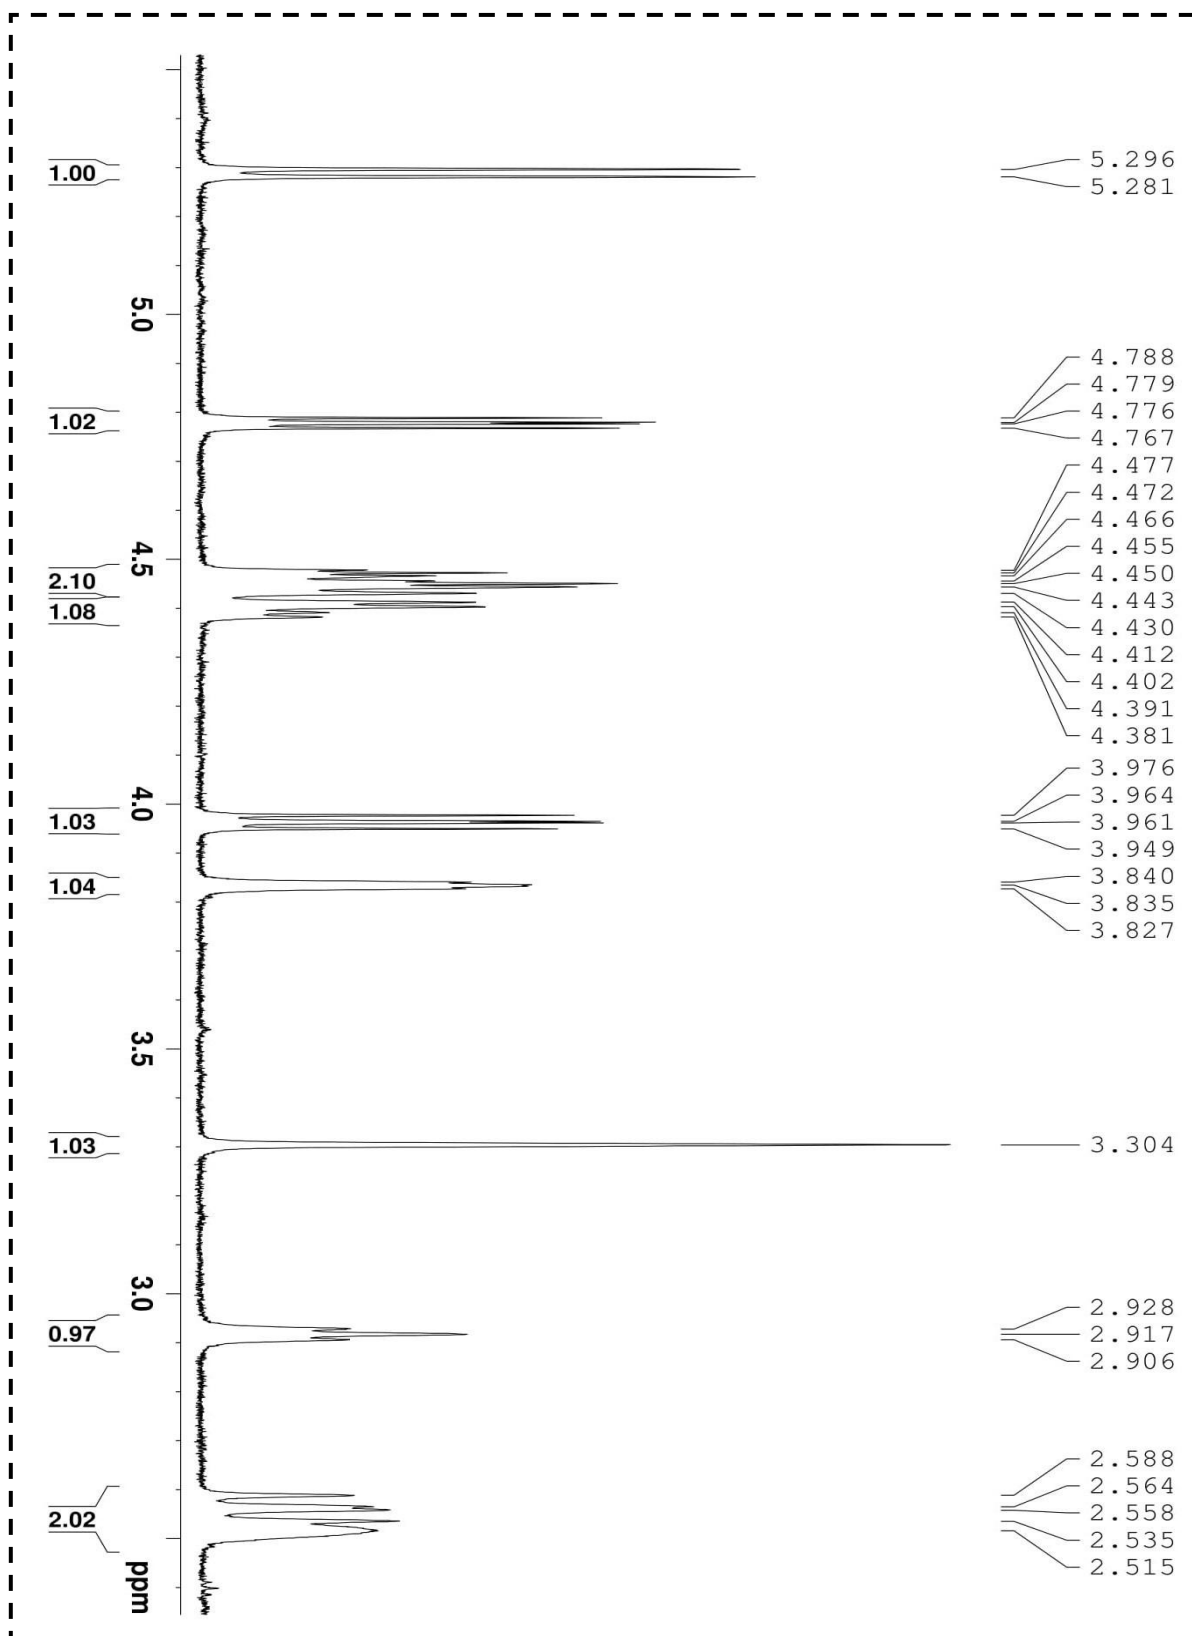

Figure S26:  $^1\text{H}$  NMR of Compound 3B

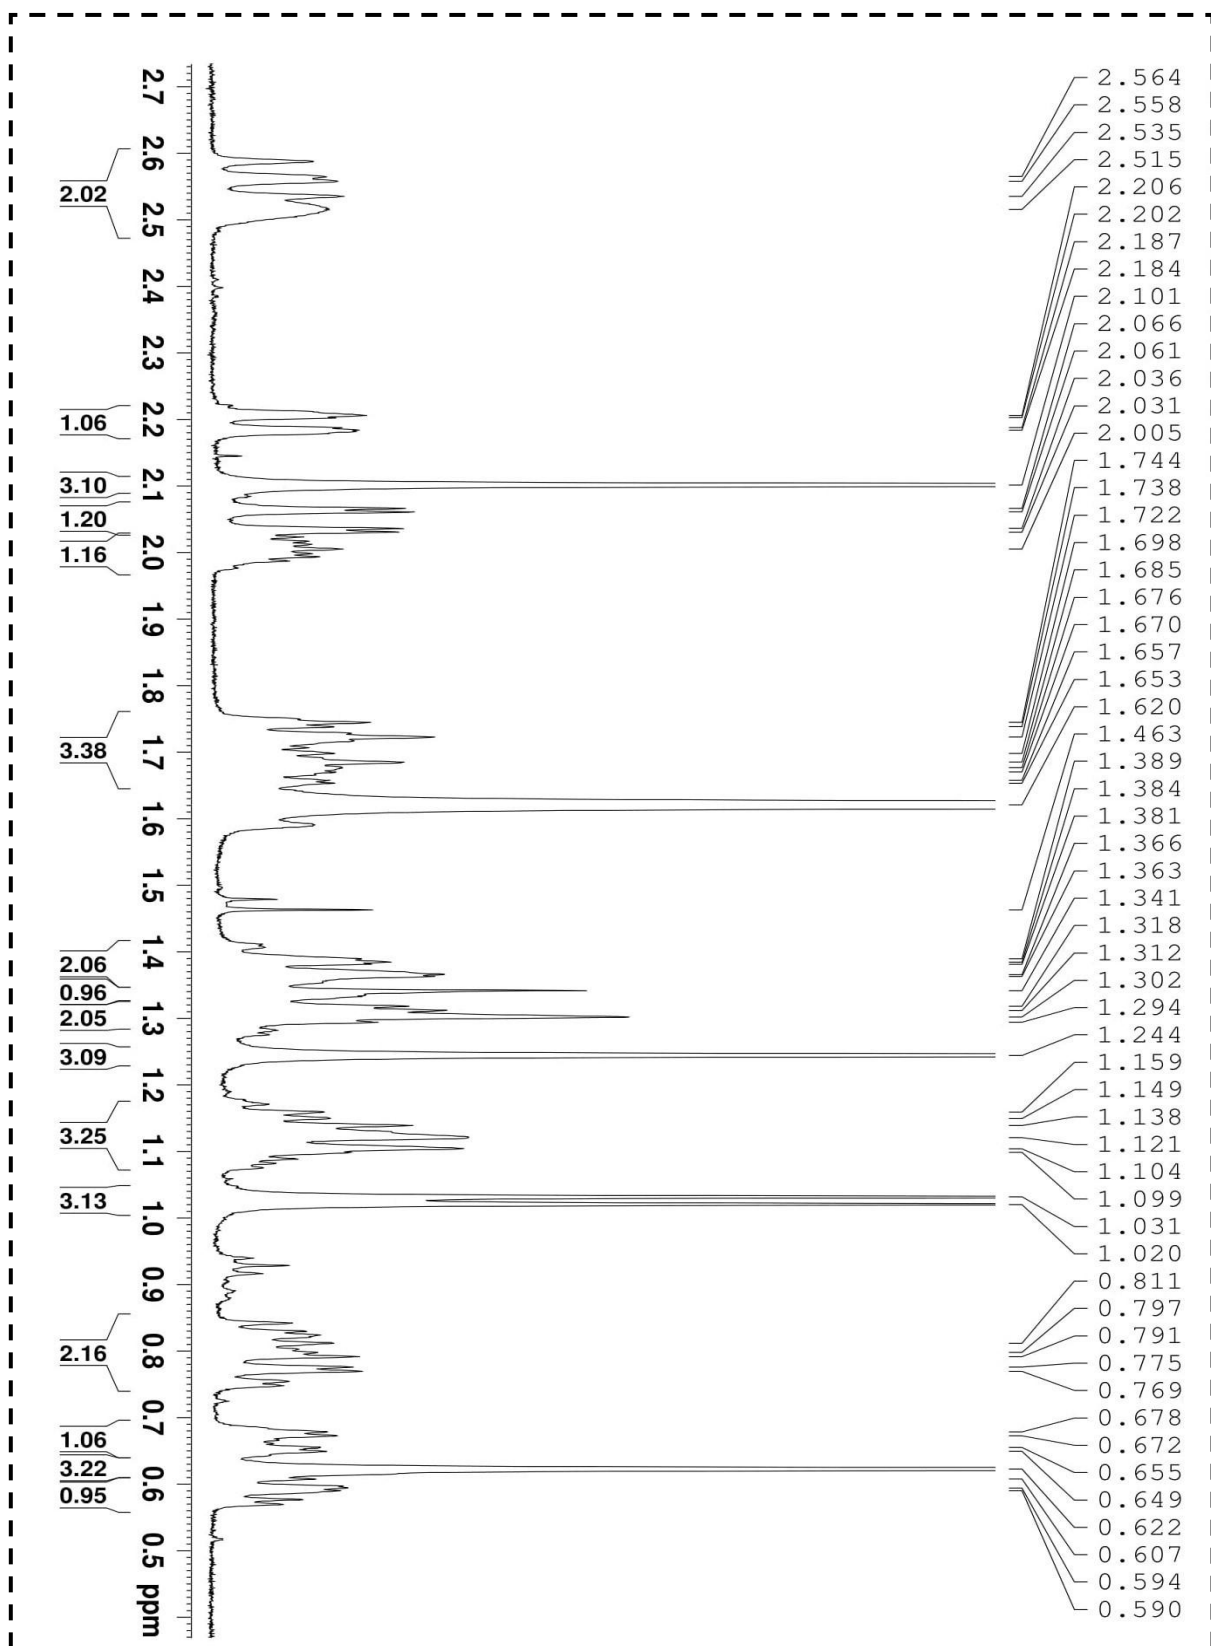

Figure S27:  $^{13}\text{C}$  NMR of Compound 3B

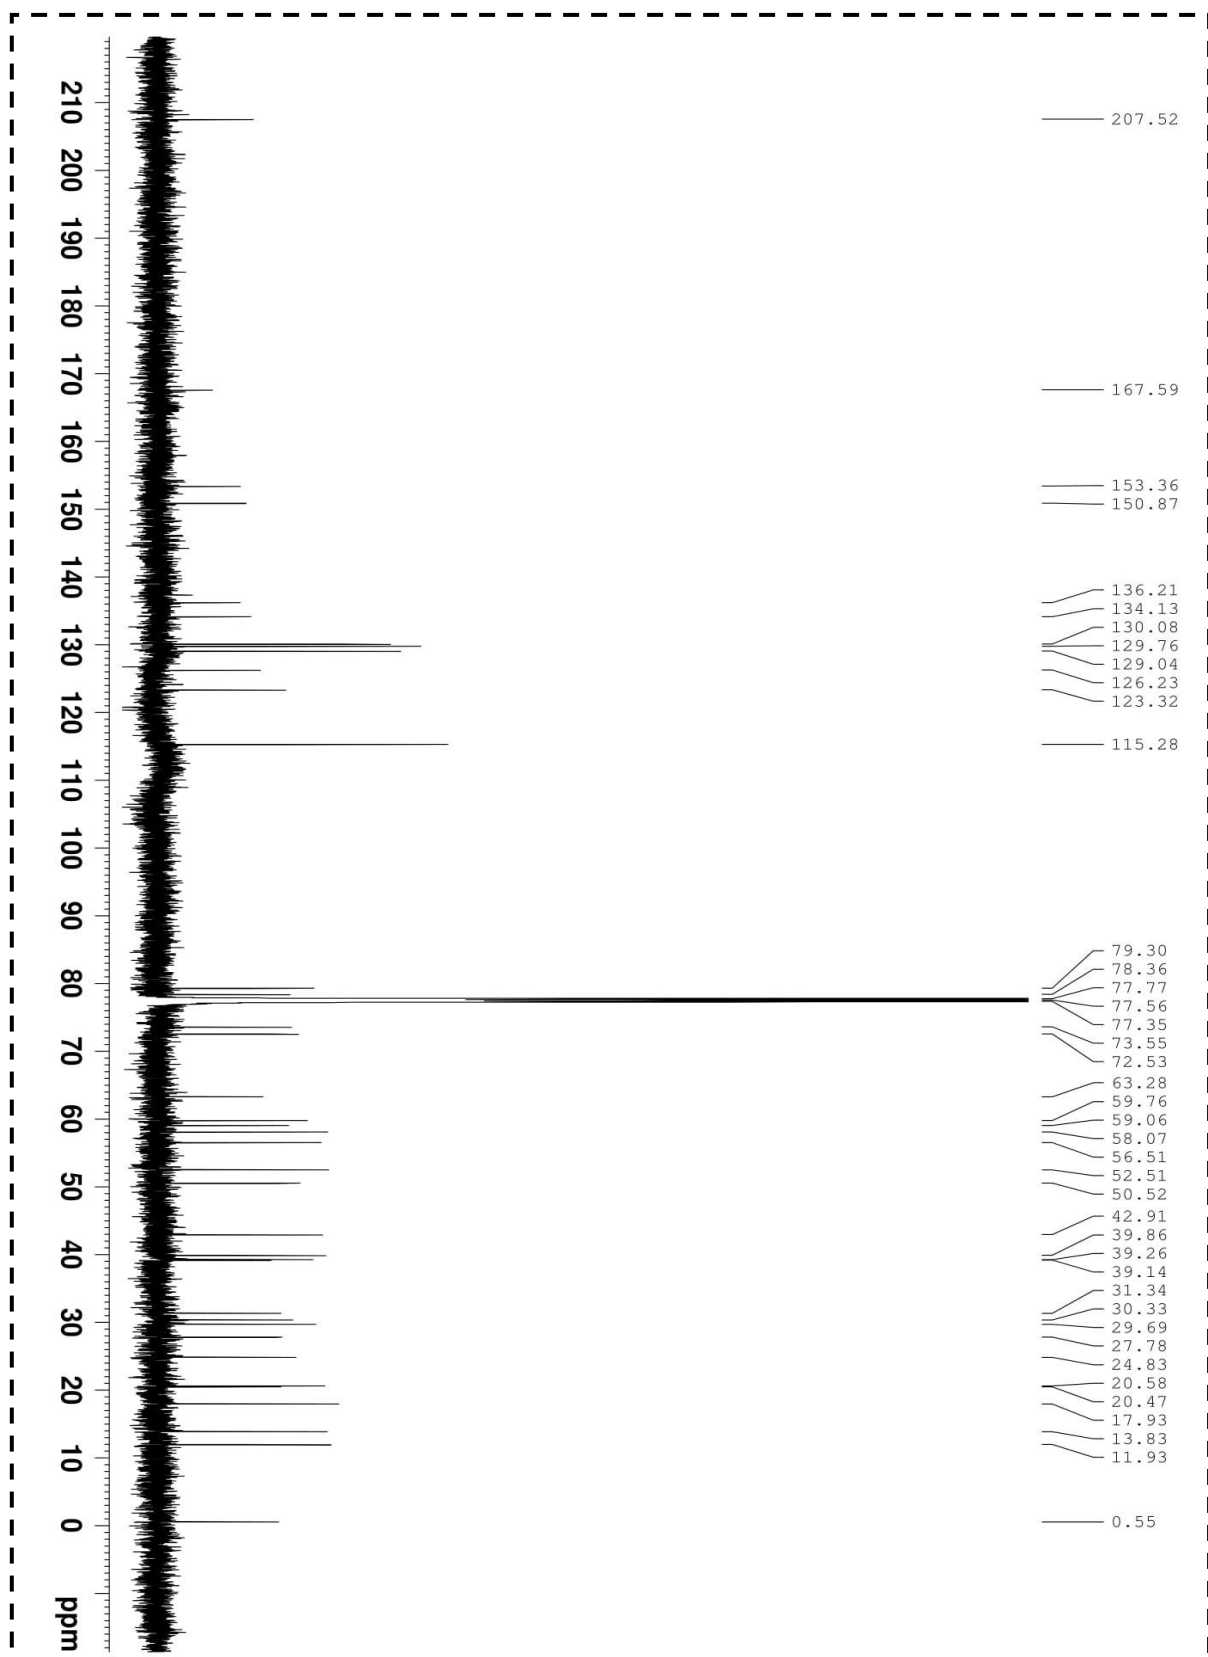

Figure S28: DEPT 90 of Compound 3B

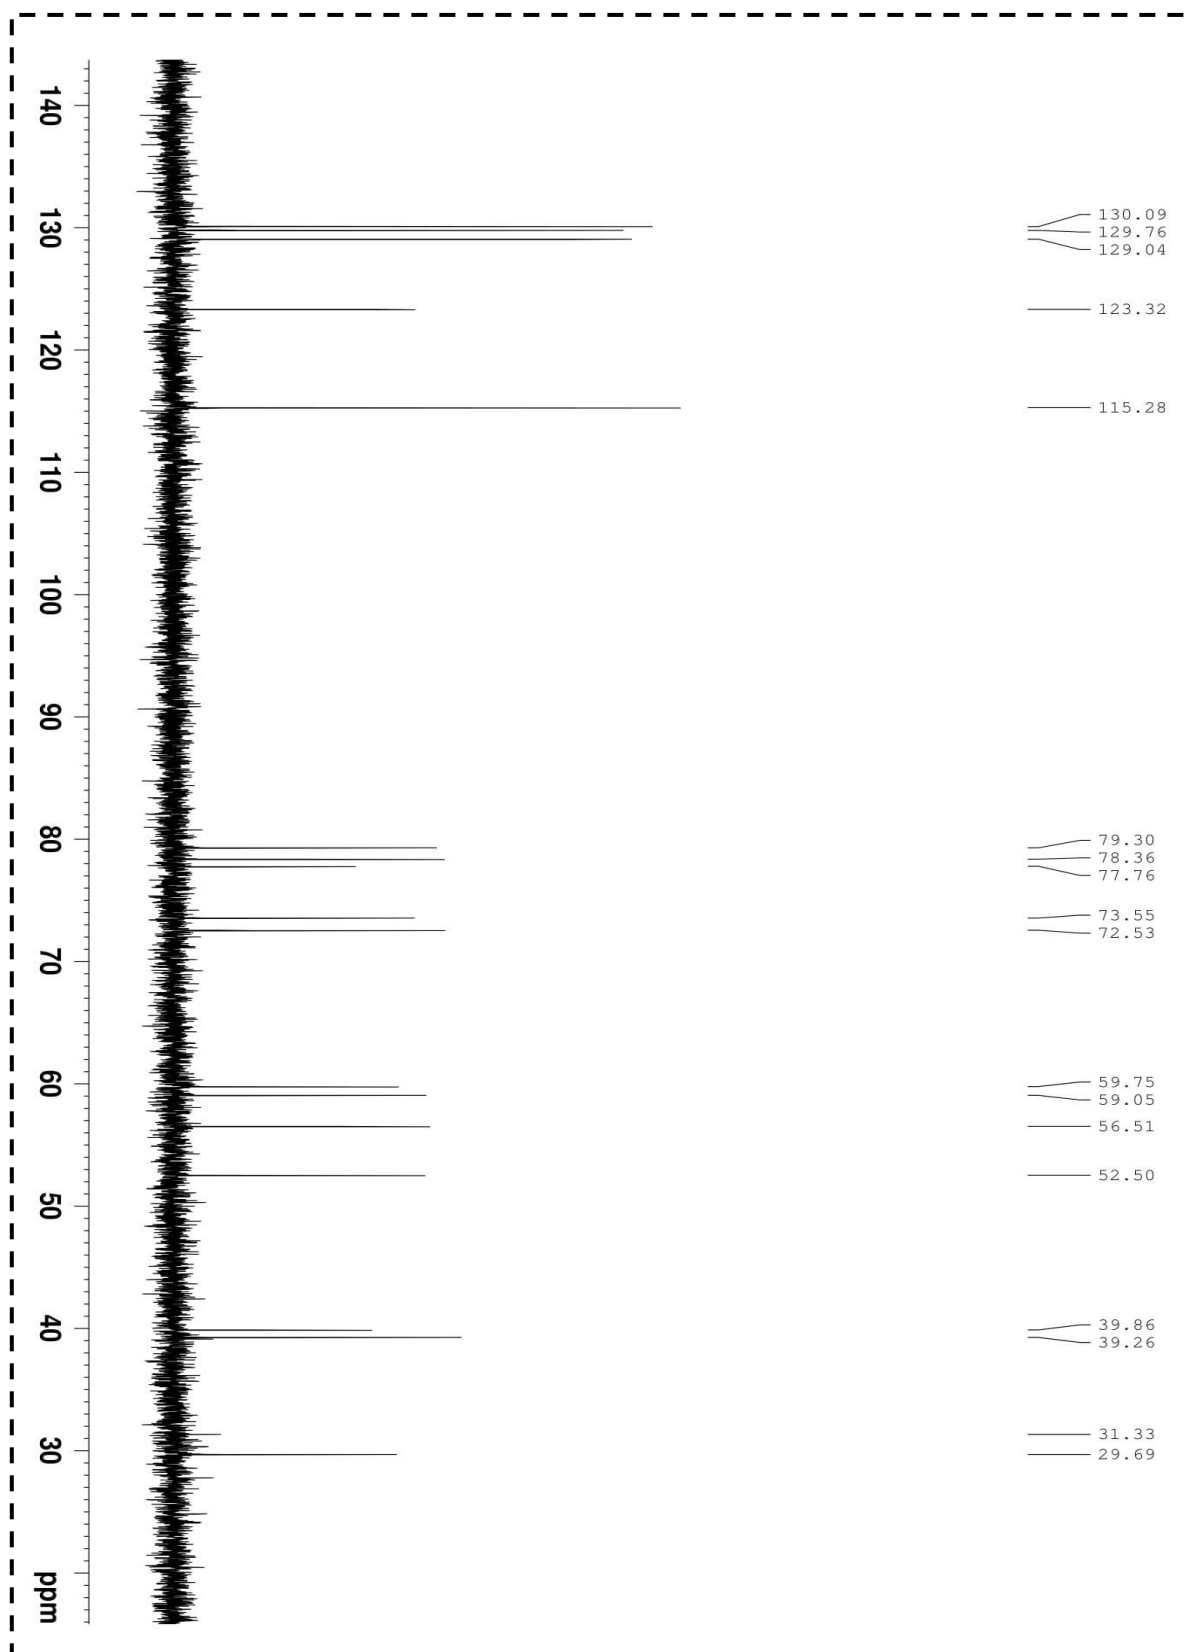

Figure S29: DEPT 135 of Compound 3B

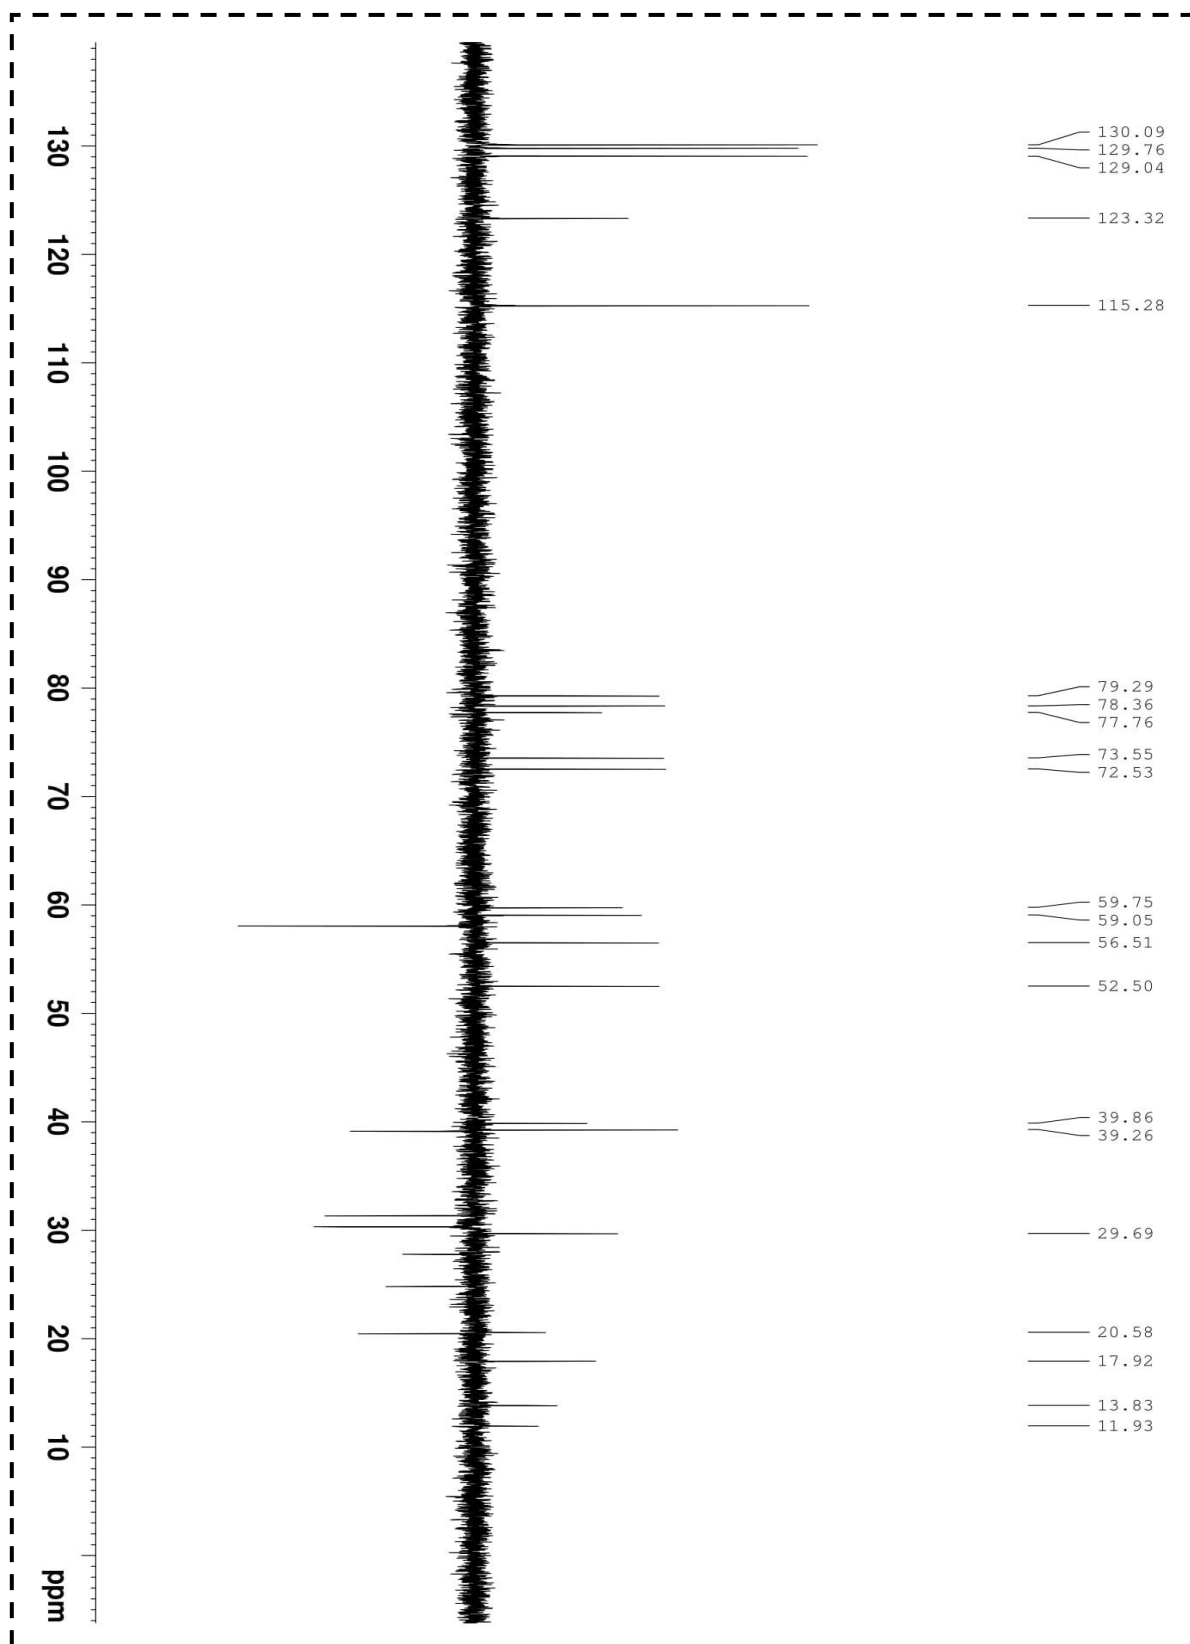

Figure S30: HPLC Profile of Compound 3C

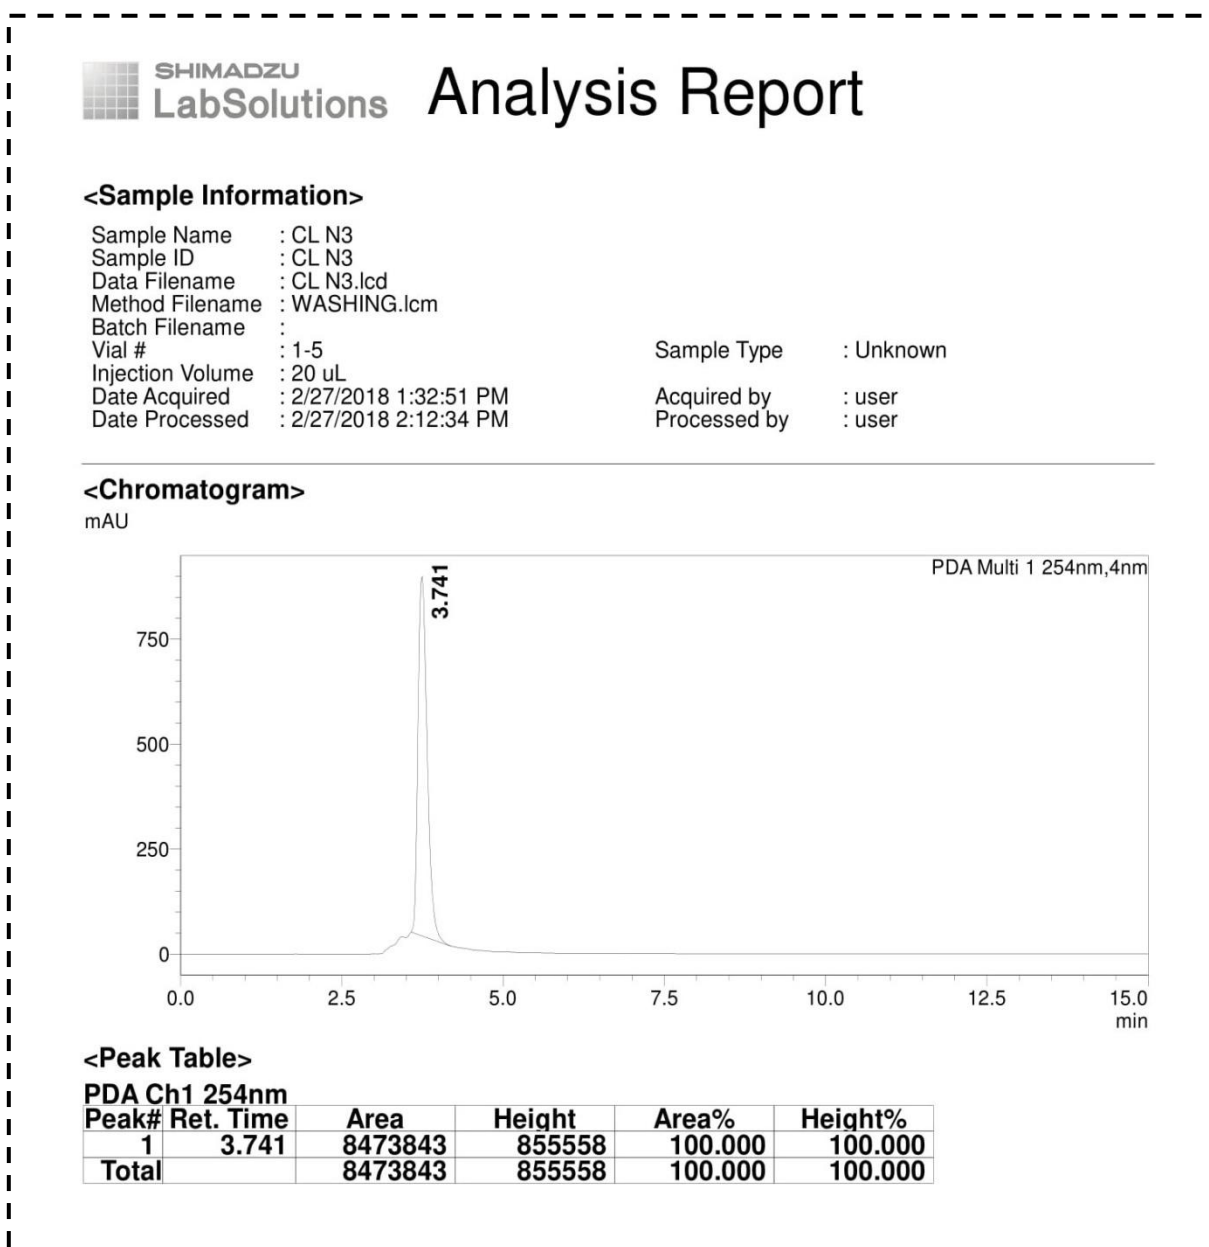

**Figure S31: Mass Spectra of Compound 3C**

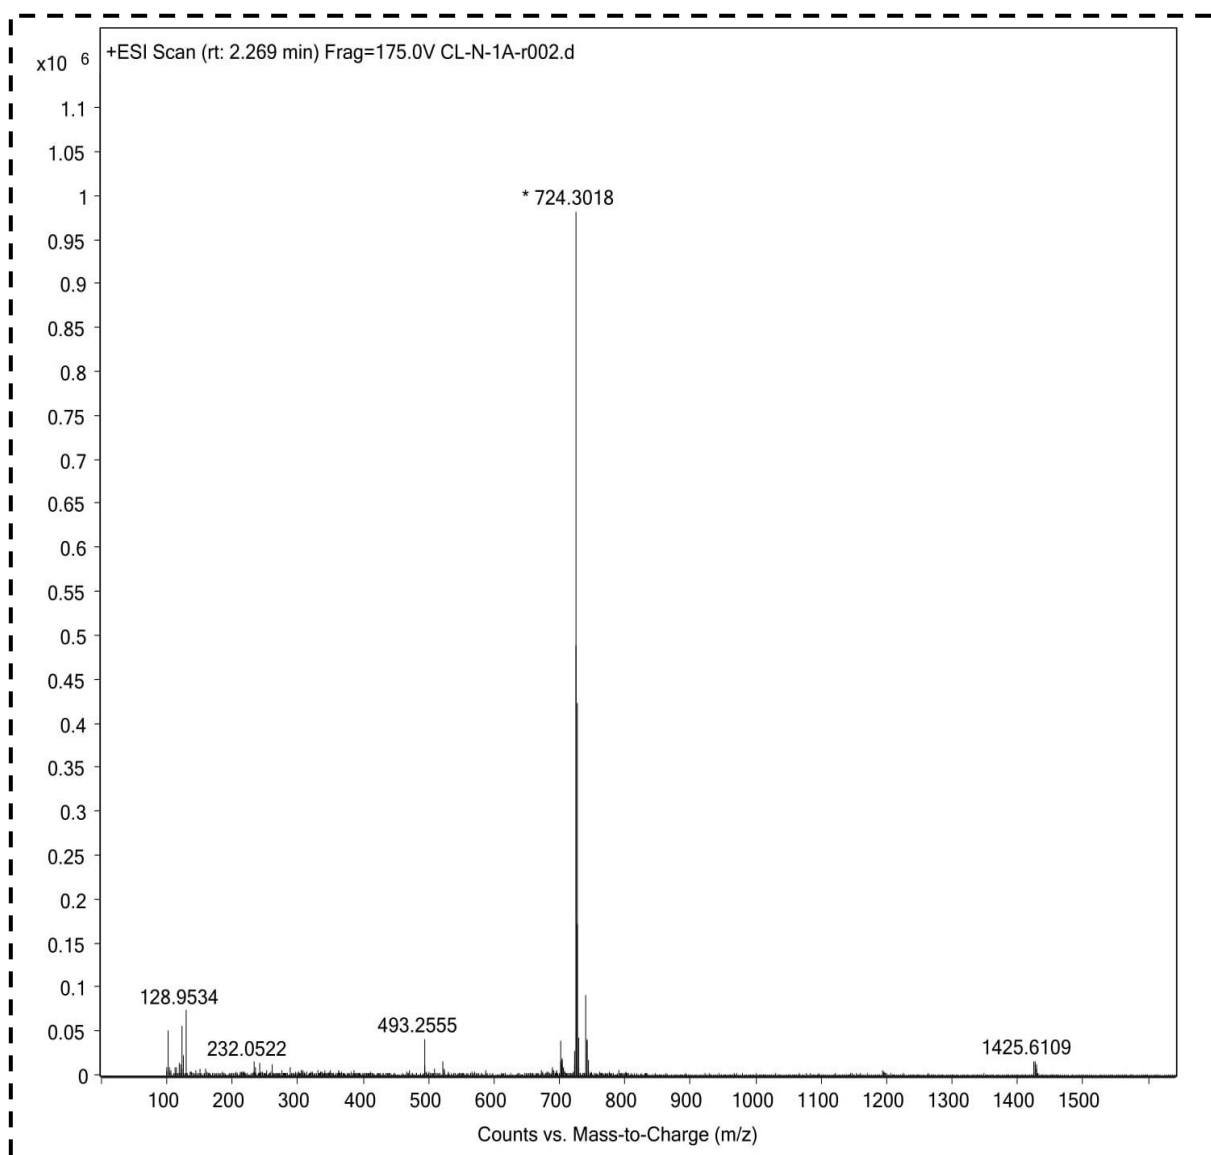



Figure S32:  $^1\text{H}$  NMR of Compound 3C

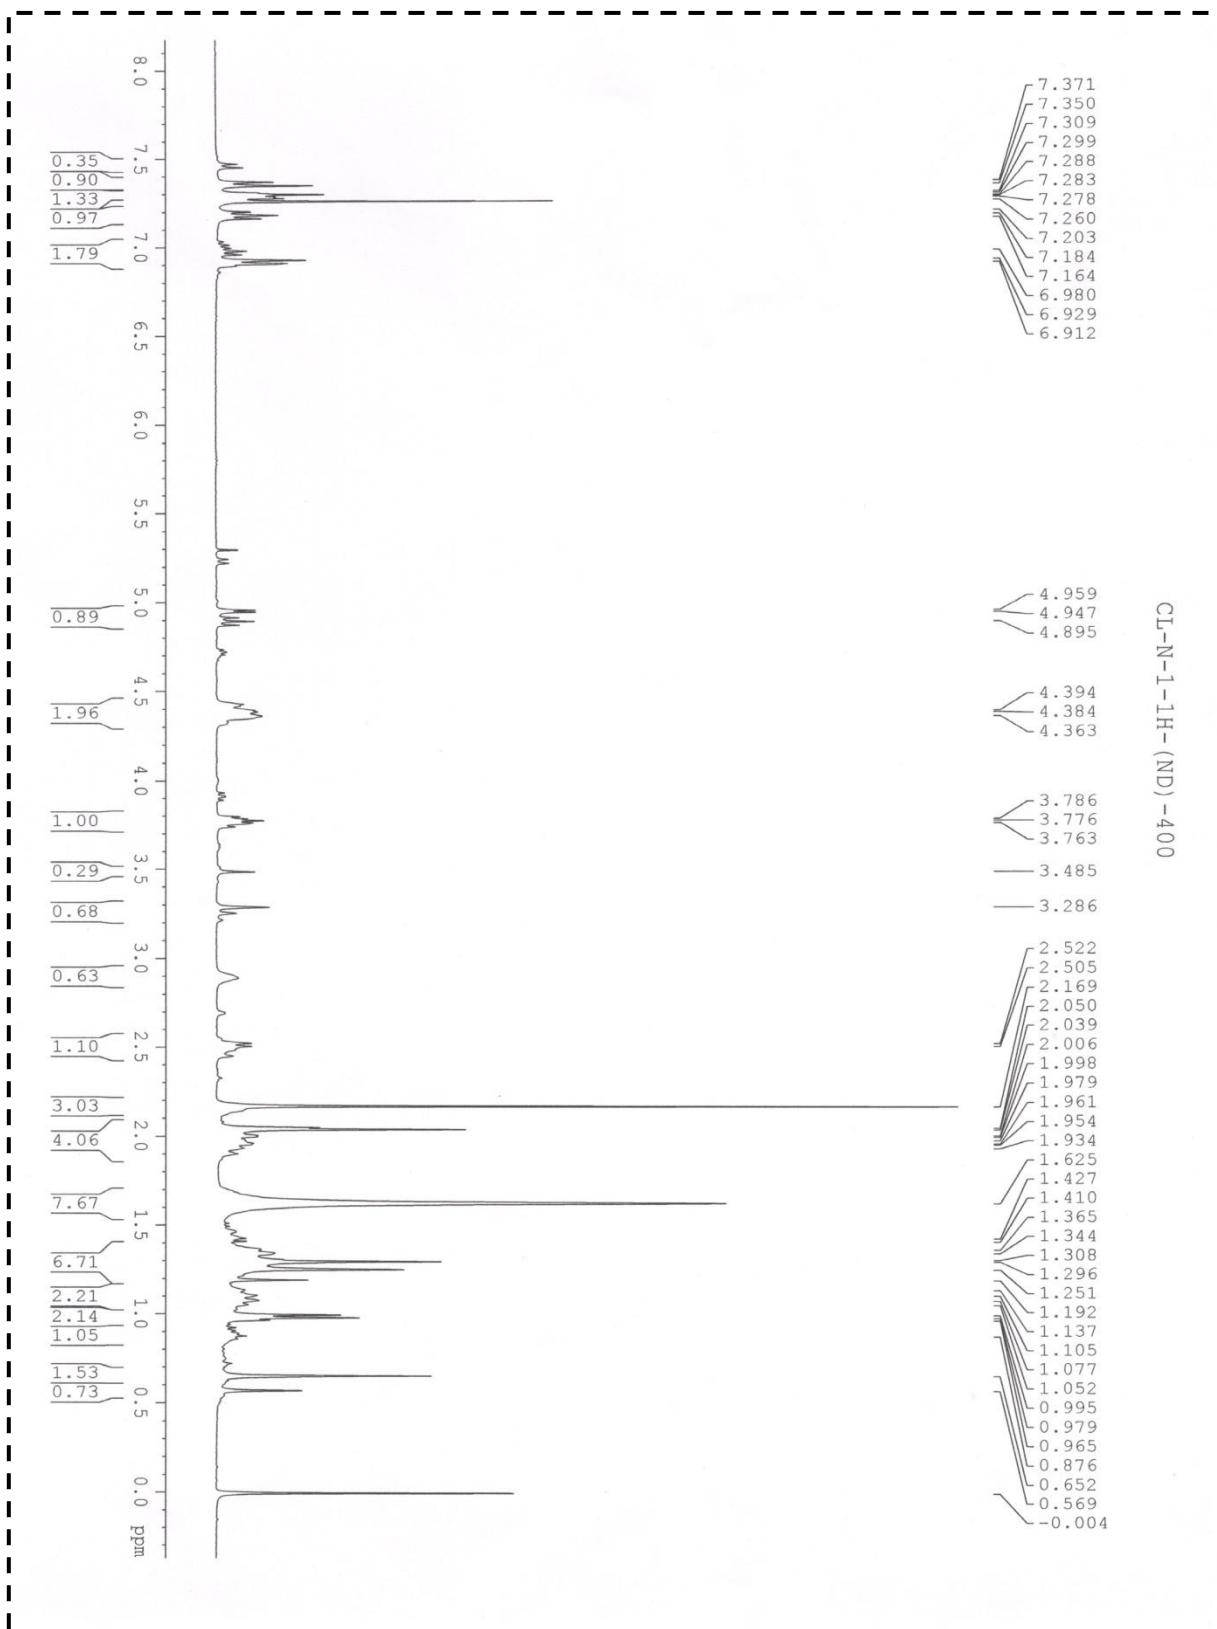

Figure S33:  $^{13}\text{C}$  NMR of Compound 3C

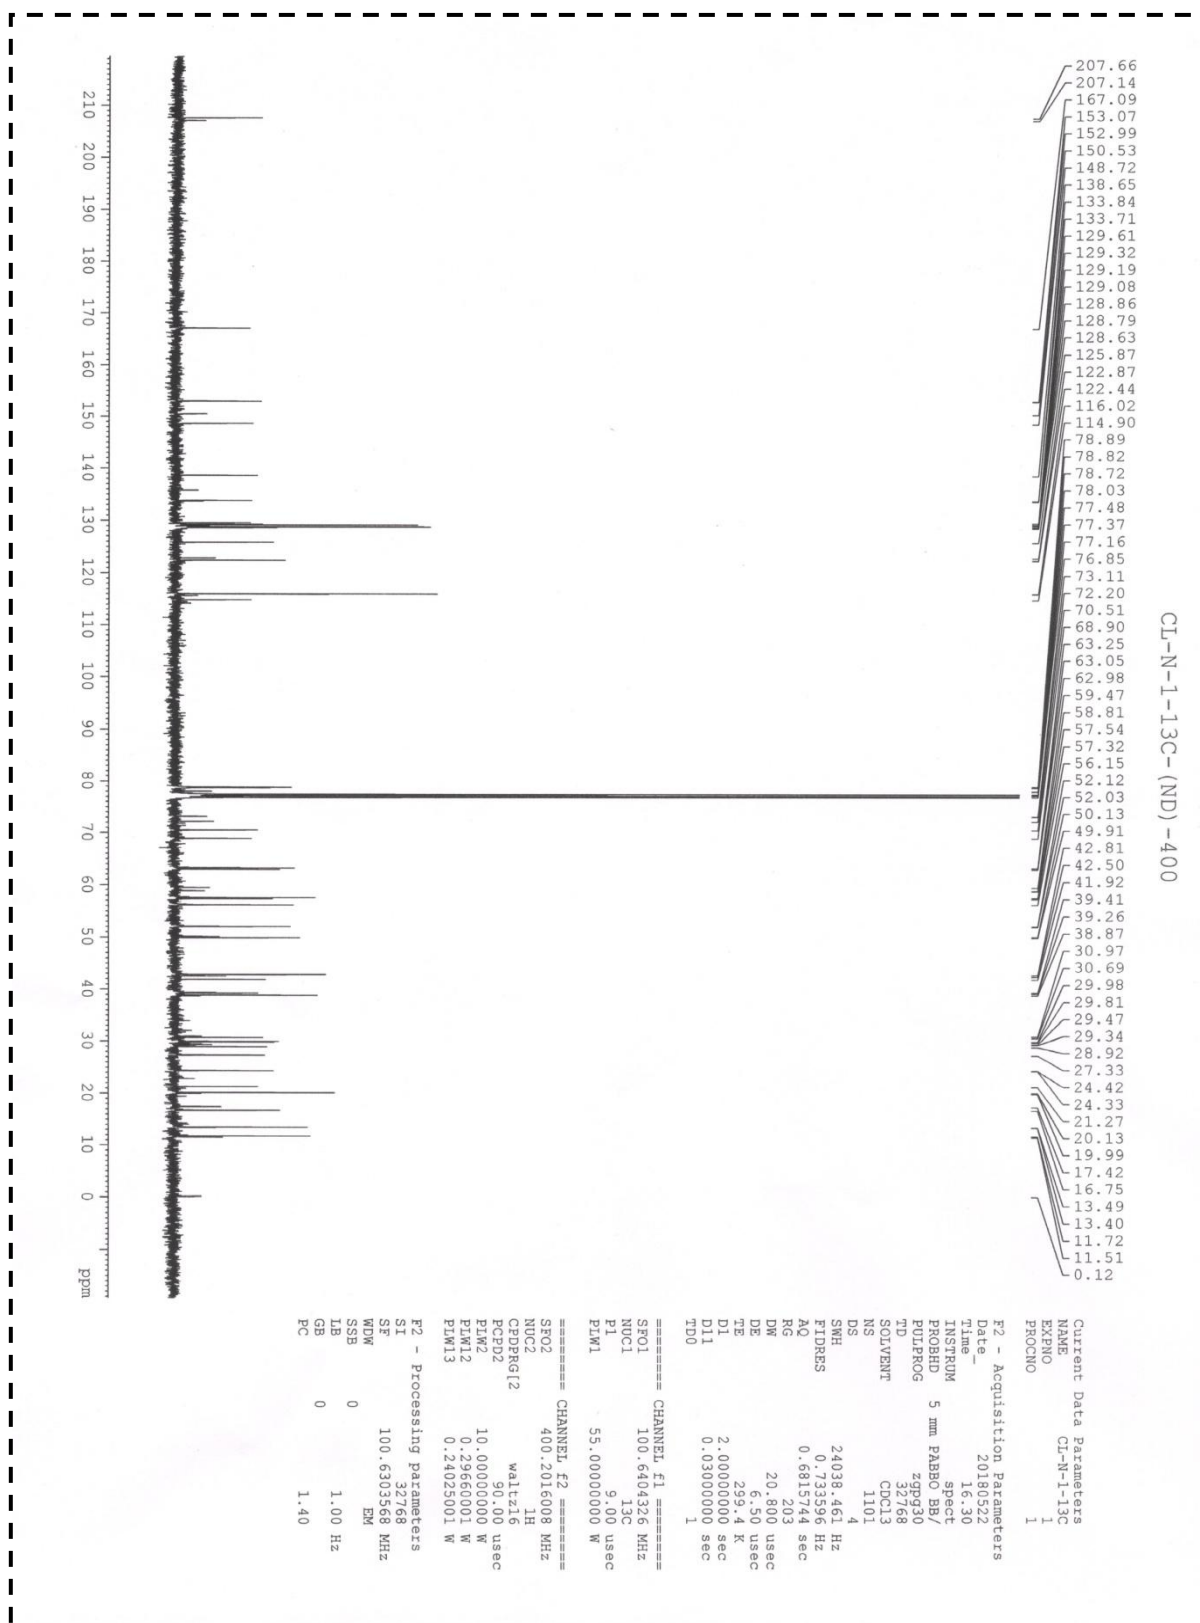

Figure S34: DEPT 90 of Compound 3C

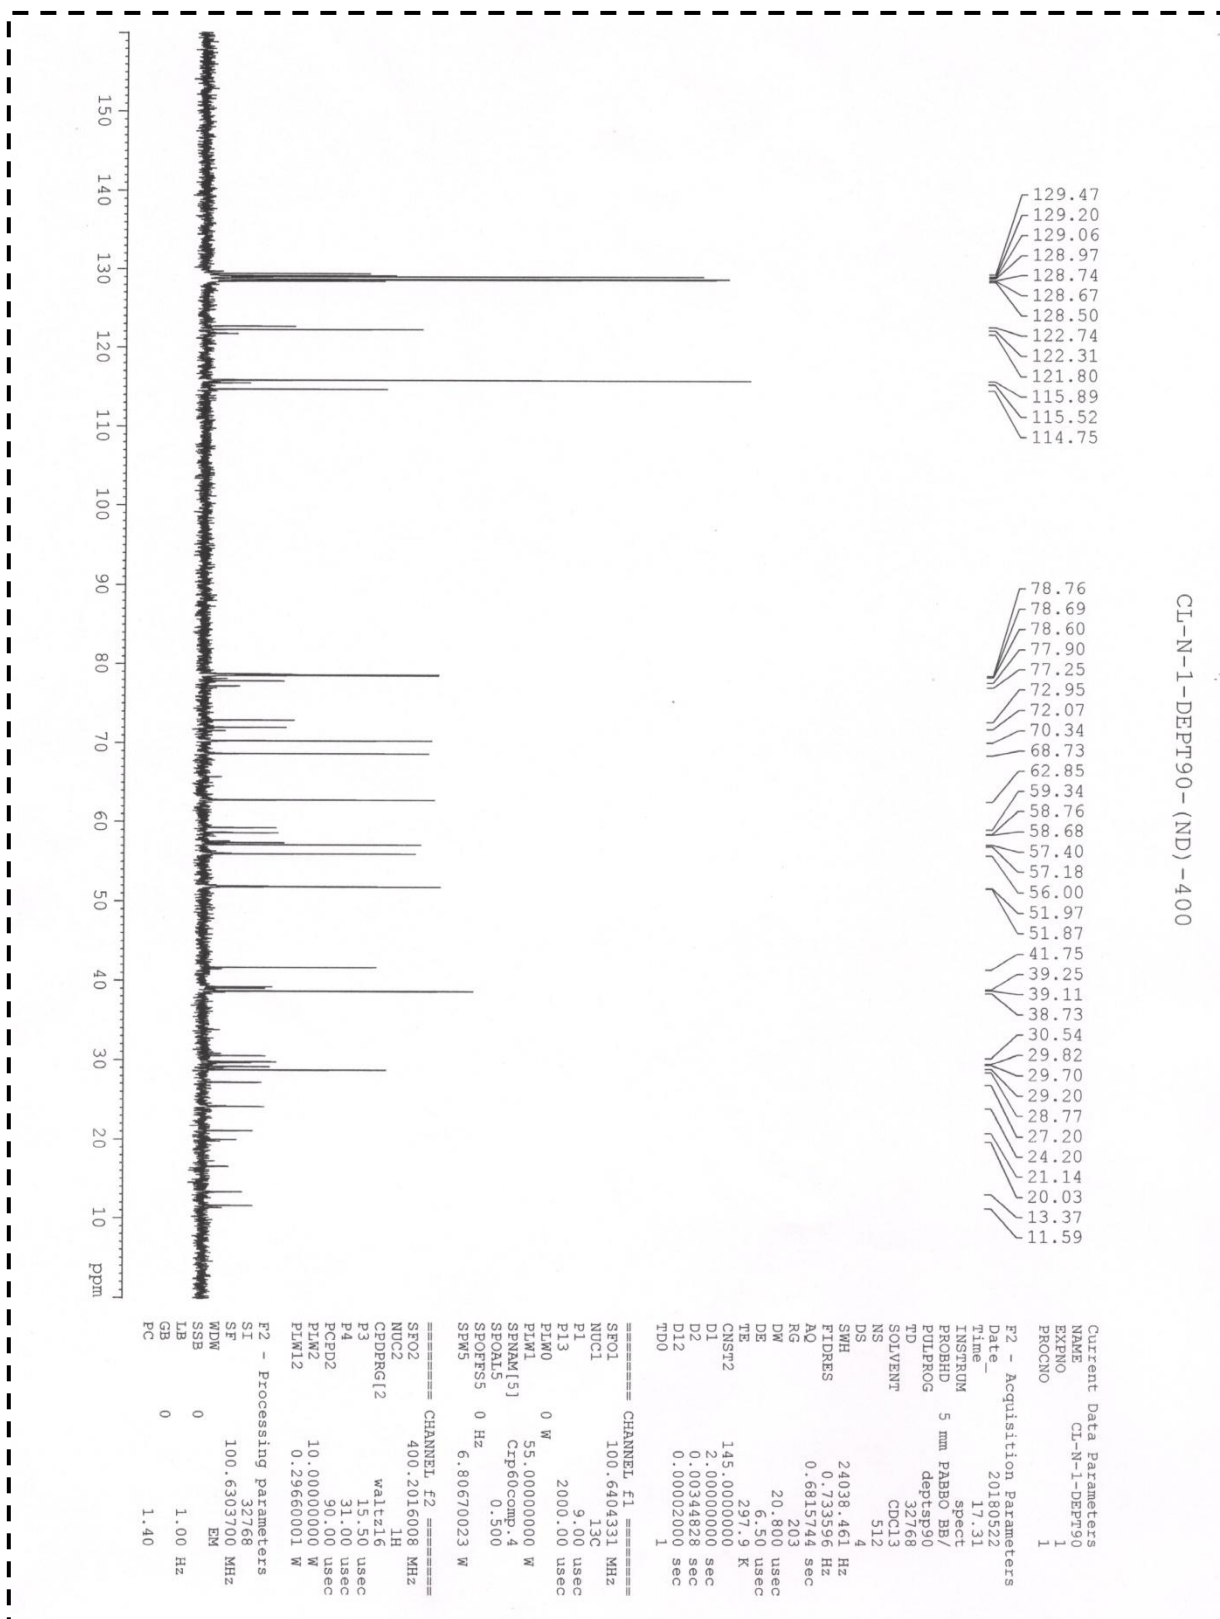

Figure S35: DEPT 135 of Compound 3C

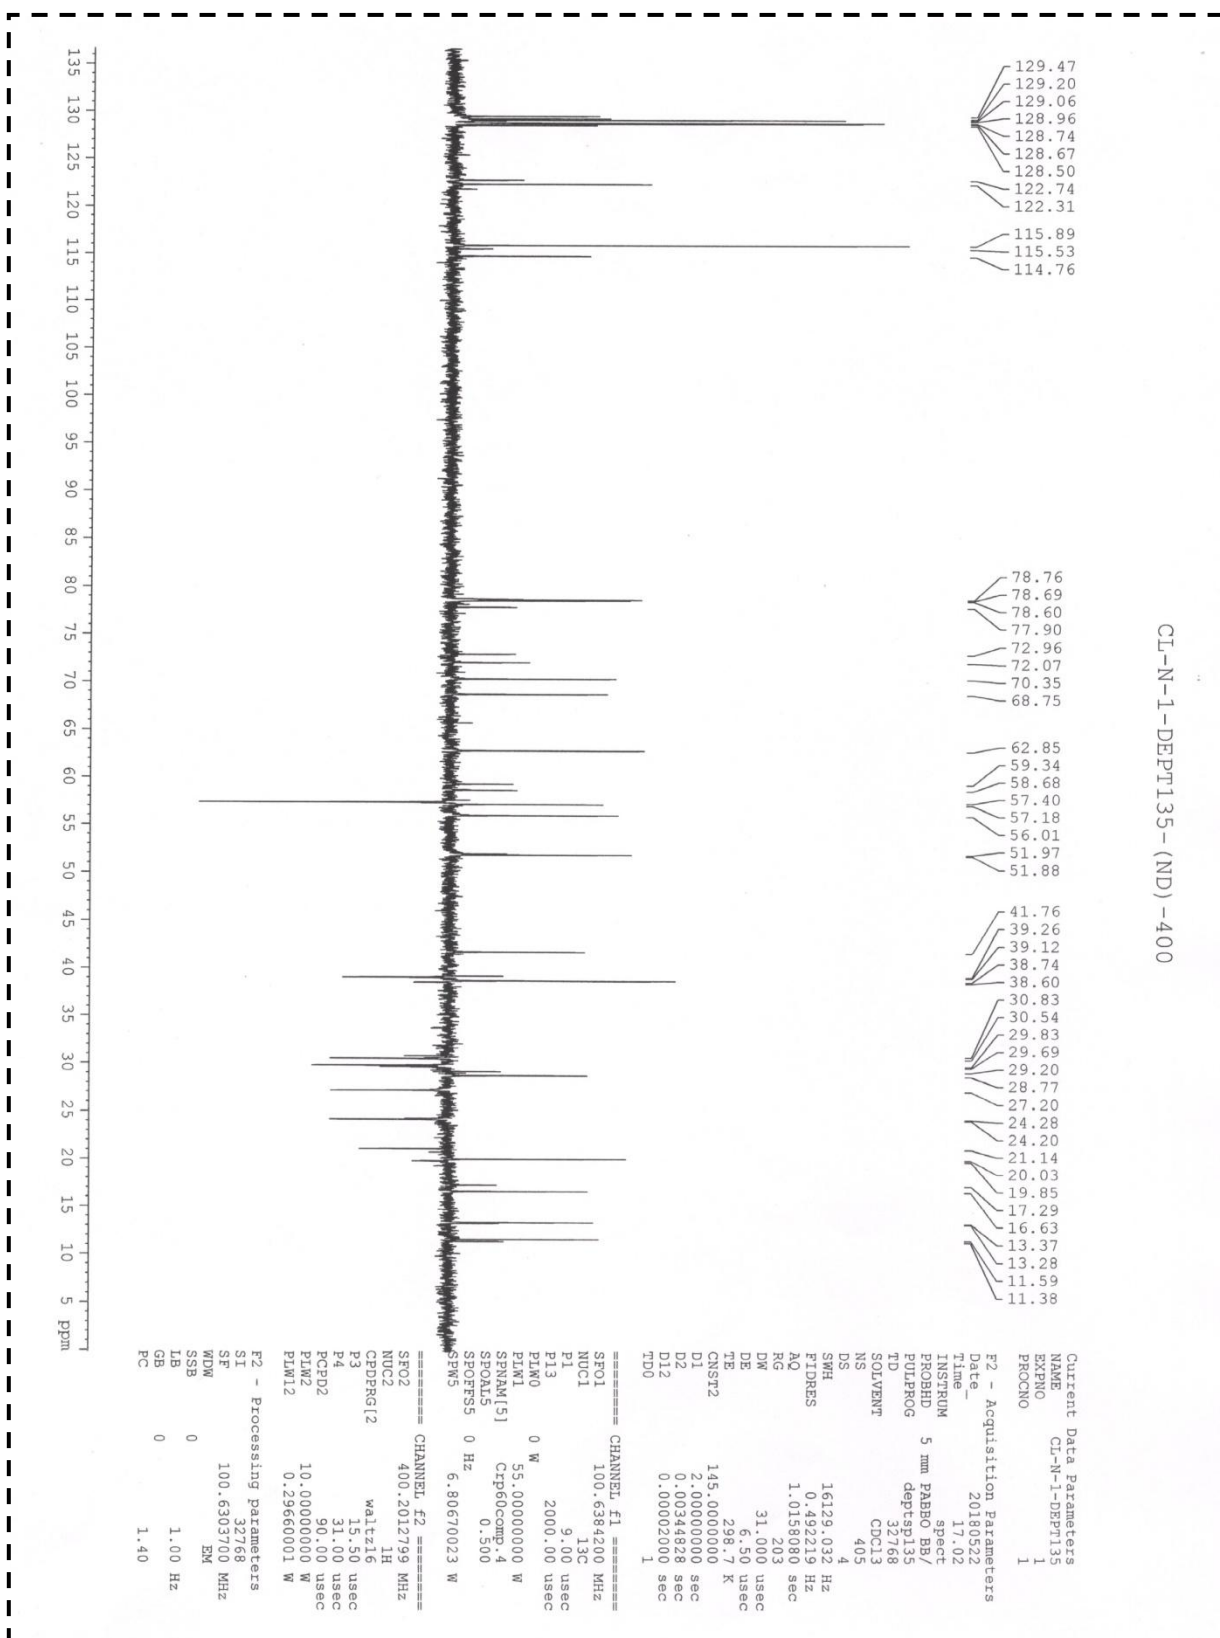

**Figure S36: Mass Spectra of Withaferin-Dinitrone Adduct 5**

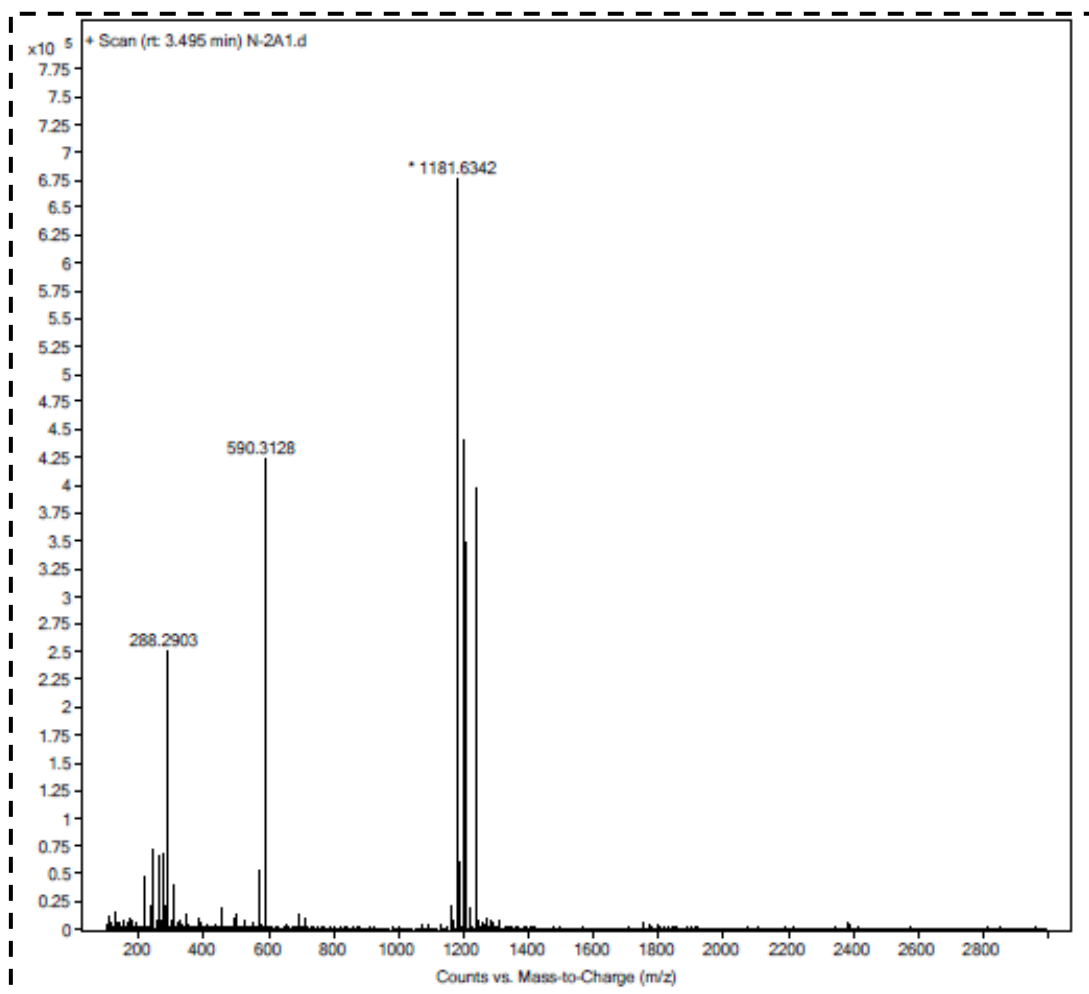

Figure S37:  $^1\text{H}$  NMR Spectra of Withaferin-Dinitrone Adduct 5

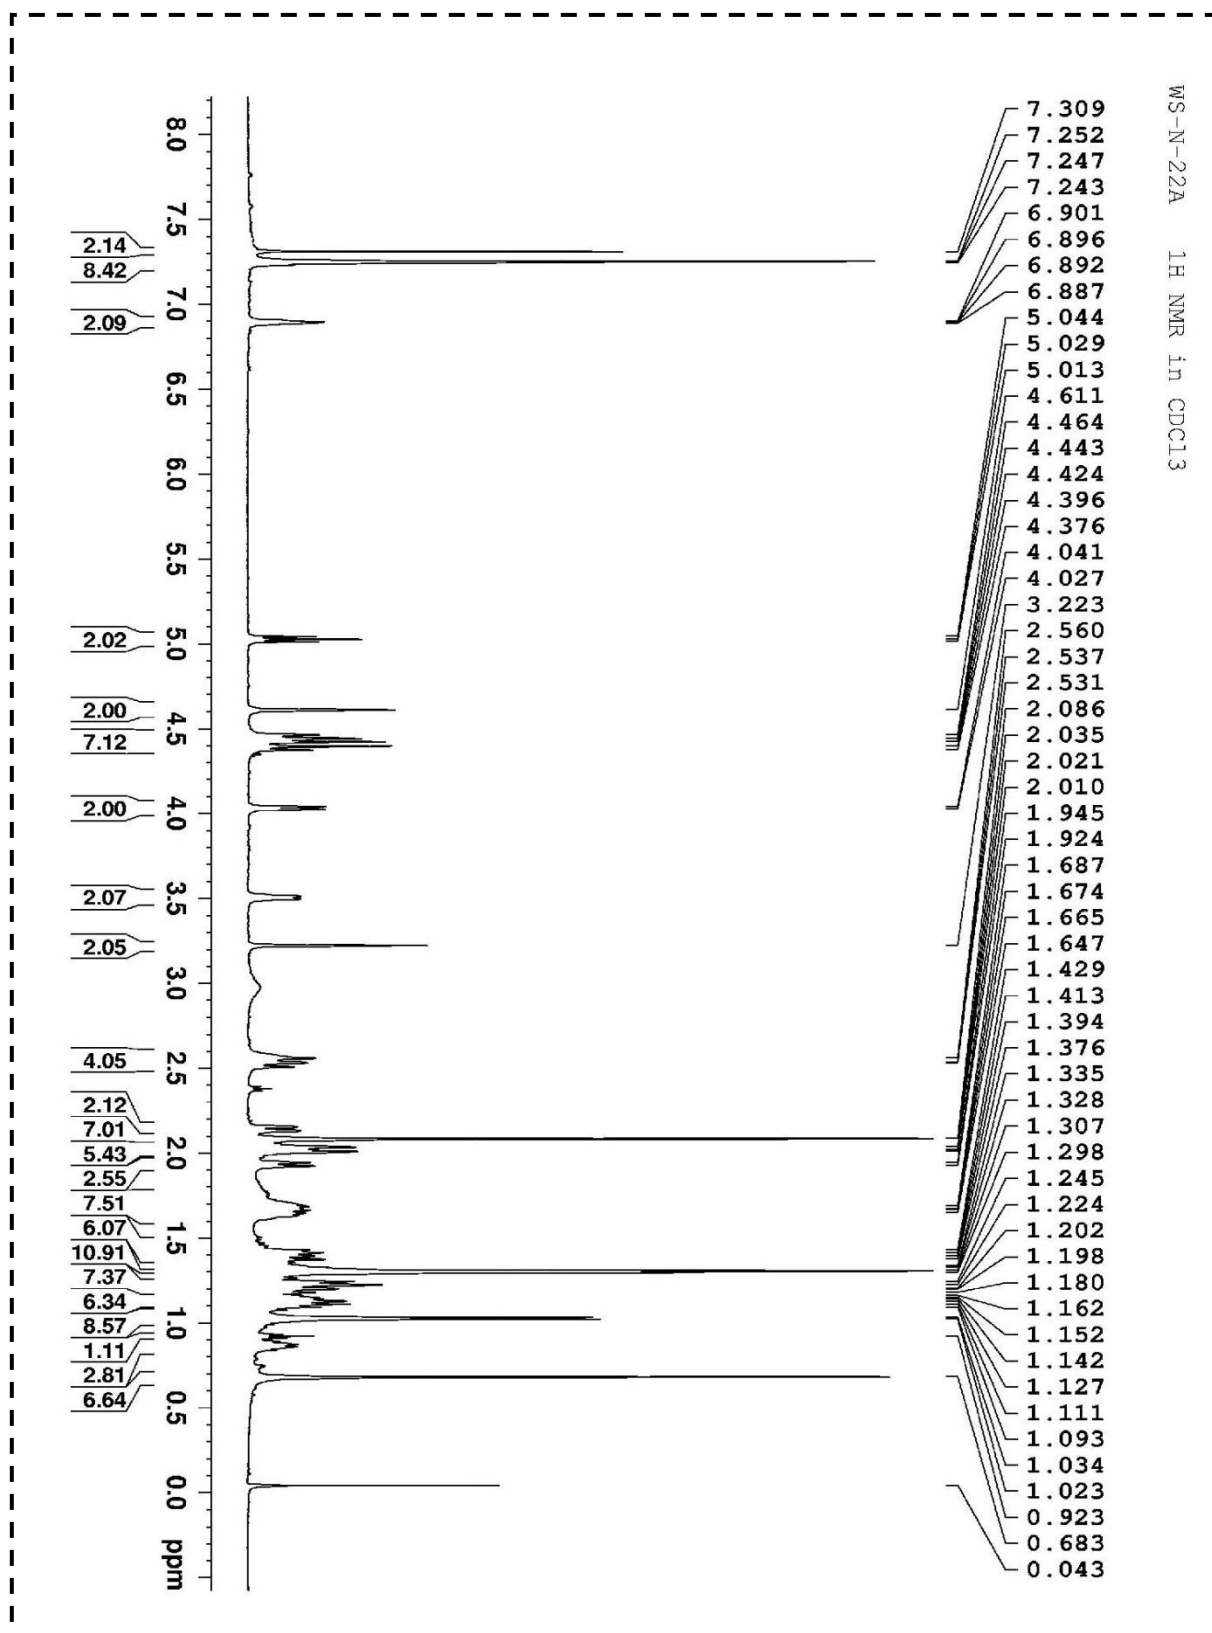

Figure S38:  $^1\text{H}$  NMR Spectra of Withaferin-Dinitrone Adduct 5

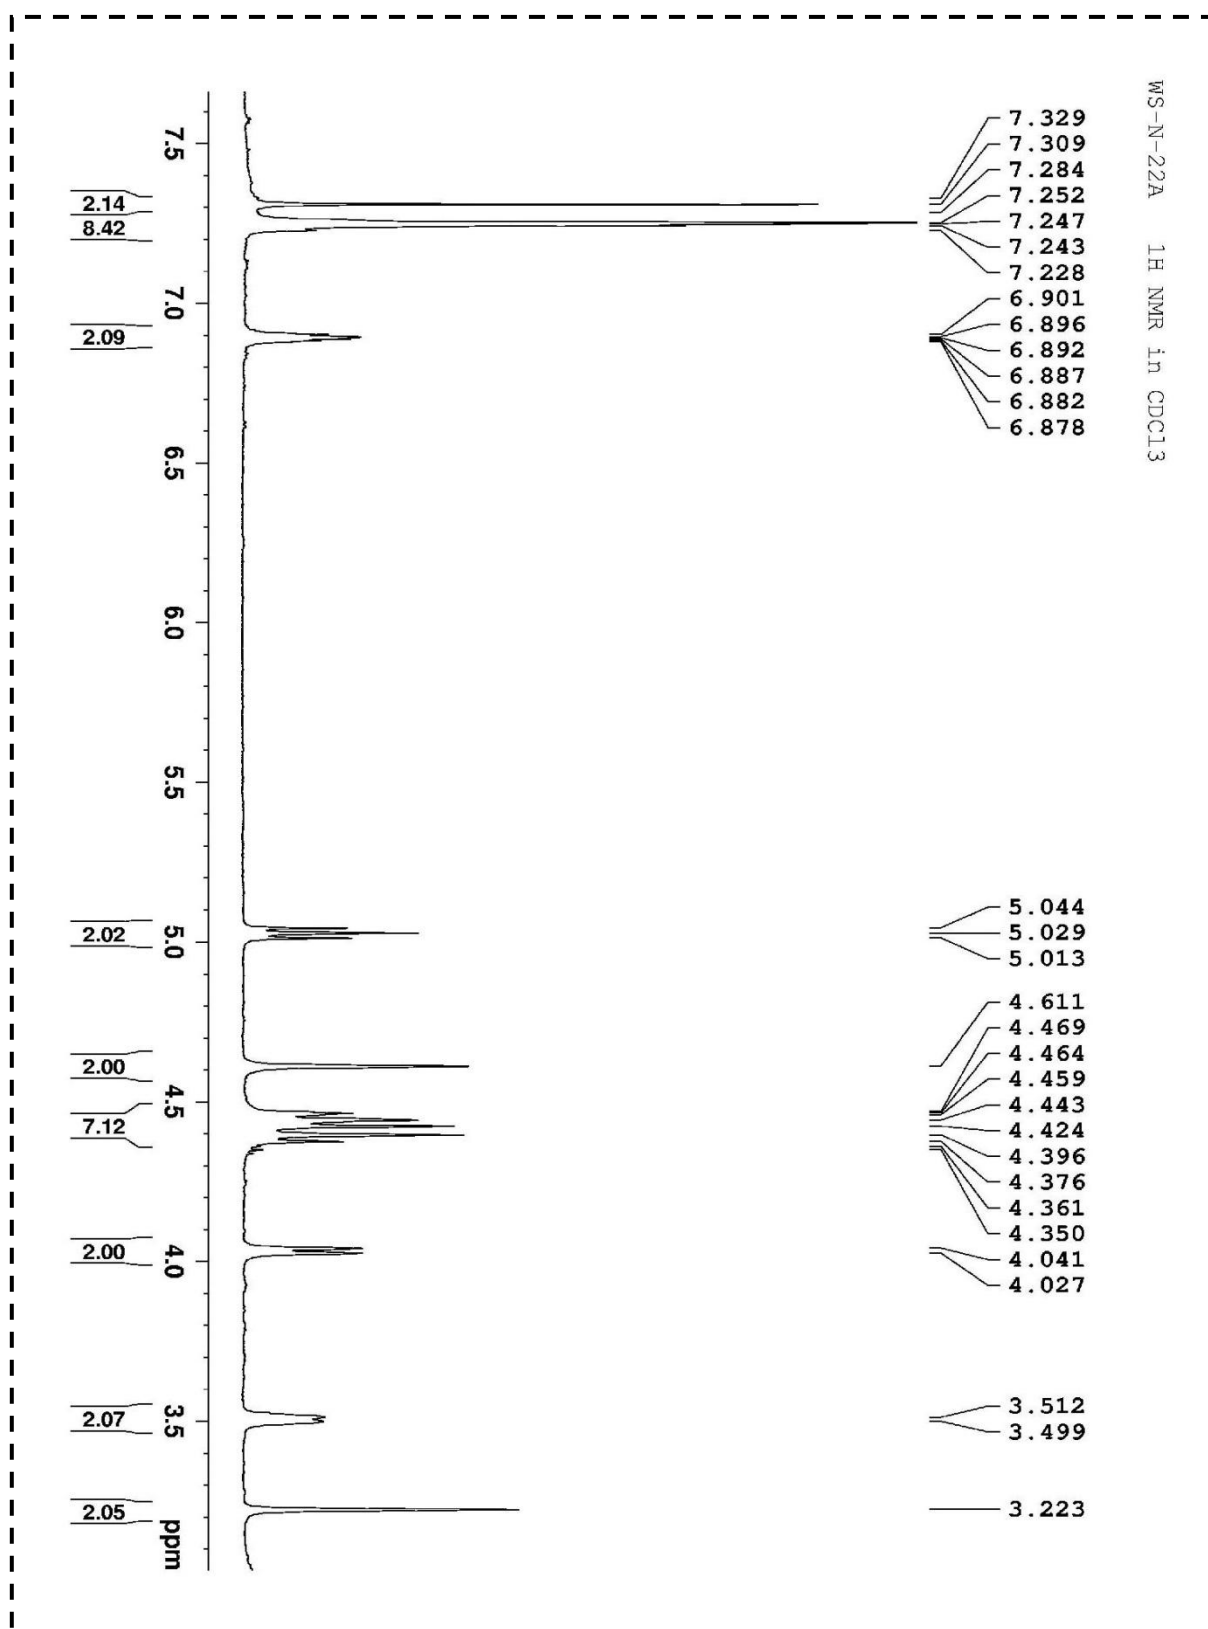

Figure S39:  $^1\text{H}$  NMR Spectra of Withaferin-Dinitrone Adduct 5

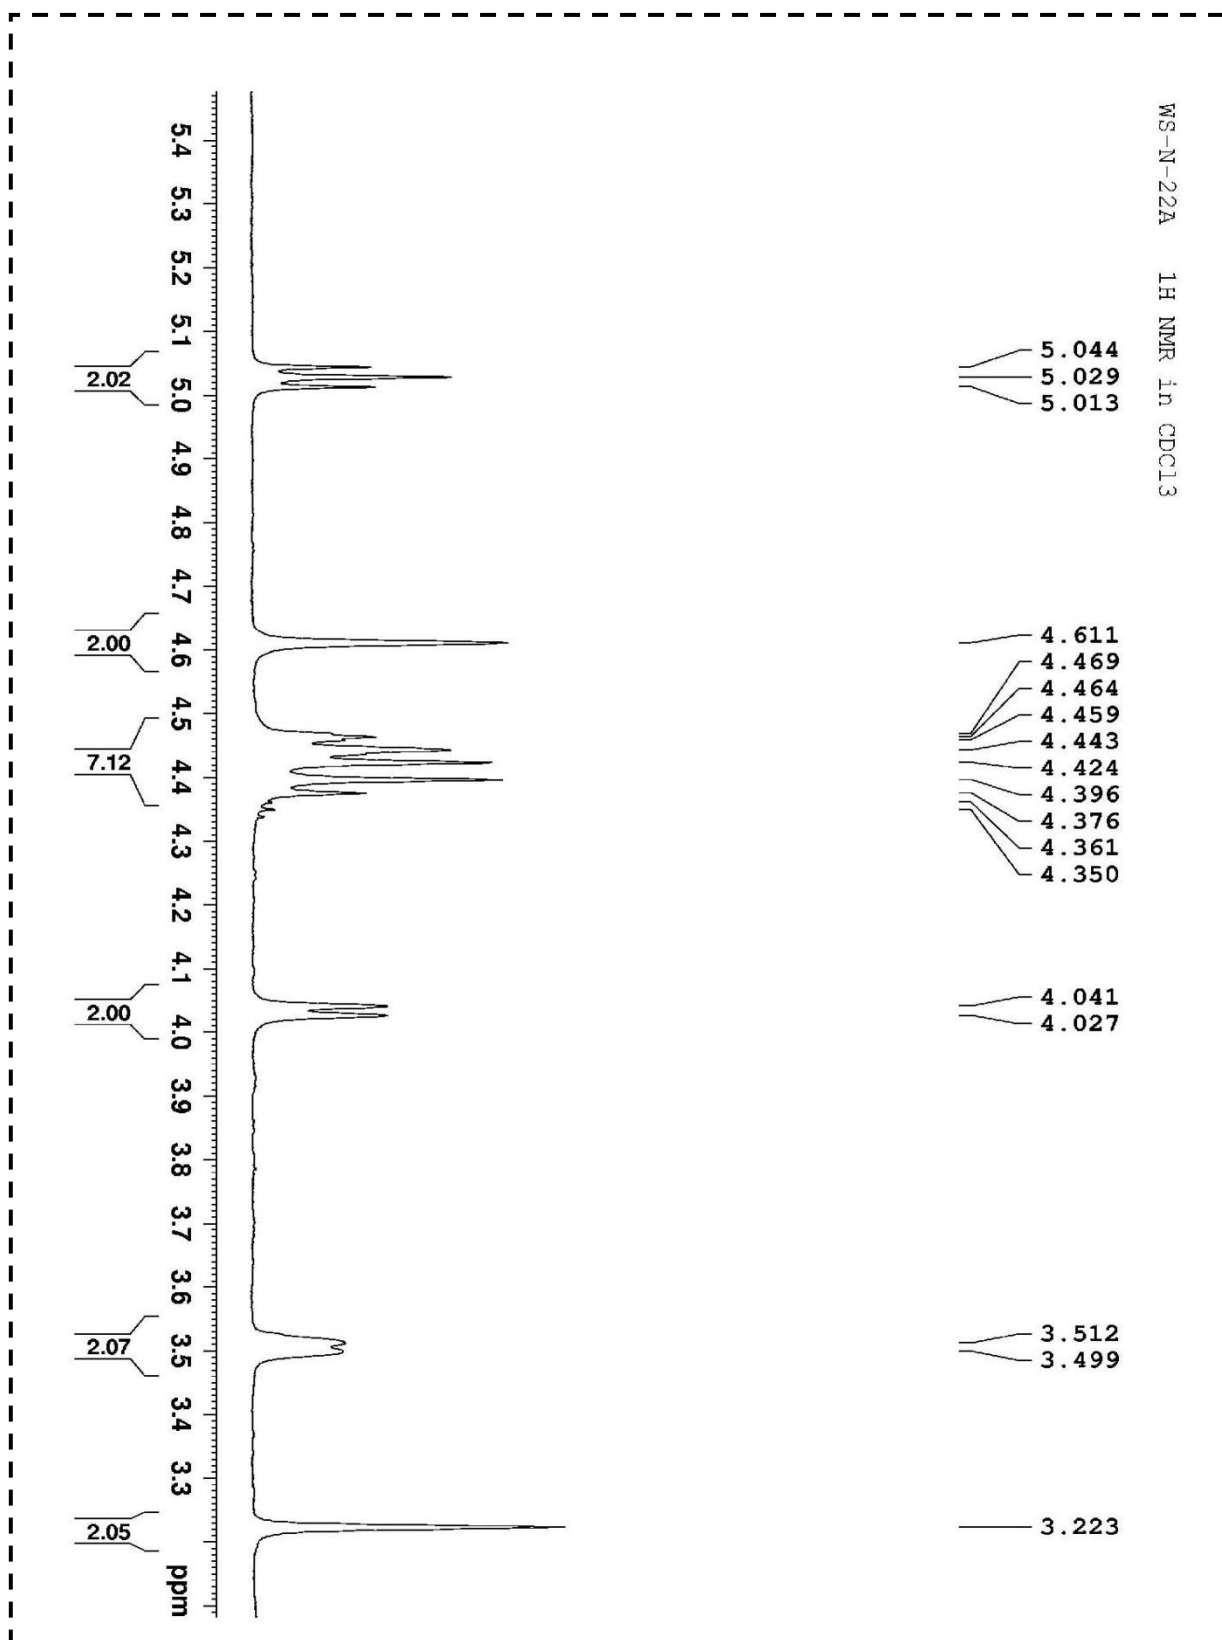



Figure S40:  $^1\text{H}$  NMR Spectra of Withaferin-Dinitrone Adduct 5

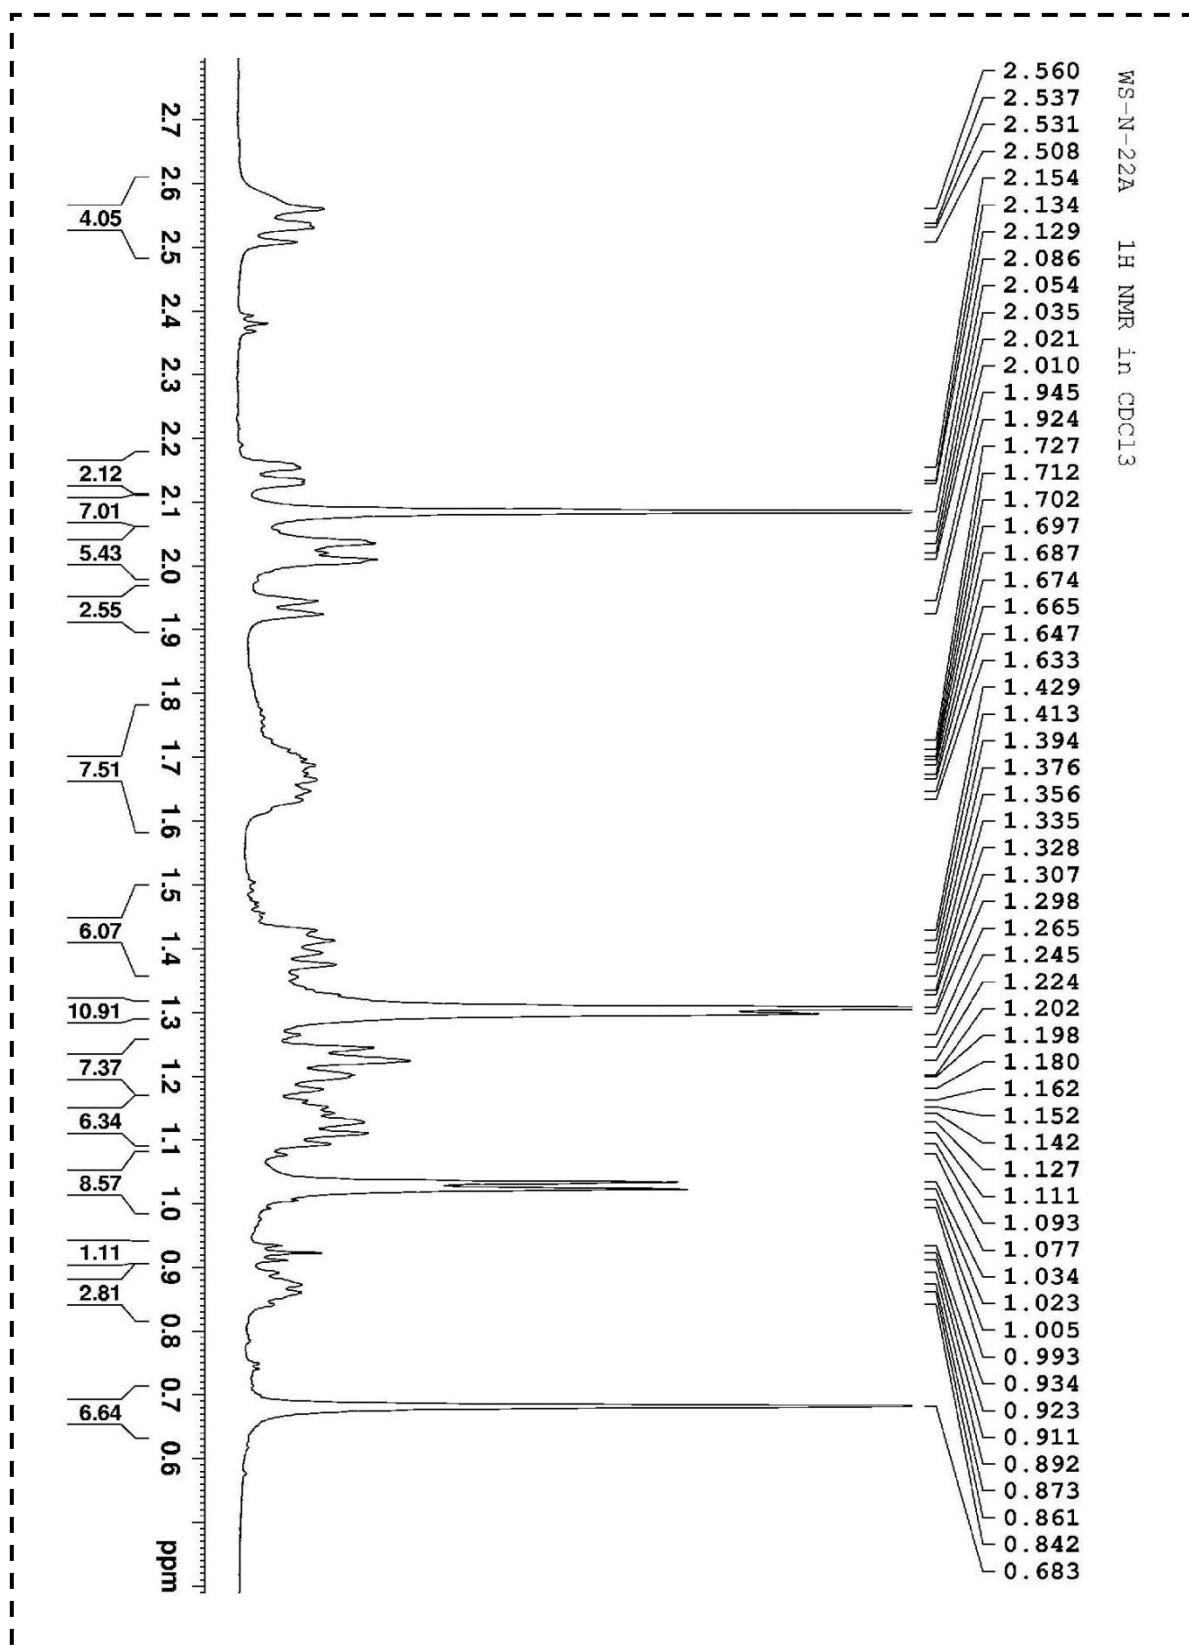

Figure S41:  $^{13}\text{C}$  NMR Spectra of Withaferin-Dinitrone Adduct 5

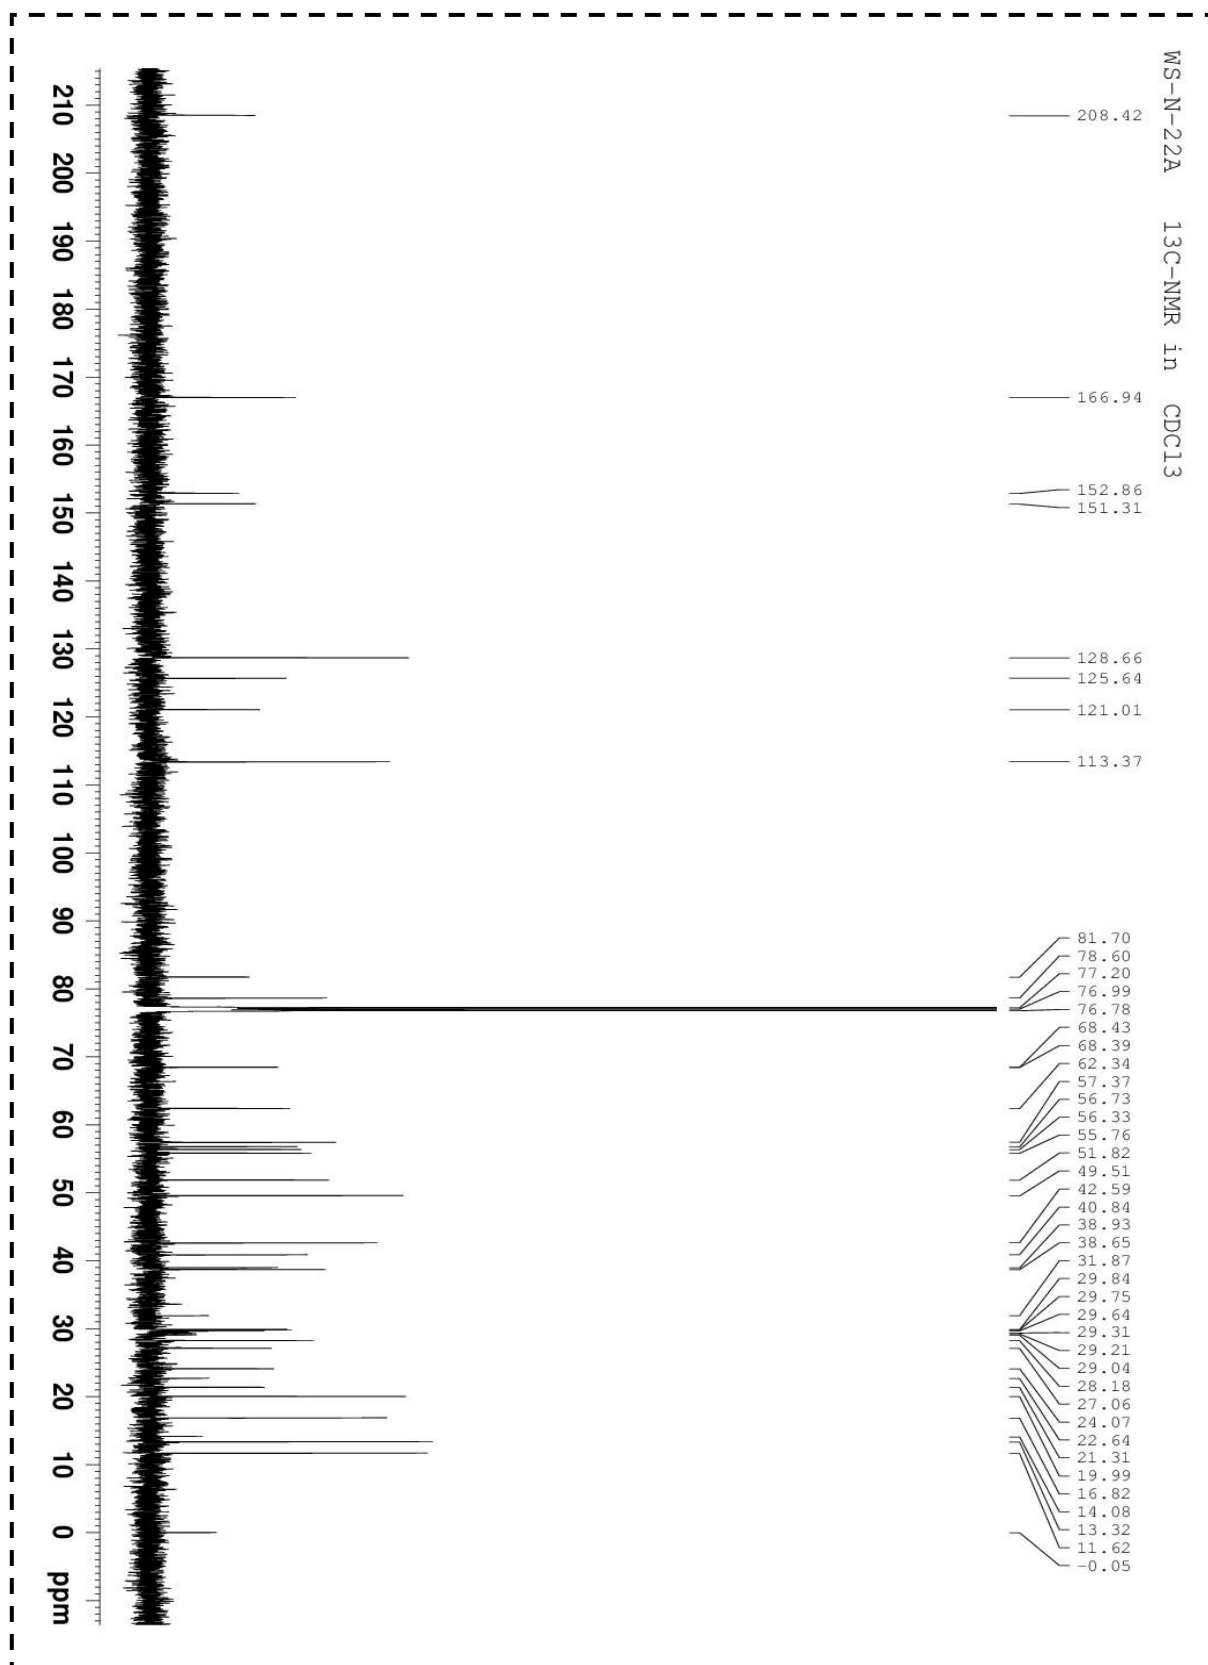

Figure S42: DEPT 90 of Withaferin-Dinitrone Adduct 5

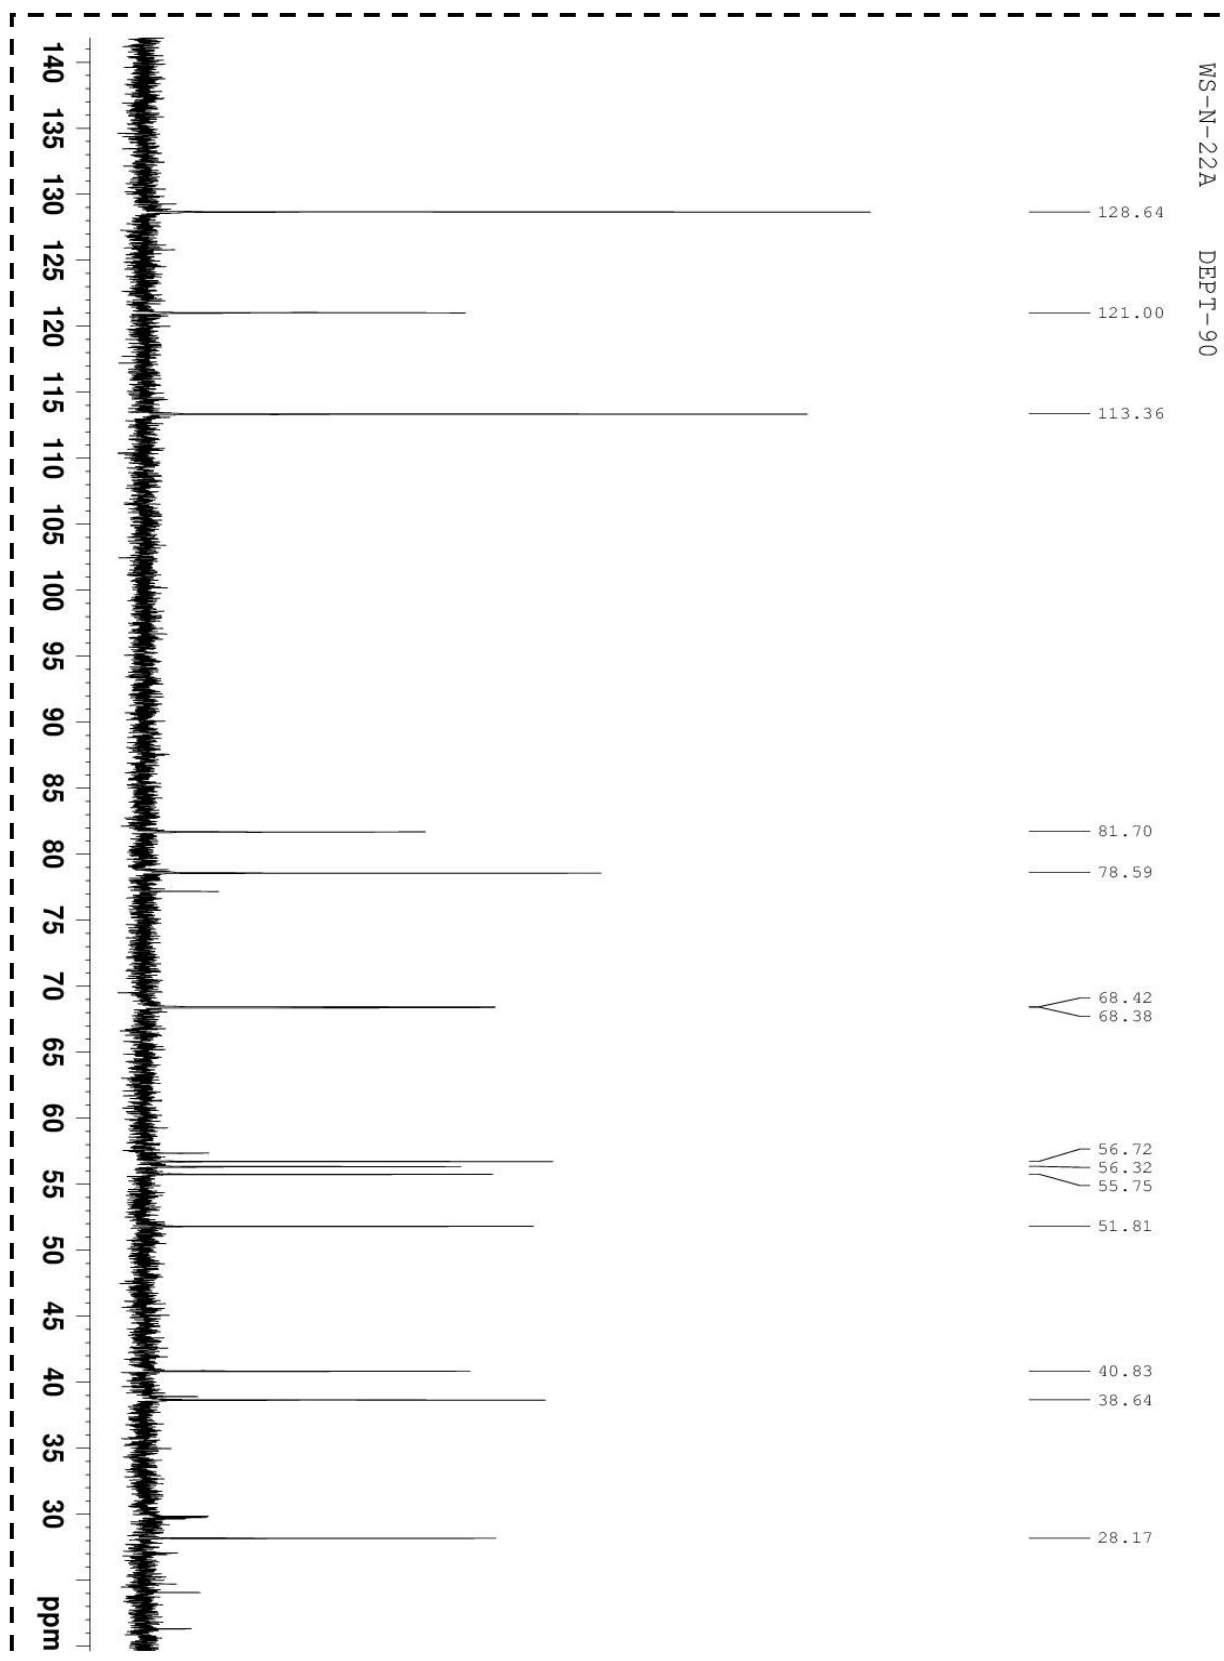

Figure S43: DEPT 135 of Withaferin-Dinitrone Adduct 5

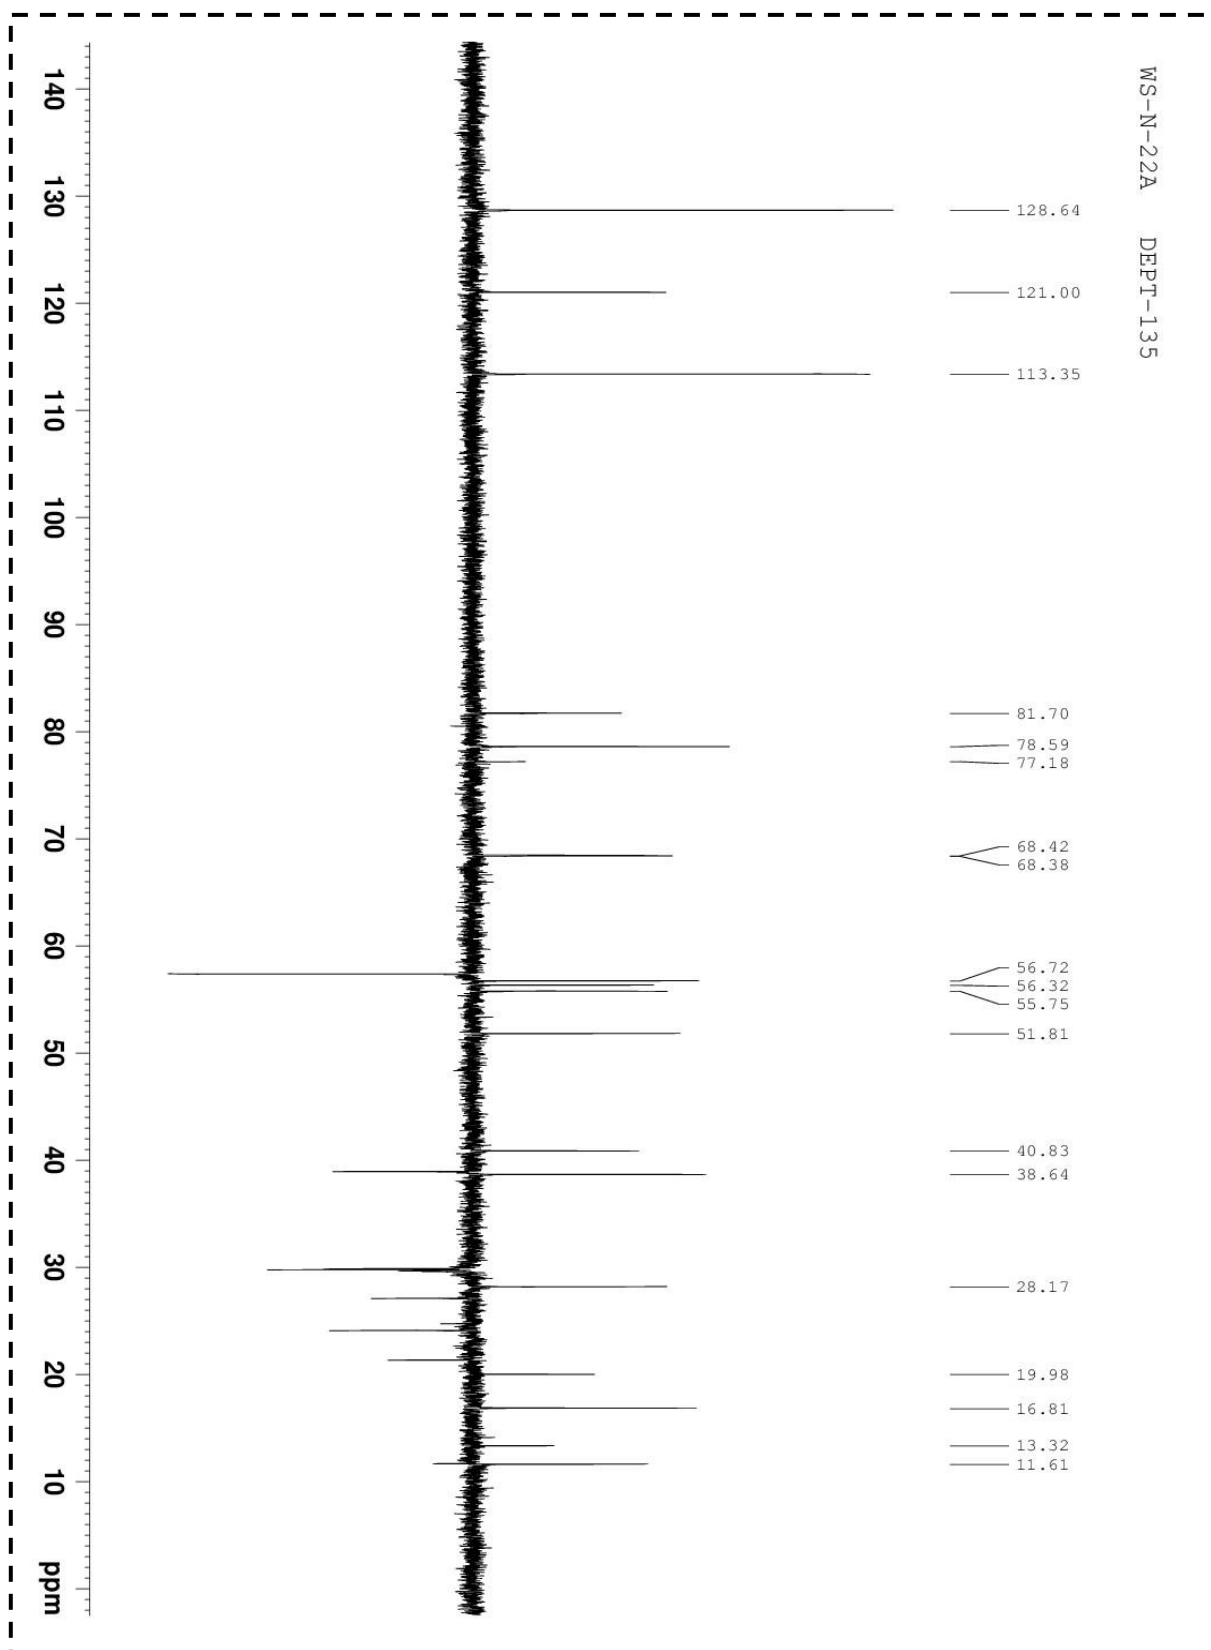

Figure S44: COSY of Withaferin-Dinitrone Adduct 5

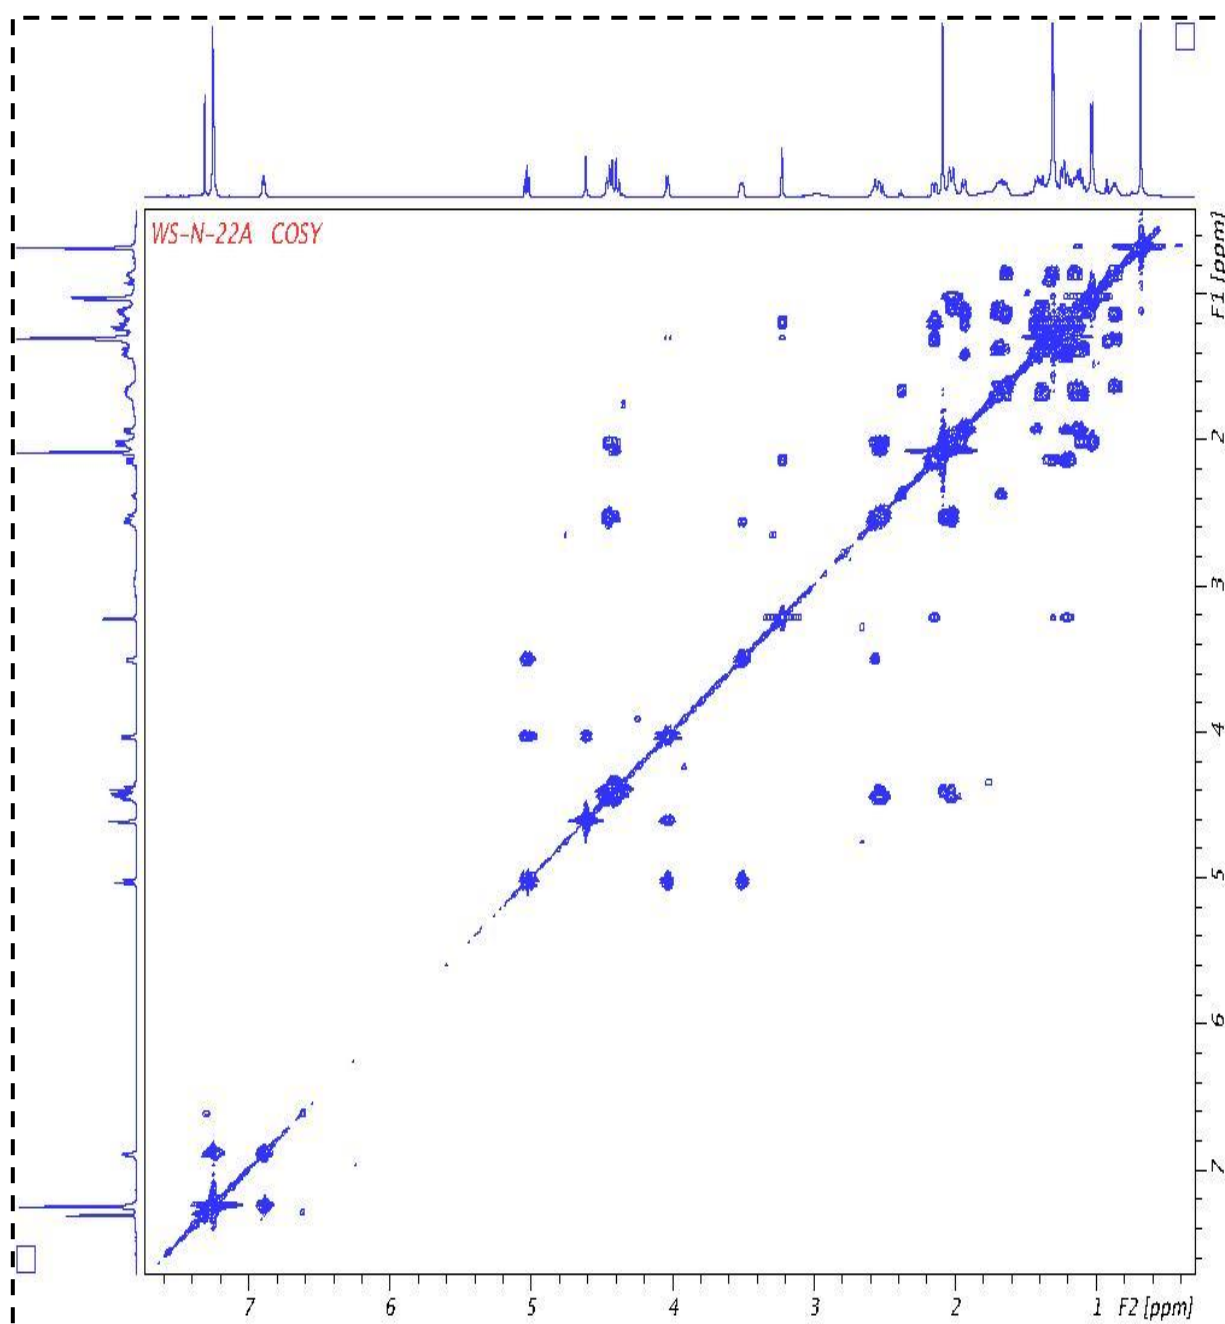

**Figure S45: NOESY of Withaferin-Dinitrone Adduct 5**

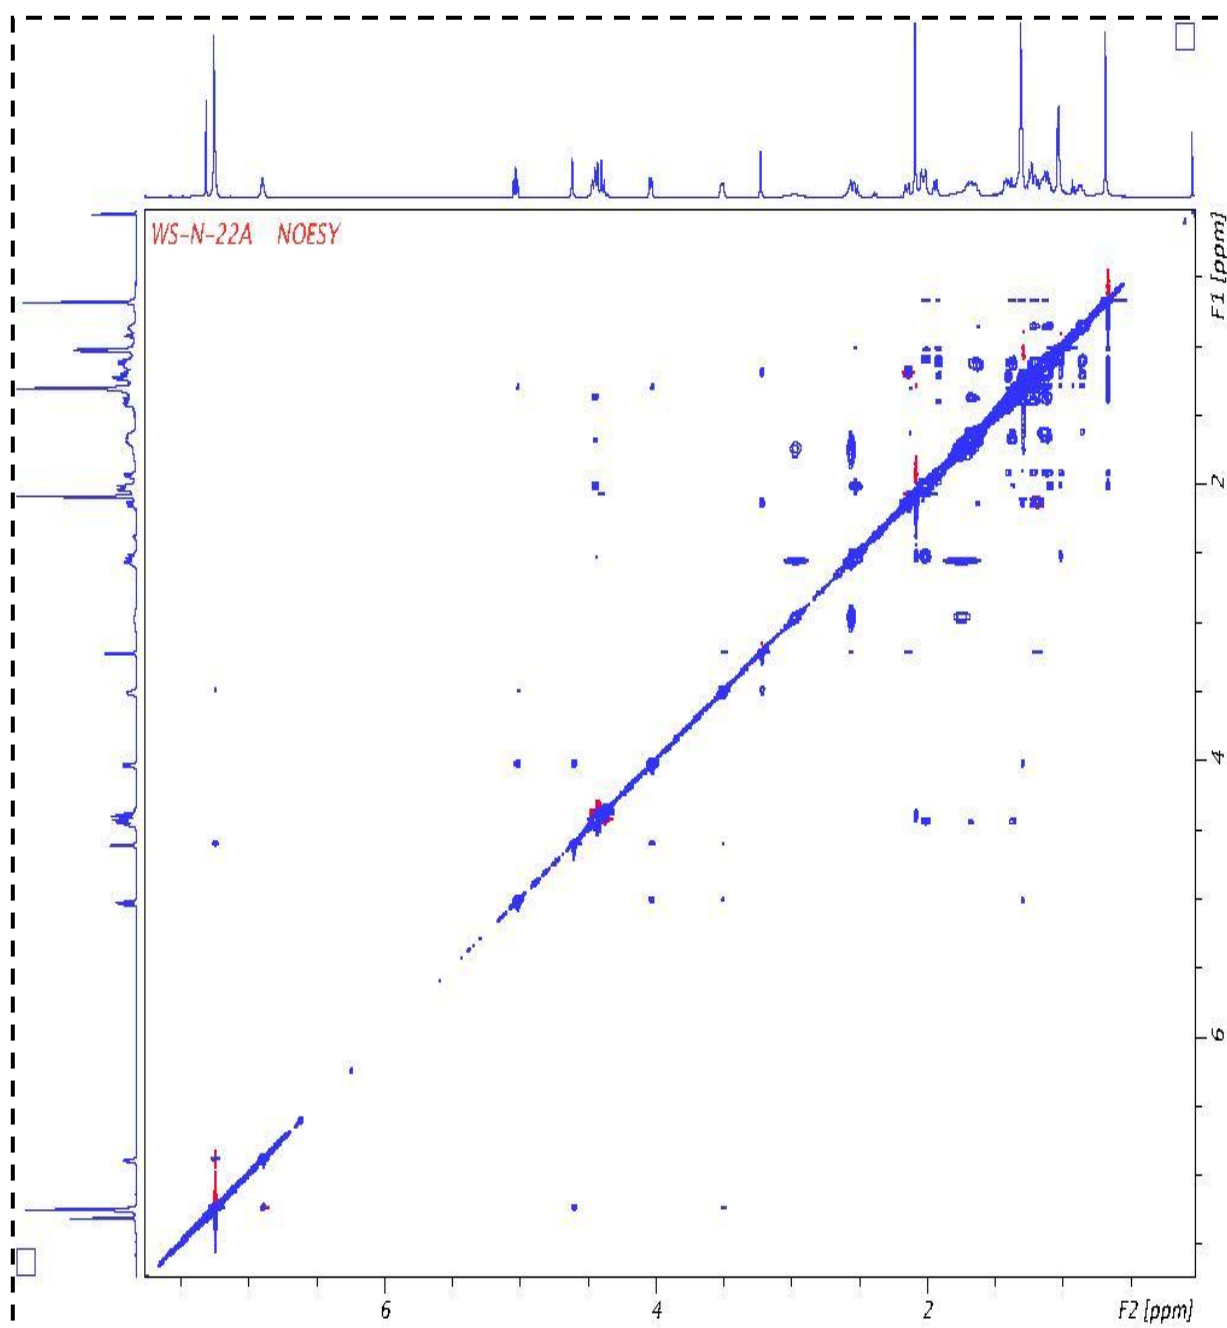

Figure S46: NOESY of Withaferin-Dinitrone Adduct 5

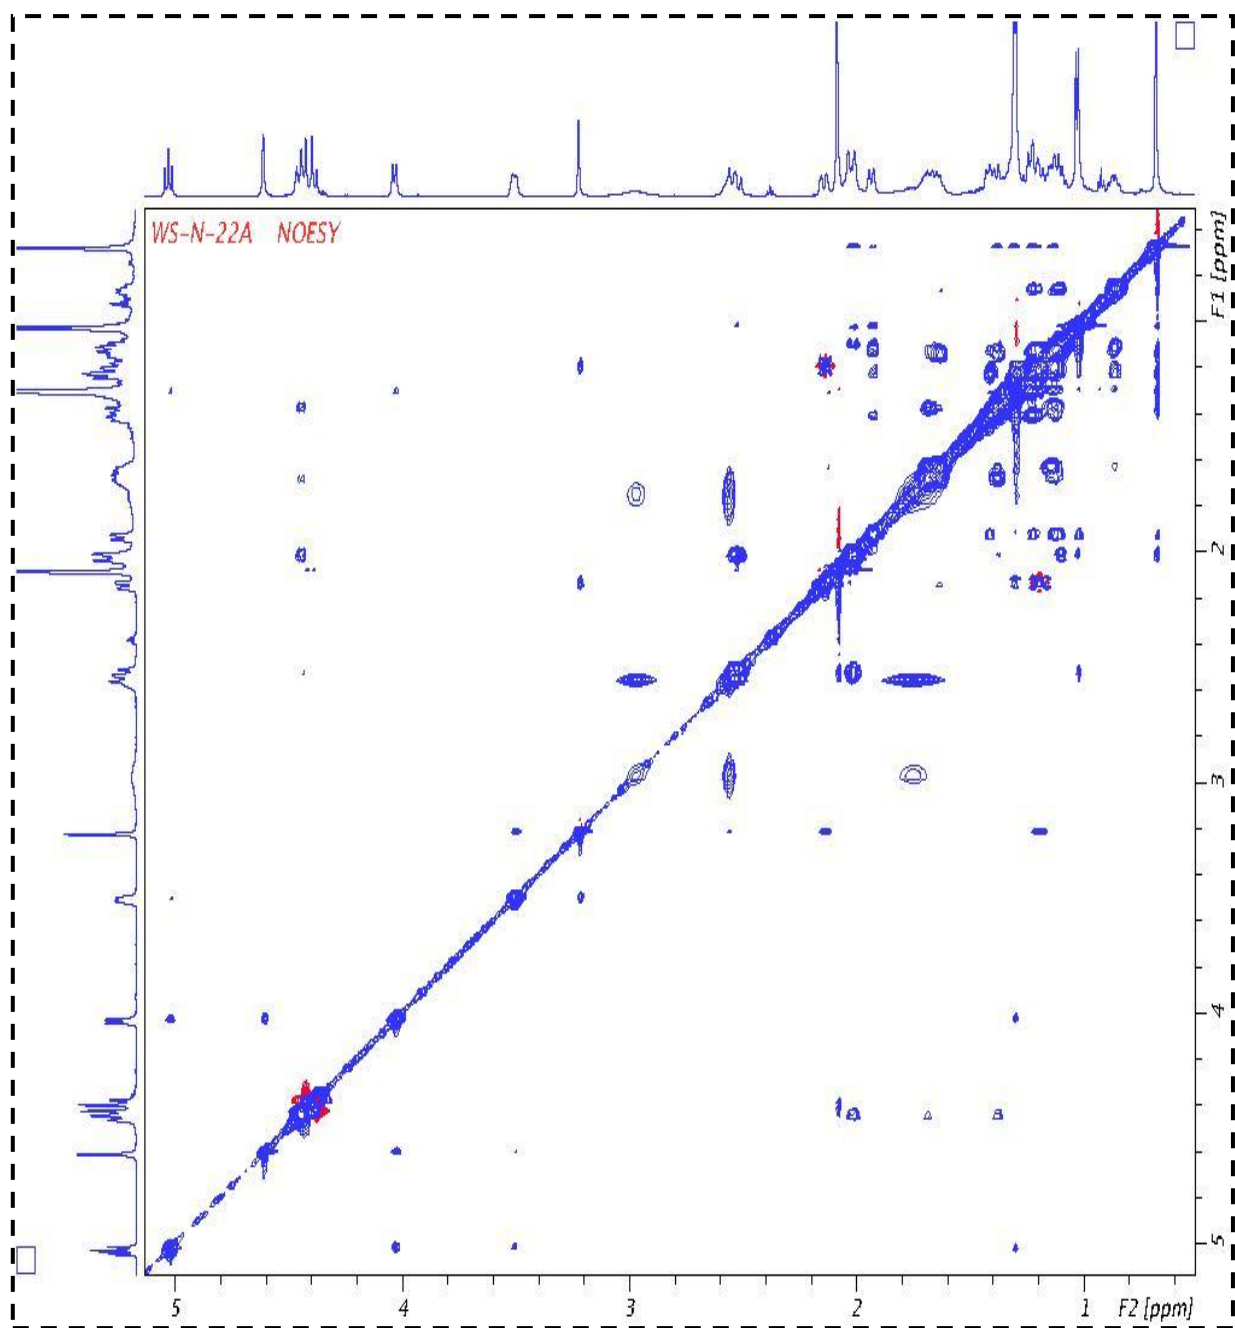

Figure S47: HMBC of Withaferin-Dinitrone Adduct 5

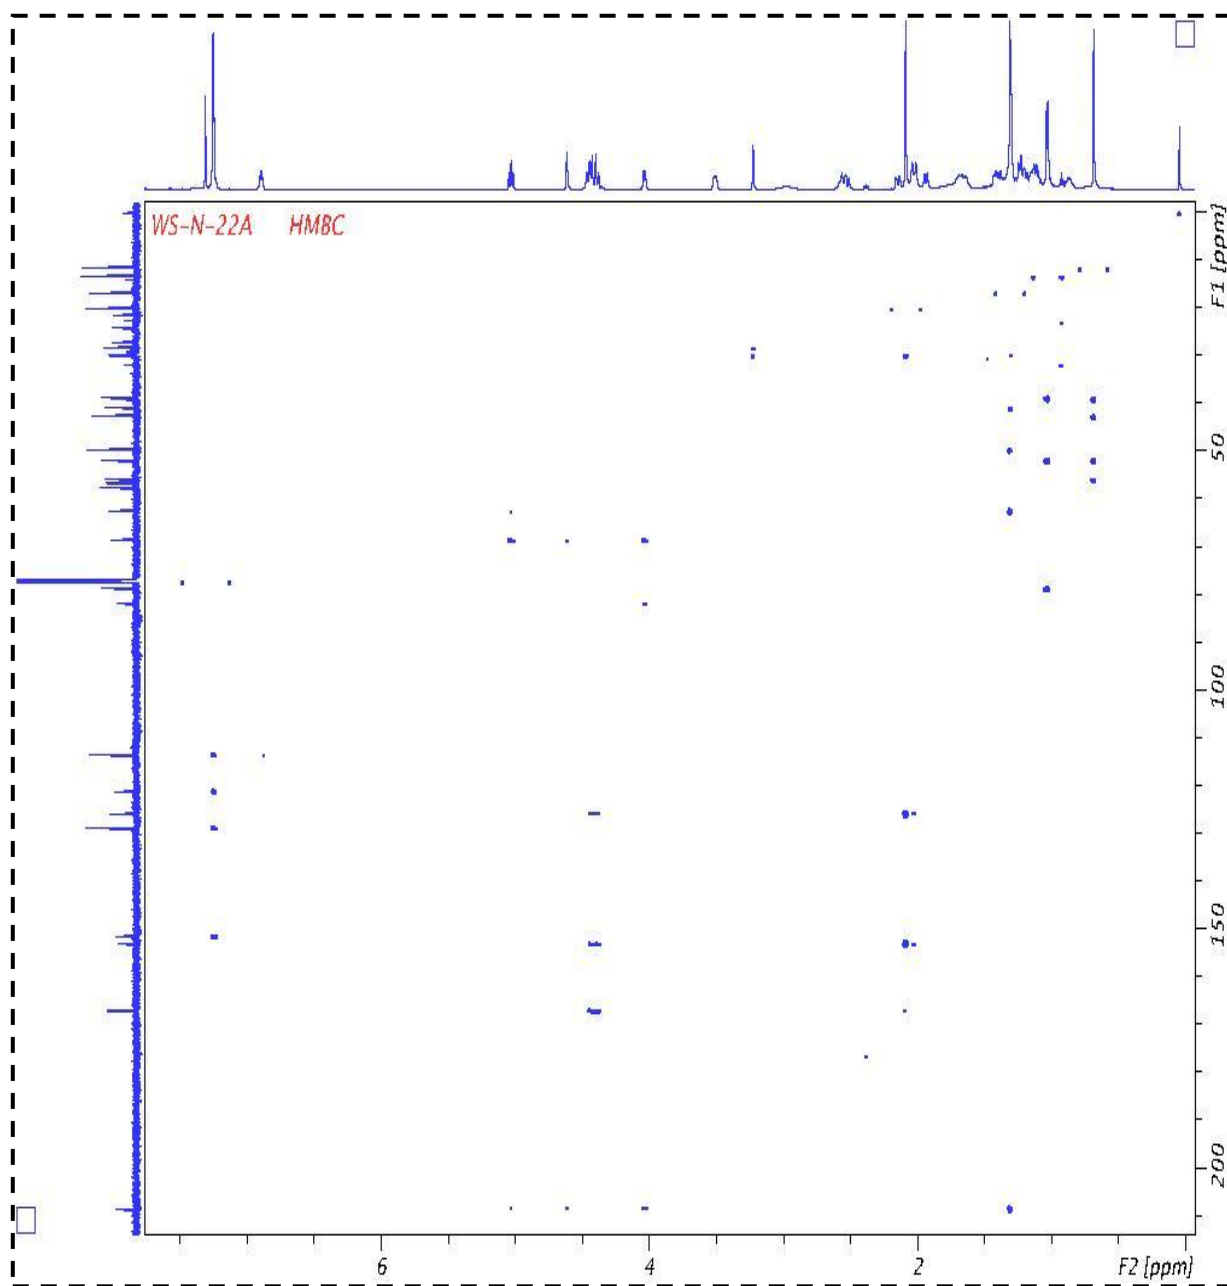



Figure S48: HSQC of Withaferin-Dinitrone Adduct 5

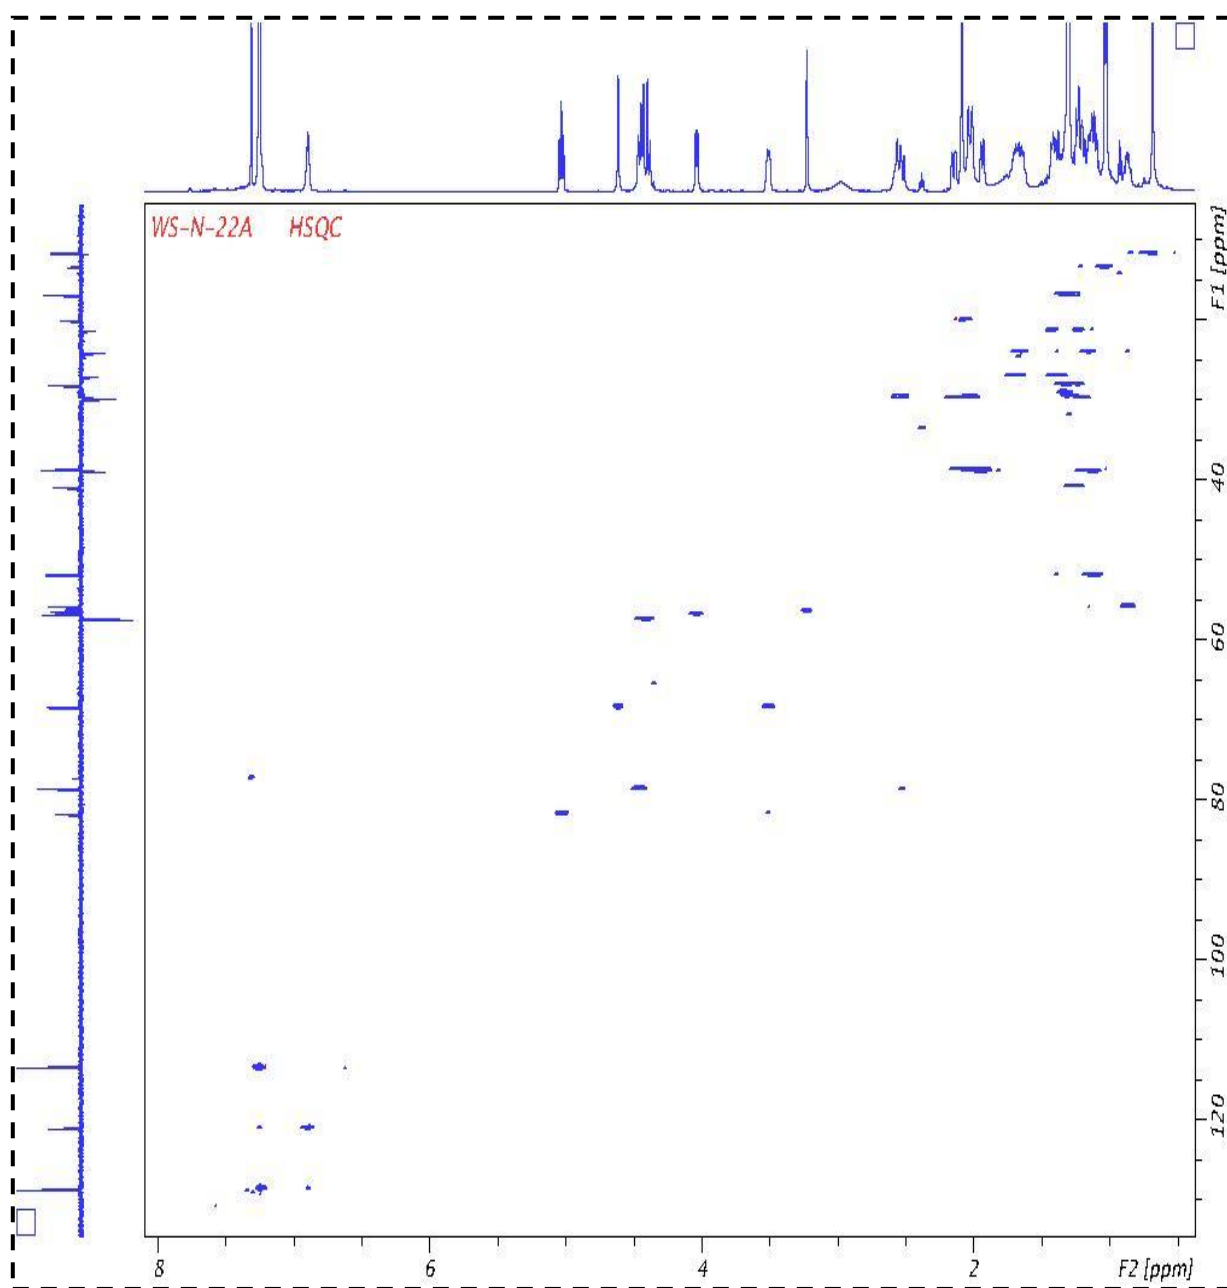

Supplement: Supplementary file 1 [file 14768969]
